# Supplementary material for: Activation of N2O, CO2, and CO at a sterically protected phosphorus center
Source: Royal Society of Chemistry journal article supplement (doi:10.1039/d6dt00986g), 2026-04-29
Supplement: d6dt00986g1.pdf [file d6dt00986g1.pdf]

Supporting Information for

**Activation of N<sub>2</sub>O, CO<sub>2</sub>, and CO at a sterically protected phosphorus center**

*John S. Wenger,<sup>\*[a]</sup> William J. Rowe,<sup>[a]</sup> and Meera Mehta<sup>\*[a]</sup>*

<sup>[a]</sup> Department of Chemistry, University of Oxford, 12 Mansfield Road, Oxford, OX1

3QR, U.K. [john.wenger@chem.ox.ac.uk](mailto:john.wenger@chem.ox.ac.uk), [meera.mehta@chem.ox.ac.uk](mailto:meera.mehta@chem.ox.ac.uk)

## Contents

|                                                                                                                                         |           |
|-----------------------------------------------------------------------------------------------------------------------------------------|-----------|
| <b>1. Experimental Methods</b> .....                                                                                                    | <b>3</b>  |
| <b>2. Synthesis and characterization of novel compounds</b> .....                                                                       | <b>9</b>  |
| <b>2.1 Synthesis of [K(crypt)][(M<sup>s</sup>FluInd*)PH]•(THF)(pentane)<sub>0.5</sub> (4•(THF)(pentane)<sub>0.5</sub>).</b><br>.....    | <b>9</b>  |
| <b>2.2 Synthesis of [K(crypt)][(M<sup>s</sup>FluInd*)PO<sub>2</sub>H] (5).</b> .....                                                    | <b>15</b> |
| <b>2.3 Synthesis of [K(crypt)][(M<sup>s</sup>FluInd*)P(CO<sub>2</sub>)H] (<sup>136</sup>) <i>in situ</i>.</b> .....                     | <b>21</b> |
| <b>2.4 Synthesis of (M<sup>s</sup>FluInd*)P (7).</b> .....                                                                              | <b>28</b> |
| <b>2.5 Synthesis of (M<sup>s</sup>FluInd*)PCO (8 and <sup>138</sup>) <i>in situ</i>.</b> .....                                          | <b>35</b> |
| <b>2.6 Photolysis of 8.</b> .....                                                                                                       | <b>42</b> |
| <b>3. Crystallographic Tables</b> .....                                                                                                 | <b>44</b> |
| <b>4. Computational Data</b> .....                                                                                                      | <b>47</b> |
| <b>5. References.</b> .....                                                                                                             | <b>74</b> |
| 1. Experimental Methods .....                                                                                                           | 3         |
| 2. Synthesis and characterization of novel compounds. ....                                                                              | 9         |
| 2.1 Synthesis of [K(2.2.2.crypt)][(M <sup>s</sup> FluInd*)PH]•(THF)(pentane) <sub>0.5</sub><br>(4•(THF)(pentane) <sub>0.5</sub> ). .... | 9         |
| 2.2 Synthesis of [K(2.2.2.crypt)][(M <sup>s</sup> FluInd*)PO <sub>2</sub> H] (5). ....                                                  | 15        |
| 2.3 Synthesis of [K(2.2.2.crypt)][(M <sup>s</sup> FluInd*)P(CO <sub>2</sub> )H] ( <sup>136</sup> ) <i>in situ</i> . ....                | 21        |
| 2.4 Synthesis of (M <sup>s</sup> FluInd*)P (7). ....                                                                                    | 28        |
| 2.5 Synthesis of (M <sup>s</sup> FluInd*)PCO (8 and <sup>138</sup> ) <i>in situ</i> . ....                                              | 35        |
| 2.6 Photolysis of 8. ....                                                                                                               | 42        |
| 3. Crystallographic Tables .....                                                                                                        | 44        |
| 4. Computational Data .....                                                                                                             | 47        |
| 5. References. ....                                                                                                                     | 74        |



## 1. Experimental Methods

**General Methods.** Dimethyl isophthalate, *tert*-butyl lithium (1.7 M in pentane),  $\text{PCl}_3$ ,  $\text{AlCl}_3$ ,  $\text{BCl}_3$  (1M in hexane mixed isomers),  $\text{LiAlH}_4$ , and  $\text{Et}_4\text{NOH}\cdot(\text{H}_2\text{O})_5$  were purchased from Sigma-Aldrich. Fluorene, sulfuric acid, hydrochloric acid (aq.), methylmagnesium bromide (3 M in diethyl ether), and 2.2.2.cryptand ([crypt](#)) were purchased from Thermo Fisher Scientific. 2,5-Dimethyl-2,5-hexanediol was purchased from Fluorochem. Trimethylsilyl chloride (TMSCl) was purchased from ChemCruz. N-Bromosuccinimide was purchased from Alfa Aesar.  $\text{N}_2\text{O}$  and CO were purchased from CK Isotopes Limited.  $^{13}\text{CO}_2$  was purchased from Cambridge Isotope Laboratories, Inc. Reagents purchased from commercial vendors were used as received, unless otherwise stated.  $(\text{M}^s\text{FluInd})^*\text{Br}$  was synthesized as previously reported;<sup>1</sup> however, we provide the overall synthetic route below with literature references for the synthesis of each precursor employed in this work. Potassium benzylate (KBz) was synthesized as previously reported.<sup>2</sup>  $(\text{M}^s\text{FluInd}^*)\text{PCl}_2$  (**1**),  $(\text{M}^s\text{FluInd}^*)\text{PH}_2$  (**2**), and  $(\text{M}^s\text{FluInd}^*)\text{PTMSH}$  (**3**) were synthesized as previously reported.<sup>3</sup> All manipulations were performed under an inert atmosphere using standard Schlenk line, and glovebox (MBraun Unilab). Glassware was flame dried prior to use. Glass filter papers were oven-dried prior to use. Solvents diethyl ether ( $\text{Et}_2\text{O}$ ), benzene, toluene, hexane, dichloromethane (DCM), pentane, and tetrahydrofuran (THF) were purified using an Innovative Technologies anhydrous engineering solvent purification system and degassed prior to being stored on 3 Å molecular sieves.  $\text{C}_6\text{D}_6$  was degassed and stored on 3 Å molecular sieves. Gaseous  $\text{N}_2\text{O}$ ,  $^{13}\text{CO}_2$ , and CO were transferred from purchased cylinders into ampoules containing 3 Å molecular sieves to dry for at least 6 h prior to use.

**NMR Spectroscopy.**  $^1\text{H}$ ,  $^{13}\text{C}\{^1\text{H}\}$ ,  $^{31}\text{P}$ , and  $^{31}\text{P}\{^1\text{H}\}$  were recorded on a Bruker AVIII 400 (operating frequencies: 400.20 MHz, 100.64 MHz, and 162.00 MHz for  $^1\text{H}$ ,  $^{13}\text{C}$ , and  $^{31}\text{P}$  respectively) or Bruker AVIII 500 (operating frequencies: 499.94, 125.71, and 202.37 MHz for  $^1\text{H}$ ,  $^{13}\text{C}$ , and  $^{31}\text{P}$  respectively) spectrometer.  $^1\text{H}$  and  $^{13}\text{C}\{^1\text{H}\}$  NMR spectra were referenced internally to residual solvent signals  $^1\text{H}$   $\delta$  = 7.16 ppm,  $^{13}\text{C}\{^1\text{H}\}$   $\delta$  = 128.02 ppm for  $\text{C}_6\text{D}_6$ .  $^{31}\text{P}$  and  $^{31}\text{P}\{^1\text{H}\}$  spectra were referenced externally to  $\text{H}_3\text{PO}_4$ . Solution phase NMR samples were prepared under an inert atmosphere in 5 mm J Young NMR tubes. NMR data were analyzed using MestReNova software.

**X-ray Crystallography – Instrument.** X-ray diffraction data for **4**, **5**, <sup>136</sup>, and <sup>138</sup> were collected with an Oxford Diffraction Supernova dual-source diffractometer equipped with a 135 mm Atlas CCD area detector. X-ray diffraction data for **7**•(toluene)<sub>0.5</sub> were collected on a dual wavelength Rigaku FR-X rotating anode diffractometer equipped with an AFC-11 4-circle kappa geometry goniometer, a Hypix-6000HE detector, VariMAX™ microfocus optics, and an Oxford Cryosystems Cryostream 800 nitrogen flow gas system. Data were collected and reduced using Rigaku CrysAlisPro (version 43).<sup>4</sup>

**X-ray Crystallography – Structure Solution and Refinement.** The structures were solved using SHELXT and refined using SHELXL within the suite of programs provided by Olex2,<sup>5</sup> following established strategies.<sup>6</sup> All non-H atoms were refined anisotropically. C-bound H atoms were placed at calculated positions and refined with a riding model and coupled isotropic displacement parameters ( $1.2 \times U_{eq}$  for non-methyl C-H atoms and  $1.5 \times U_{eq}$  for methyl groups). In the case of **4** and <sup>136</sup>, the P-bound H atom was located in the Fourier difference map and treated with a distance (DFIX) restraint. In the case of **5**, the {PHO<sub>2</sub>} unit is disordered, and the location of the P-bound H atom could not be reliably located in the Fourier difference map and was placed at a calculated, chemically reasonable position with a distance (DFIX) restraint. Crystallographic data for **4**, **5**, <sup>136</sup>, **7**•(toluene)<sub>0.5</sub>, and <sup>138</sup> have been deposited *via* the joint CCDC/FIZ Karlsruhe deposition service under 2537504, 2537507, 2537506, 2537503, and 2537505, respectively.

**X-ray Crystallography – Treatment of Crystallographic Disorder.** Disordered components were modelled with similarity (SIMU), rigid bond (RIGU), and distance (SADI) restraints where appropriate. Non-default restraint values were employed when chemically reasonable and necessary for stable refinement. In the case of **5**, **7**•(toluene)<sub>0.5</sub>, and **8**, the {PHO<sub>2</sub>}, {PC<sub>2</sub>}, and {PCO} units, respectively, are disordered about two positions in each case, and this disorder precludes meaningful discussion of bond metrics.

**X-ray Crystallography – Use of Solvent Masks.** The crystal structures of <sup>136</sup>, **7**•(toluene)<sub>0.5</sub>, and <sup>138</sup> contained severely disordered solvent, which could not be reliably modelled, and, as such, these structures were refined with solvent masks in Olex2. The solvent mask applied in the case of <sup>136</sup> identified electron-containing voids in the unit cell

with a total electron count of 82.2 electrons in a volume of 598.6 Å<sup>3</sup>. The solvent mask applied in the case of **7**•(toluene)<sub>0.5</sub> identified electron-containing voids in the unit cell with a total electron count of 196.9 electrons in a volume of 877.8 Å<sup>3</sup>. The solvent mask applied in the case of <sup>13</sup>**8** identified an electron-containing void in the unit cell with a total electron count of 152.0 electrons in a volume of 1006.3 Å<sup>3</sup>. In all cases, the voids are consistent with the presence of highly disordered hydrocarbon molecules in the crystal. The reported chemical formula and properties in <sup>13</sup>**6**, **7**•(toluene)<sub>0.5</sub>, and <sup>13</sup>**8** do not include the disordered solvent, which was not modelled.

**Elemental analysis.** Elemental analyses were performed by the analytical service of London Metropolitan University, where samples were weighed using a Mettler Toledo high precision scale and analyzed using a ThermoFlash 2000.

**Mass spectrometry.** Samples for mass spectrometry were prepared by diluting 100 µL of a 1 mg/mL stock solution of analyte in THF with 900 µL of THF under inert atmosphere. The resulting mixture was filtered through glass filter paper before being injected into an electrospray ionization (ESI) equipped Waters RDa bench-top time of flight mass spectrometer provided by the mass spectrometry service of the University of Oxford. Mass spectra were simulated using the online Prot Pi Mass Spectrum Simulator.

**Infrared spectroscopy.** ATR-IR spectra were recorded on microcrystalline solids using a Bruker Alpha II under a dry N<sub>2</sub> atmosphere.

**UV-Vis spectroscopy.** Ultraviolet-visible (UV-Vis) electronic absorption spectra were recorded using a Mettler Toledo UV5Bio spectrophotometer. Samples were prepared under inert atmosphere and analyzed in 10 mm path length quartz J Young cuvettes.

**Computational Methods.** ORCA (version 6.1.0) was used for all quantum chemistry calculations.<sup>7</sup> The experimental coordinates obtained for **4**, <sup>13</sup>**6**, **7**•(toluene)<sub>0.5</sub>, and <sup>13</sup>**8** by SC-XRD were loaded into Mercury (version 2024.2.0) and edited by removing K(~~2.2.2~~.crypt) (in the case of **4** and <sup>13</sup>**6**), solvent molecules (in the case of **7**•(toluene)<sub>0.5</sub>), and disordered components, and normalizing H atoms, to obtain the initial input coordinates for **4**-K(~~2.2.2~~.crypt)<sup>-</sup>, **6**-K(~~2.2.2~~.crypt)<sup>-</sup>, **7**, and **8** (where **4**-K(~~2.2.2~~.crypt)<sup>-</sup> and **6**-K(~~2.2.2~~.crypt)<sup>-</sup> refer to the anionic components of **4** and **6** which do not include the

K(2.2.2.crypt) unit). Initial coordinates for CO<sub>2</sub> and CO were obtained from <sup>13</sup>6 and <sup>13</sup>8, respectively. Coordinates were optimized with the r<sup>2</sup>SCAN-3c composite electronic structure method.<sup>8</sup> Frequency calculations were performed on the resulting optimized coordinates, and no imaginary modes were identified. The optimized coordinates for **8** were used as the start point for a simultaneous, two-dimensional relaxed surface scan along the proposed reaction coordinate for the conversion of **7**+CO to **8**, in which the P–C1 (where C1 is the carbonyl carbon) is extended from 1.675 Å to 2.8 Å, while the P–C3 distance (where C3 is the secondary fluorenyl carbon that binds P in **7**, as displayed in Figure 4) is contracted from 3.53 Å to 1.97 Å. The optimized coordinates near the energy maximum, where the P–C1 distance is 2.425 Å and the P–C3 distance is 2.49 Å was used for a transition state search. A transition state, **TS**, was found; a frequency calculation of **TS** identified a single imaginary mode at –335 cm<sup>-1</sup> which corresponds with the expected reaction coordinate. A single point energy calculation was performed on **TS** for a topological analysis, employing the PBE0 hybrid density functional, Grimme’s D3 dispersion correction with Becke-Johnson damping (D3BJ), treatment of scalar relativistic effects with the exact two-component method (X2C), the x2c-TZVPPall basis set, and the X2C/J auxiliary basis set.<sup>7, 8b, h, 9</sup> Topological analysis was performed within MultiWFN (version 3.7).<sup>10</sup> A second single point energy calculation was performed on **TS** for Natural Bond Orbital (NBO) analysis, employing the PBE0 hybrid density functional, Grimme’s D3 dispersion correction with Becke-Johnson damping (D3BJ), the def2-TZVP basis set, the RIJCOSX approximation, and the def2/J auxiliary basis set.<sup>7</sup> Optimized geometries were visualized in Mercury. Data were visualized in R (version 4.5.2). The following R packages were used in data visualization: ggplot2, tidyverse, gridExtra, ggtext, grid, scales, colorspace, dplyr, patchwork. NBO analysis was performed with the NBO program (version 7.0.7).<sup>11</sup> NBOs were visualized in Jmol (Version 16.3.49). In Figure 4B, positive contour lines (displayed as solid lines) are set at 0.001, 0.002, 0.004, 0.008, 0.01, 0.02, 0.04, 0.08, 0.1, 0.2, 0.4, 0.8, 1, 2, 4, 8, 10, 20, 40, 80, 100, 200, 400, 800, 1000, 2000, 4000, 8000, 10000, 20000, 40000, 80000, and negative contour lines (displayed as dashed lines) set at -0.001, -0.002, -0.004, -0.008, -0.01, -0.02, -0.04, -0.08, -0.1, -0.2, -0.4, -0.8, -1, 2, -4, -8, -10, -20, -40, -80, -100, -200, -400, -800, -1000, -2000, -4000, -8000, -10000, 20000, -40000, -80000.

**Synthesis of 1, 2, and 3.** Dimethyl 5-bromoisophthalate,<sup>12</sup> 1-bromo-3,5-bis(1-hydroxy-1-methylethyl)benzene,<sup>13</sup> 1-bromo-3,5-bis(1-chloro-1-methylethyl)benzene,<sup>14</sup> 2,5-dichloro-2,5-dimethyl-hexane<sup>15</sup>, octamethyloctahydrodibenzofluorene,<sup>1</sup> the ketonic (M<sup>s</sup>FluInd\*)Br precursor (**a**),<sup>1</sup> the olefinic (M<sup>s</sup>FluInd\*)Br precursor (**b**),<sup>1</sup> (M<sup>s</sup>FluInd\*)Br<sup>1</sup>, **1**, **2**, and **3** were prepared following established literature protocols following the overall scheme below (Figure S1).<sup>3</sup>

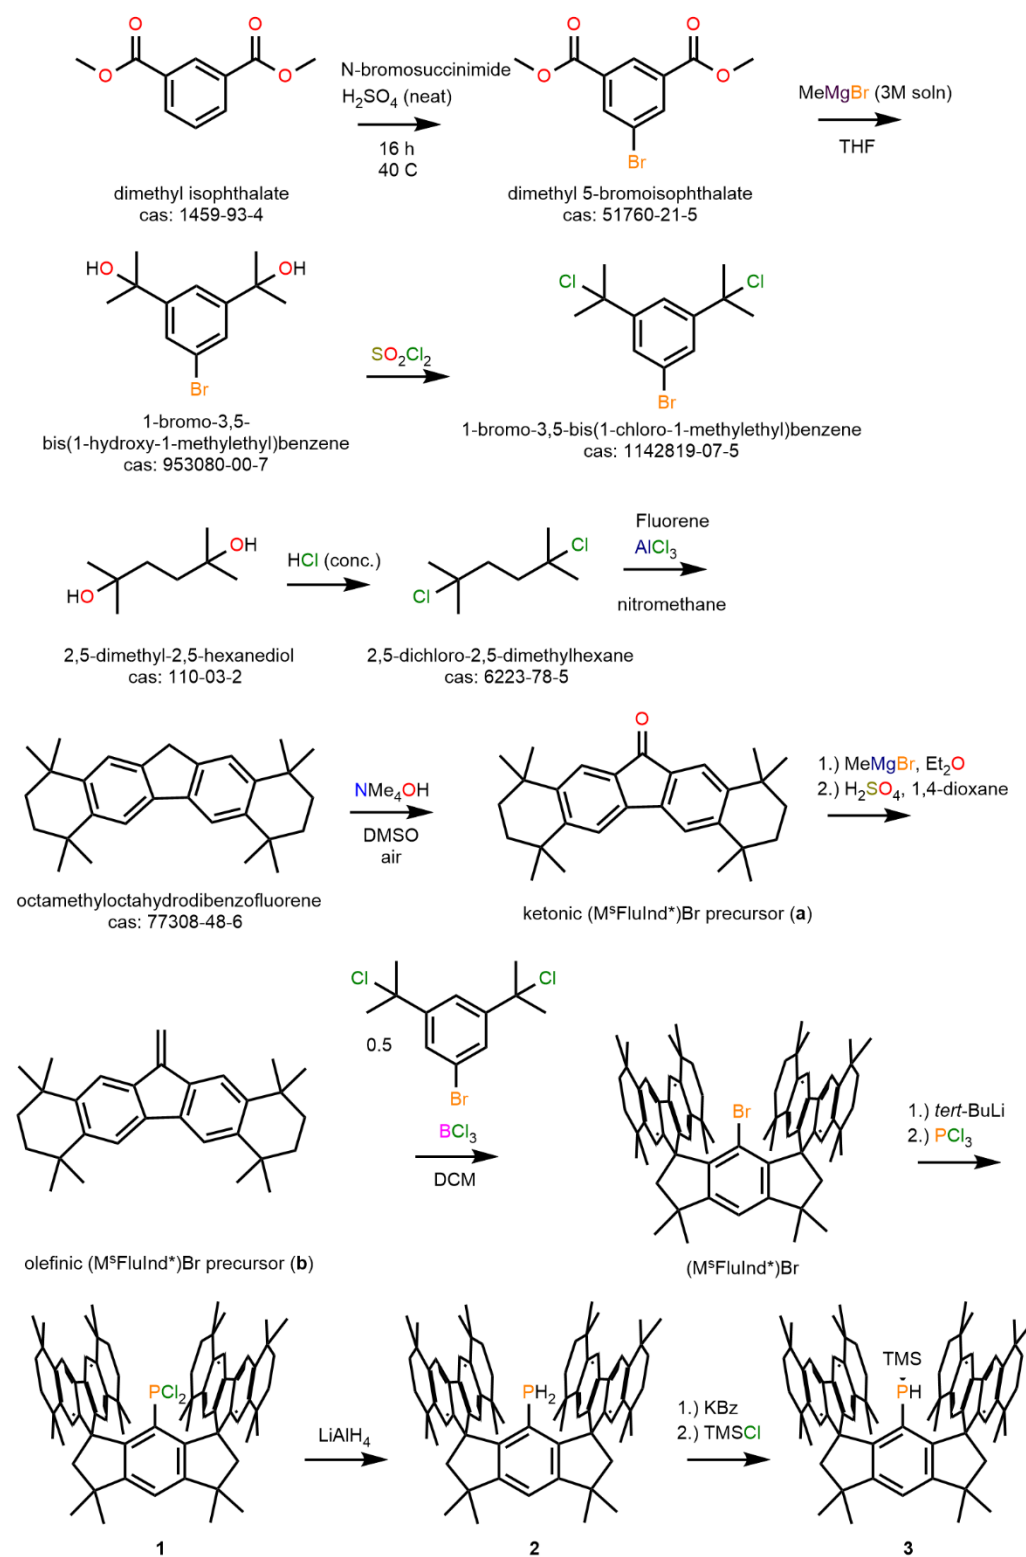

**Figure S1.** Synthetic route to **1**, **2**, and **3**.<sup>1,3</sup>

## 2. Synthesis and characterization of novel compounds.

### 2.1 Synthesis of $[\text{K}(\text{2.2.2.crypt})][(\text{M}^{\text{s}}\text{FluInd}^*)\text{PH}]\cdot(\text{THF})(\text{pentane})_{0.5}$ ( $\mathbf{4}\cdot(\text{THF})(\text{pentane})_{0.5}$ ).

A solution of **2** (246 mg, 249  $\mu\text{mol}$ ) in benzene (8 mL) was added to a suspension of KBz (37 mg, 285  $\mu\text{mol}$ ) in benzene (0.6 mL) and stirred for 2 h. The reaction mixture was filtered through a glass filter pad into a vial containing 2.2.2.cryptandcrypt (94 mg, 249  $\mu\text{mol}$ ). The resulting dark-green solution was stirred for 1 h before being stripped of solvent. The resulting residue was dissolved in THF, and the resulting solution layered with pentane. After 24 h, the vial was cooled to  $-30\text{ }^{\circ}\text{C}$  for an additional 24 h. A large crop of dark-green crystals had formed in the vial, and the supernatant was decanted. The remaining solid was washed with pentane ( $3 \times 0.6\text{ mL}$ ) before being dried under vacuum. Yield: 289 mg (77%). Crystals of **4** suitable for SC-XRD were obtained by vapor diffusion of pentane into a solution of **4** in THF.

**Elemental analysis, Found:** C, 73.83; H, 9.17; N, 1.78%. **Calc.** for  $\text{C}_{96.5}\text{H}_{140}\text{KN}_2\text{O}_7\text{P}$ : C, 76.75; H, 9.34; N, 1.85%. Compound  $\mathbf{4}\cdot(\text{THF})(\text{pentane})_{0.5}$  is highly sensitive and elemental analyses were consistently unsuccessful; best results are provided. Bulk purity of freshly prepared material was determined by  $^1\text{H}$ ,  $^{13}\text{C}\{^1\text{H}\}$ , and  $^{31}\text{P}\{^1\text{H}\}$  NMR spectroscopy.

**HR-ESI-MS (m/z)  $[(\text{M}^{\text{s}}\text{FluInd}^*)\text{PH}_3]^+$**  987.705 (calc. 987.693).

**HR-ESI-MS (m/z)  $[\text{K}(\text{2.2.2.crypt})]^+$**  415.229 (calc. 415.220).

**$^1\text{H}$  NMR (400 MHz,  $\text{C}_6\text{D}_6$ ):**  $\delta = 7.76$  (s, 4H), 7.63 (s, 4H), 6.69 (s, 1H), 3.04 (s, 12H), 2.99 – 2.91 (m, 12H), 2.49 (s, 4H), 2.06 – 1.99 (m, 12H), 1.90 – 1.60 (m, 28H), 1.53 – 1.35 (m, 48H) ppm.

**$^{13}\text{C}\{^1\text{H}\}$  NMR (101 MHz,  $\text{C}_6\text{D}_6$ ):**  $\delta = 155.2, 142.4, 139.7, 138.2, 122.7, 115.9, 70.4, 67.7, 66.9, 63.2, 54.4, 42.3, 36.5, 36.4, 34.9, 34.7, 33.5, 33.1, 32.7, 32.7, 32.5$  ppm.

**$^{31}\text{P}$  NMR (162 MHz,  $\text{C}_6\text{D}_6$ ):**  $\delta = -69.9$  (d,  $^1J_{\text{PH}} = 154.2$  Hz) ppm.

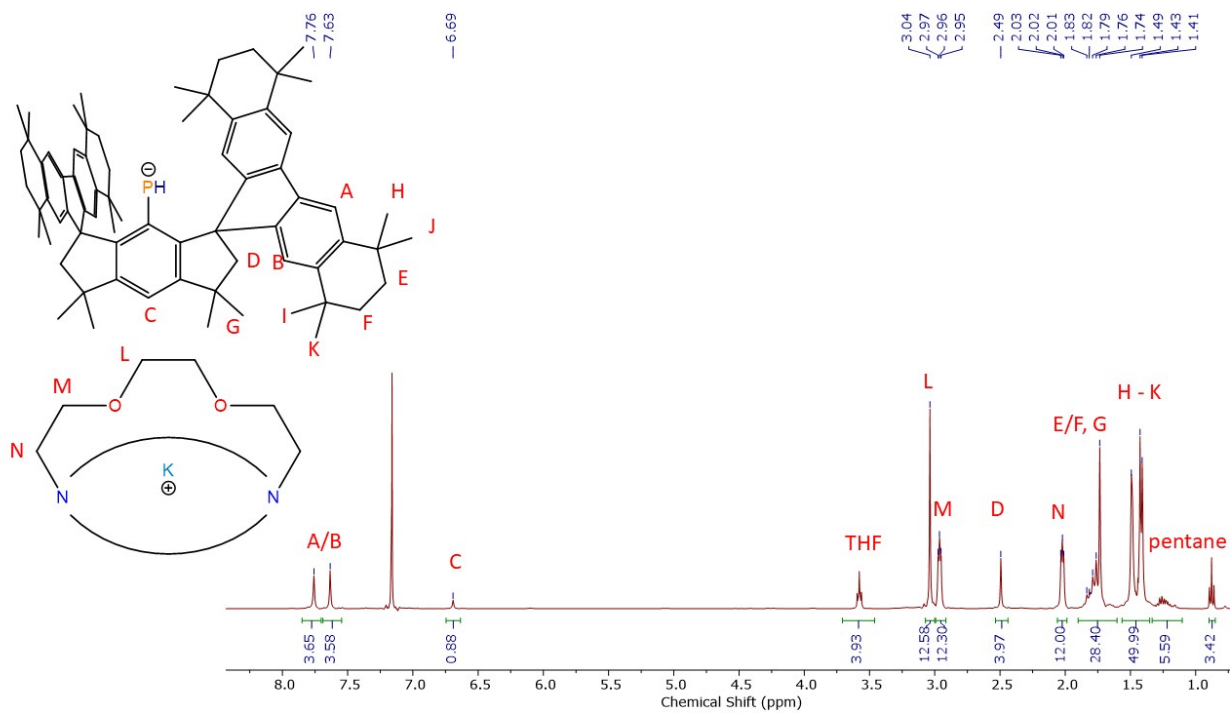

**Figure S2.**  $^1\text{H}$  NMR spectrum ( $\text{C}_6\text{D}_6$ , 400 MHz) of  $4\cdot(\text{THF})(\text{pentane})_{0.5}$  at room temperature.

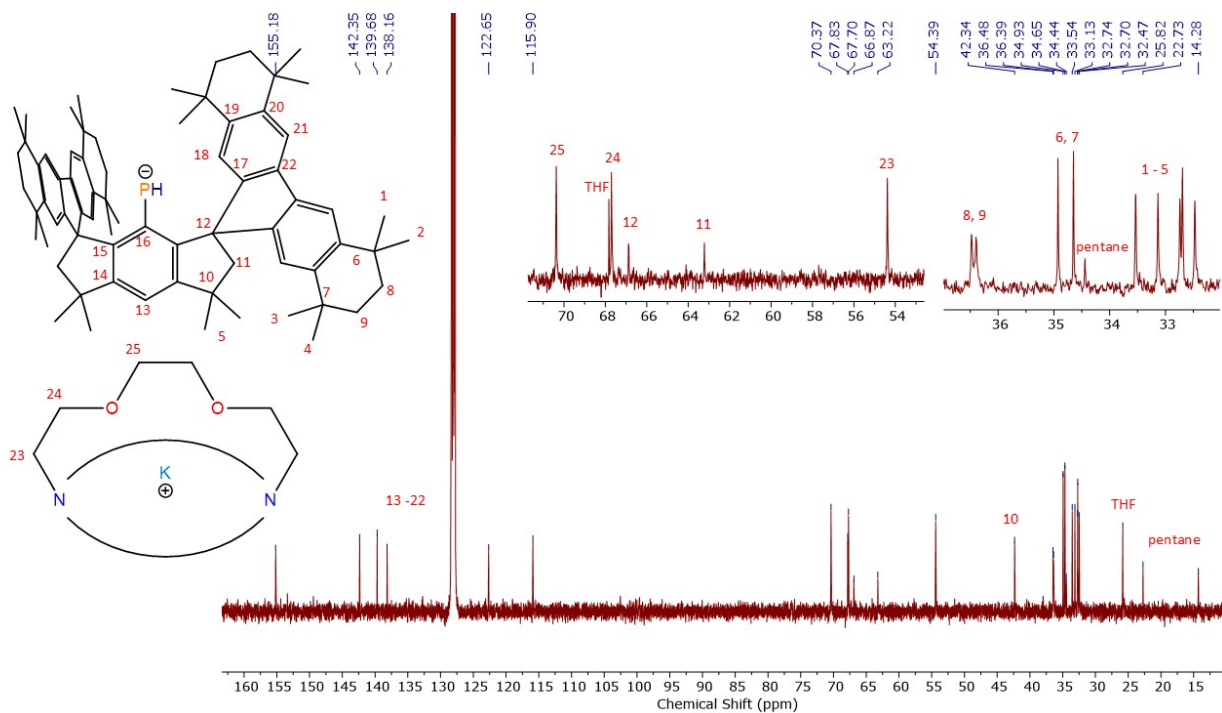

**Figure S3.**  $^{13}\text{C}\{^1\text{H}\}$  NMR spectrum ( $\text{C}_6\text{D}_6$ , 101 MHz)  $4\cdot(\text{THF})(\text{pentane})_{0.5}$  at room temperature.

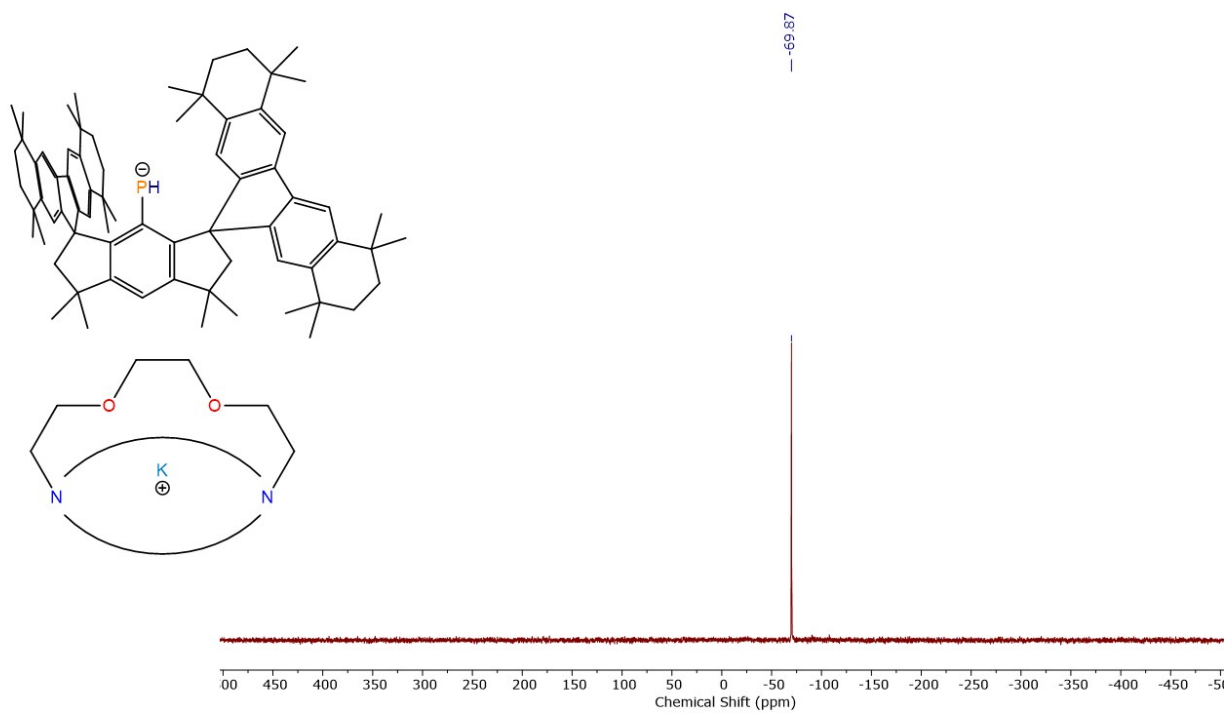

**Figure S4.**  $^{31}\text{P}\{^1\text{H}\}$  NMR spectrum ( $\text{C}_6\text{D}_6$ , 162 MHz) of  $4^{\bullet}(\text{THF})(\text{pentane})_{0.5}$  at room temperature.

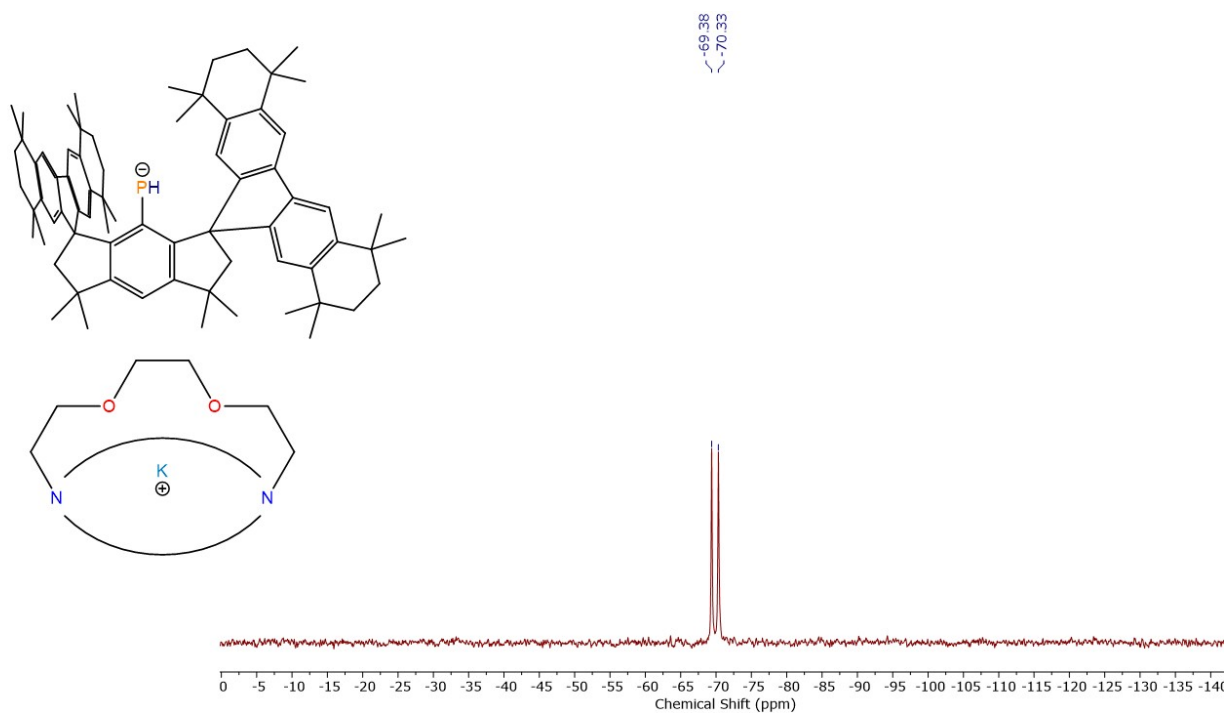

**Figure S5.**  $^{31}\text{P}$  NMR spectrum ( $\text{C}_6\text{D}_6$ , 162 MHz) of  $4^{\bullet}(\text{THF})(\text{pentane})_{0.5}$  at room temperature.

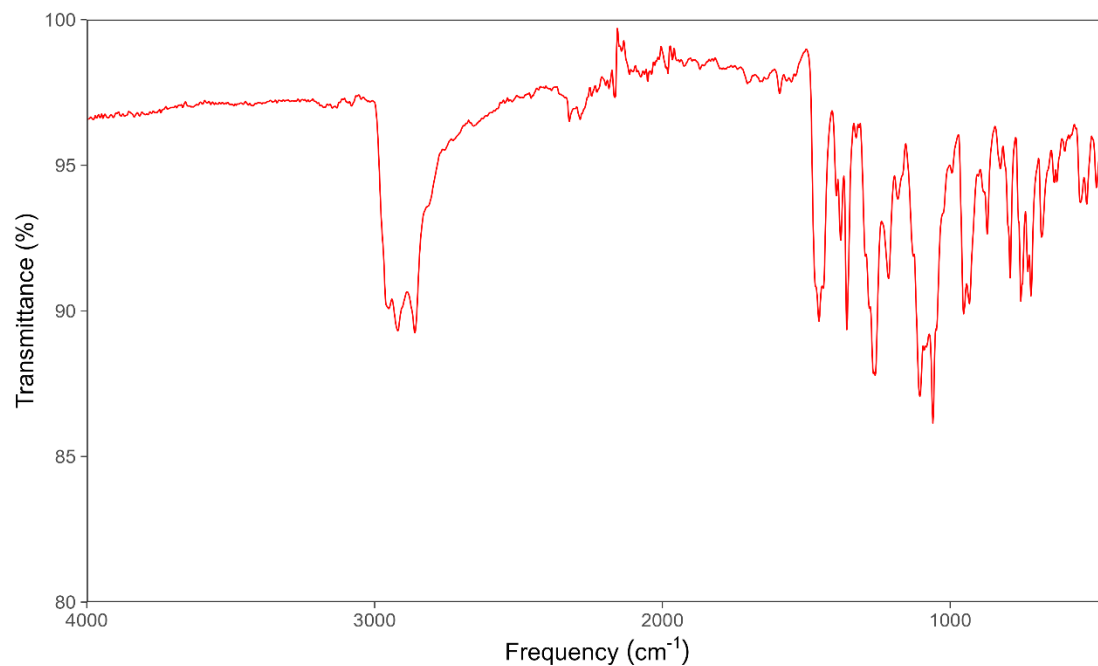

**Figure S6.** Experimental IR spectrum of  $4\bullet(\text{THF})(\text{pentane})_{0.5}$ .

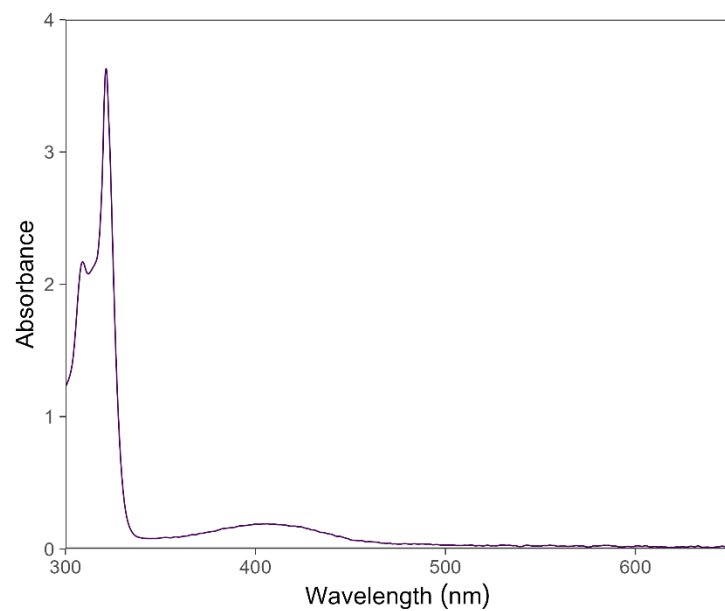

**Figure S7.** Experimental UV-Vis spectrum of  $4\bullet(\text{THF})(\text{pentane})_{0.5}$  (83  $\mu\text{M}$ ).

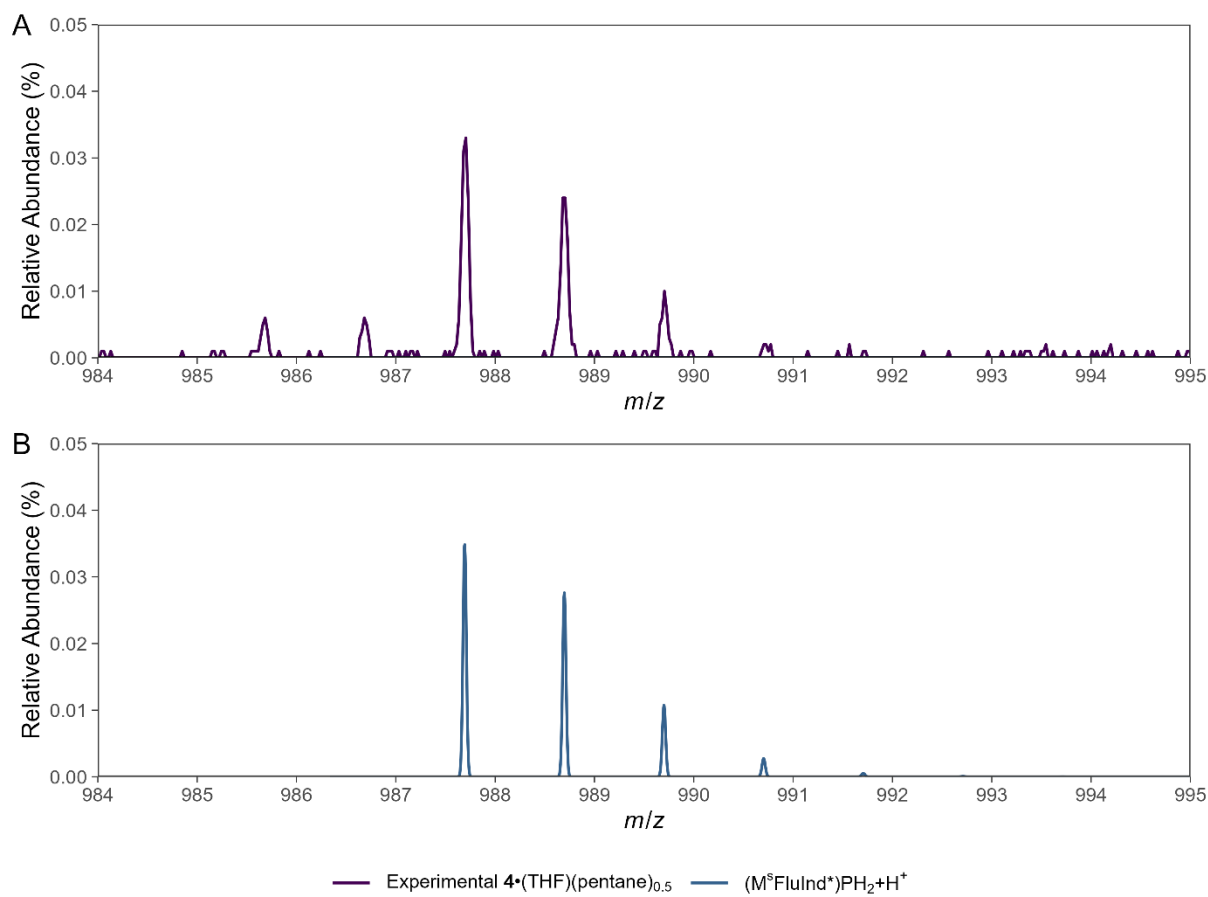

**Figure S8.** (A) Experimental HR-ESI-MS spectrum for 4•(THF)(pentane)<sub>0.5</sub>. (B) Simulated HR-ESI-MS spectrum for (M°FluInd\*)PH<sub>2</sub>+H<sup>+</sup>.

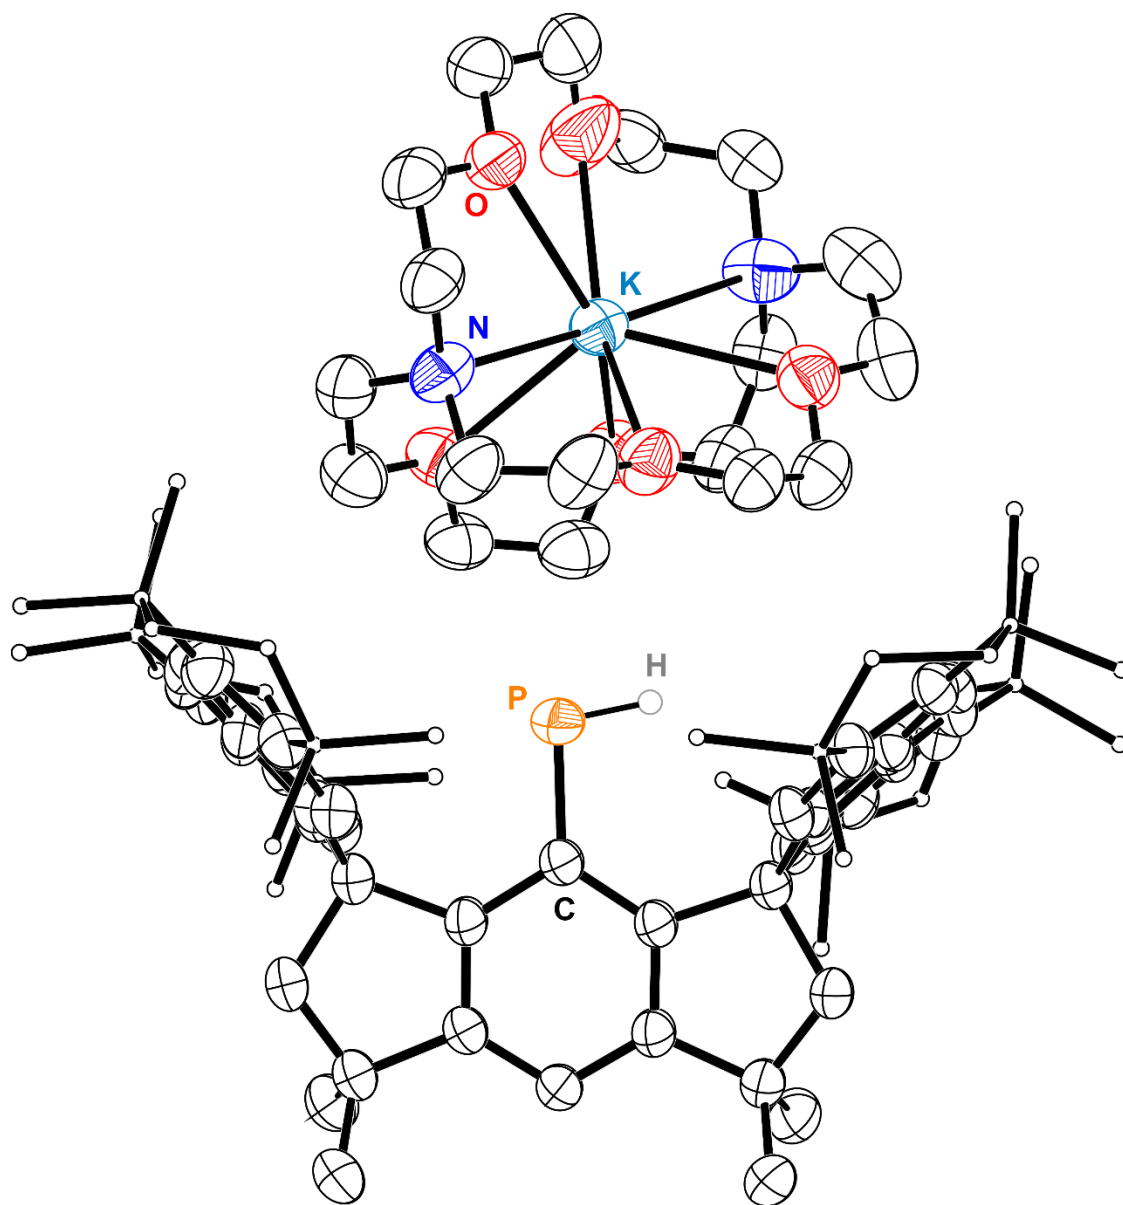

**Figure S9.** Thermal ellipsoid plot (50% probability) of **4**. C-bound H atoms and disordered components are omitted for clarity. Select alkyl C atoms are shown as spheres of arbitrary size for clarity. Color code: P orange, C black, N blue, K teal, H grey.

## 2.2 Synthesis of [K(2.2.2.crypt)][(M<sup>s</sup>FluInd\*)PO<sub>2</sub>H] (5).

A suspension of 4•(THF)(pentane)<sub>0.5</sub> (44 mg, 29 μmol) in benzene (0.6 mL) was filtered and transferred into a J-Young tube. The sample was degassed *via* freeze-pump-thaw three times before being frozen in a liquid N<sub>2</sub> cooling bath. An excess of gaseous N<sub>2</sub>O was transferred to the tube. The reaction mixture was allowed to warm to room temperature, and the tube was inverted three times. The solvent was stripped to afford 5 as a colorless solid. Yield: 36 mg (86%). Crystals suitable for X-ray diffraction were grown from a mixture of THF/pentane.

**Elemental analysis, Found:** C, 74.31; H, 8.87; N, 1.95%. **Calc.** for C<sub>90</sub>H<sub>126</sub>KN<sub>2</sub>O<sub>8</sub>P: C, 75.38; H, 8.86; N, 1.95%.

**HR-ESI-MS (m/z) [5–K(2.2.2.crypt)]<sup>-</sup>** 1017.661 (calc. 1017.668).

**<sup>1</sup>H NMR (500 MHz, C<sub>6</sub>D<sub>6</sub>):** δ = 7.76 (br s, 4H), 7.66 (br s, 4H), 7.47 (br s, 1H), 3.17 (br s, 12H), 3.11 (br s, 12H), 2.31 (br s, 4H), 2.18 (br s, 12H), 1.85 – 1.65 (br m, 16H), 1.59 – 1.29 (br m, 60H) ppm.

**<sup>13</sup>C{<sup>1</sup>H} NMR (126 MHz, C<sub>6</sub>D<sub>6</sub>):** δ = 155.9, 142.6, 140.5, 137.1, 123.5, 116.2, 70.3, 67.8, 66.4, 65.3, 55.0, 41.2, 36.3, 35.1, 34.7, 33.3, 32.9, 32.5, 32.4, 32.1 ppm.

**<sup>31</sup>P NMR (202 MHz, C<sub>6</sub>D<sub>6</sub>):** δ = 1.2 (d, <sup>1</sup>J<sub>PH</sub> = 476.1 Hz) ppm.

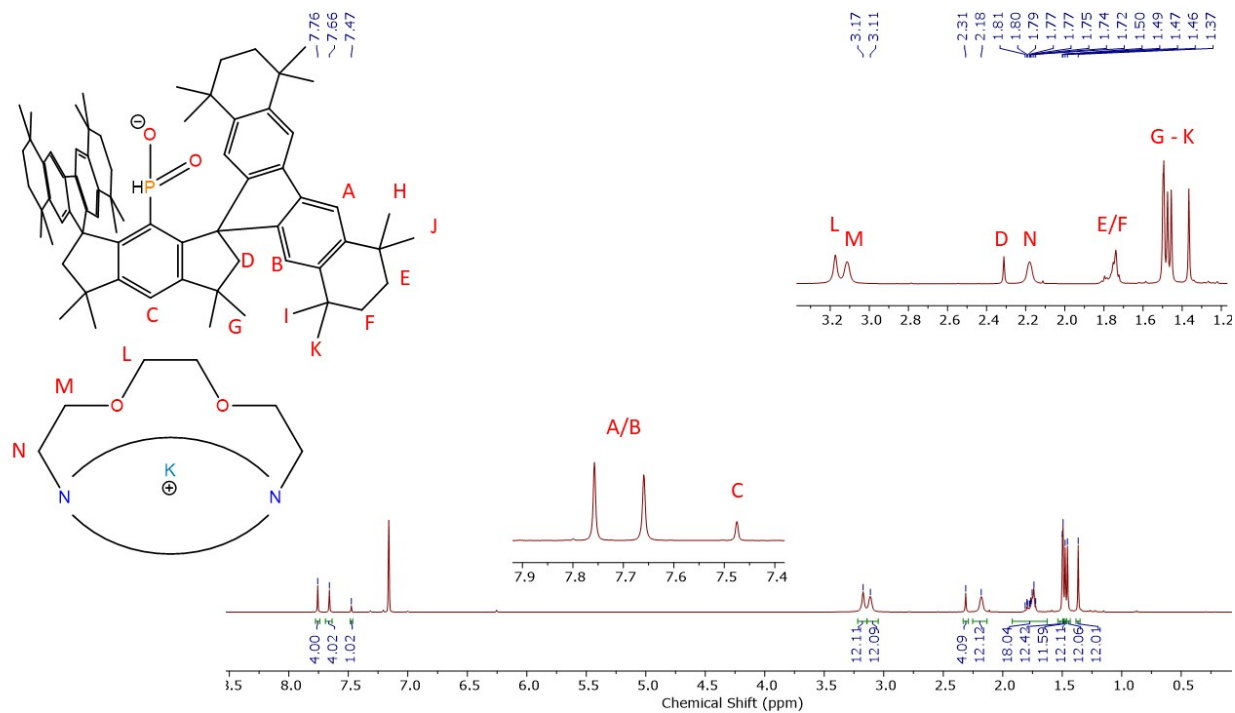

**Figure S10.**  $^1\text{H}$  NMR spectrum ( $\text{C}_6\text{D}_6$ , 500 MHz) of **5** at room temperature.

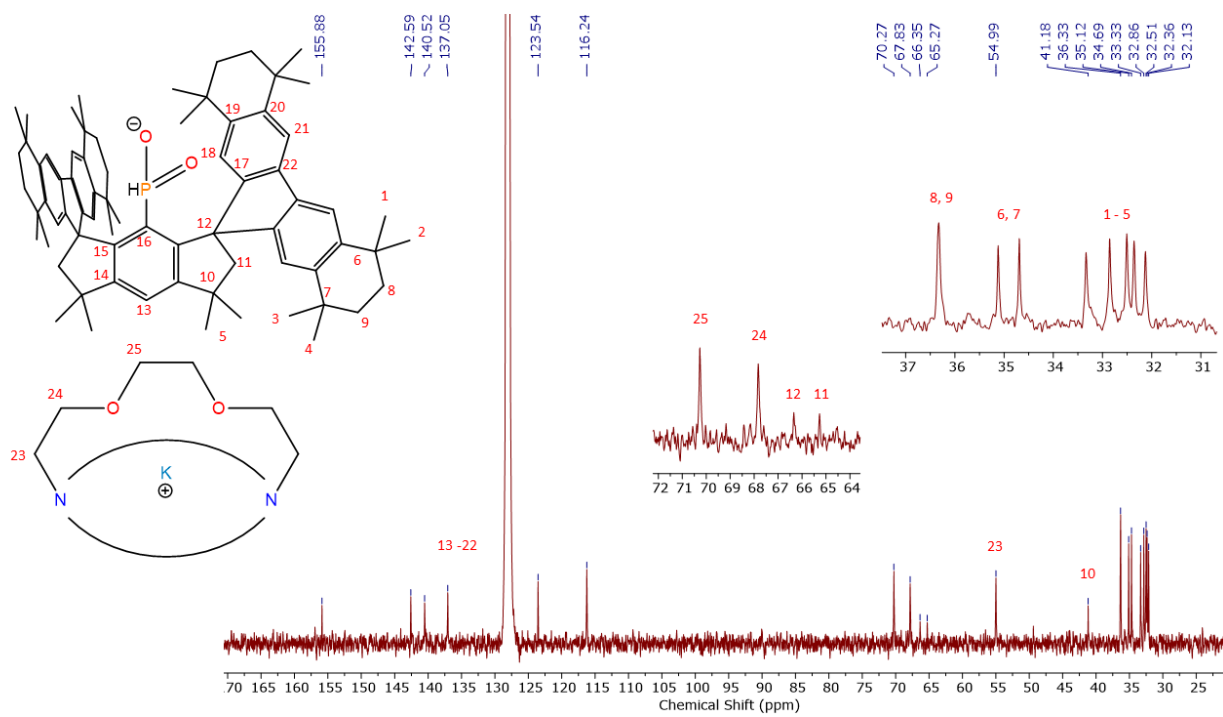

**Figure S11.**  $^{13}\text{C}\{^1\text{H}\}$  NMR spectrum ( $\text{C}_6\text{D}_6$ , 126 MHz) of **5** at room temperature.

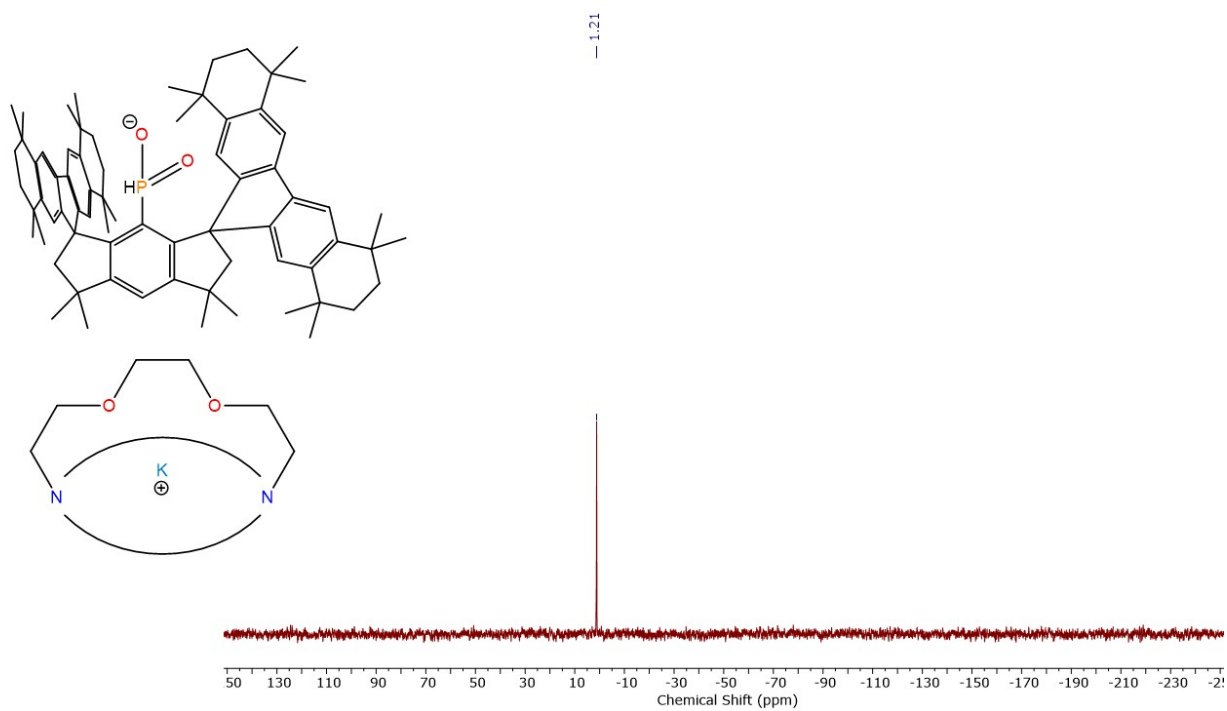

**Figure S12.** <sup>31</sup>P{<sup>1</sup>H} NMR spectrum (C<sub>6</sub>D<sub>6</sub>, 202 MHz) of **5** at room temperature.

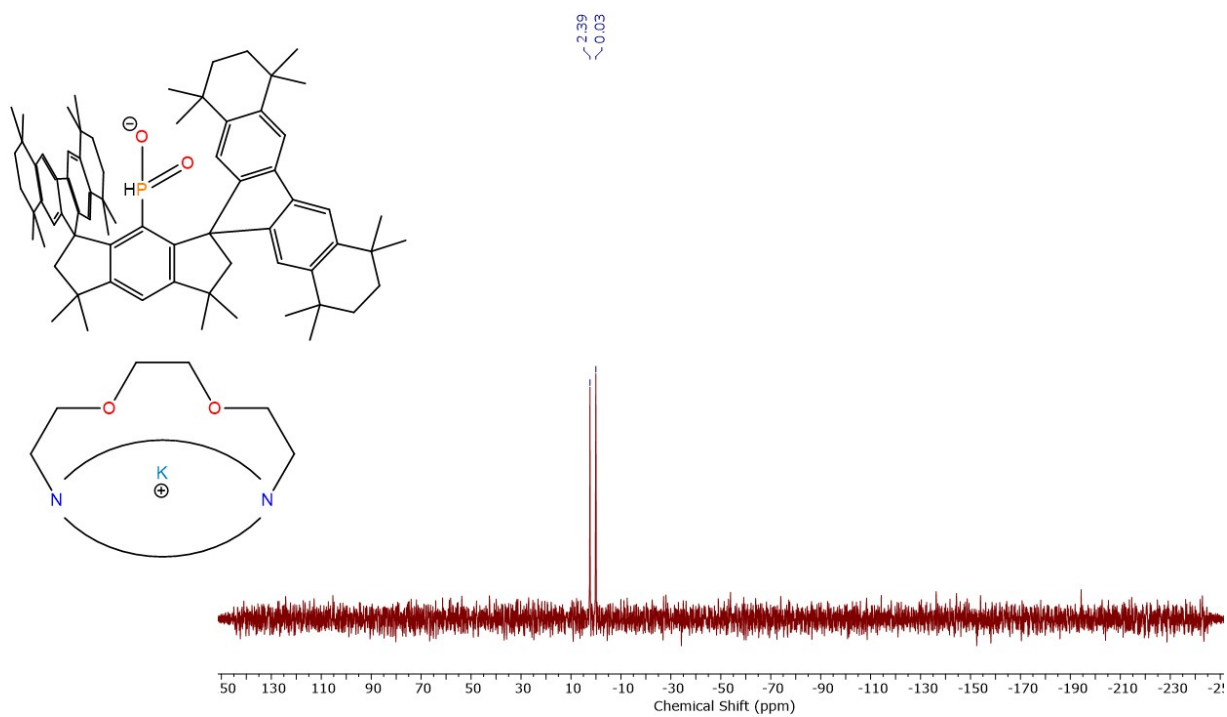

**Figure S13.** <sup>31</sup>P NMR spectrum (C<sub>6</sub>D<sub>6</sub>, 202 MHz) of **5** at room temperature.

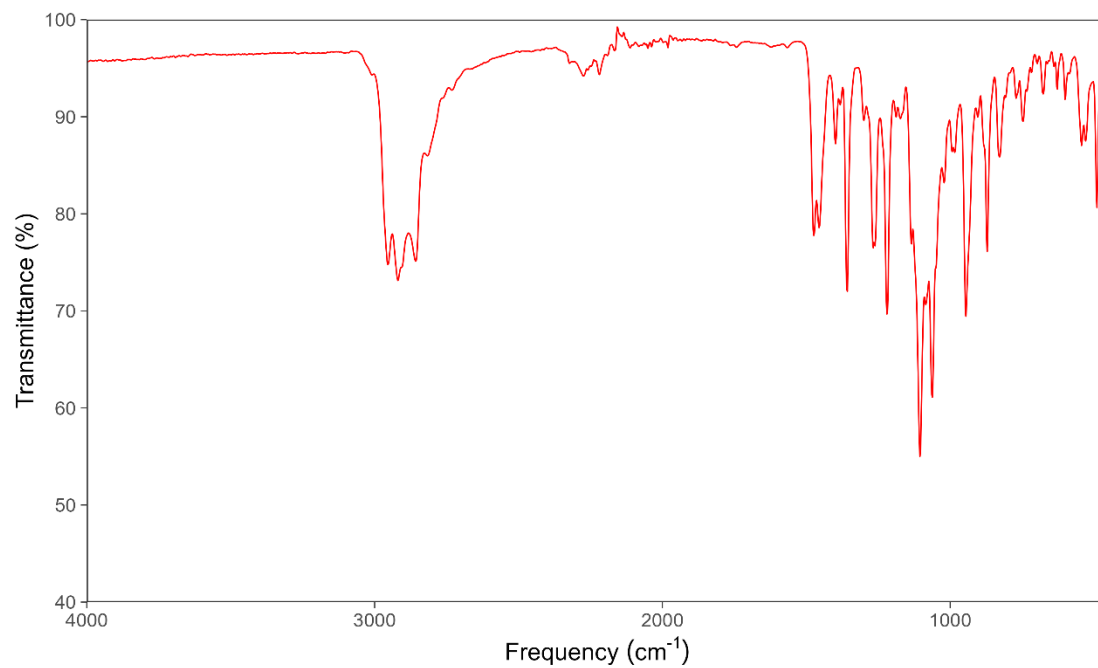

**Figure S14.** Experimental IR spectrum of **5**.

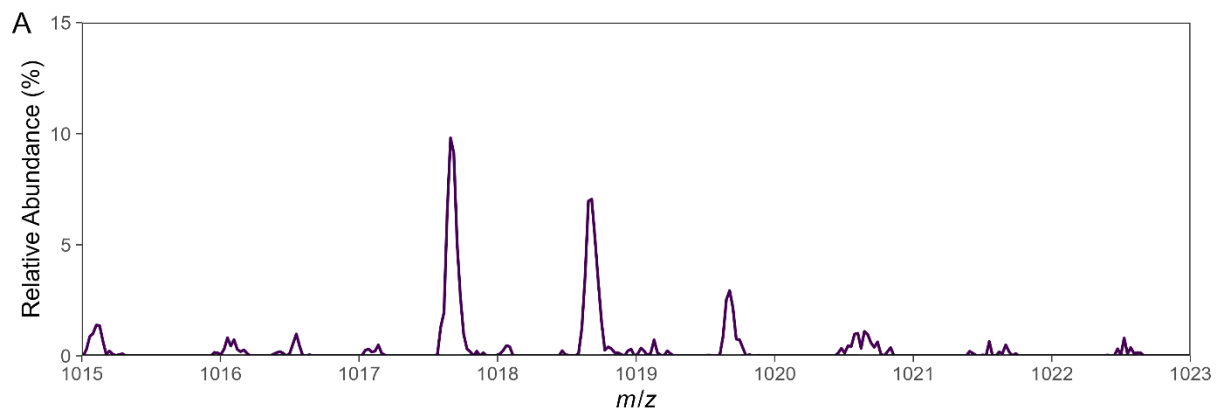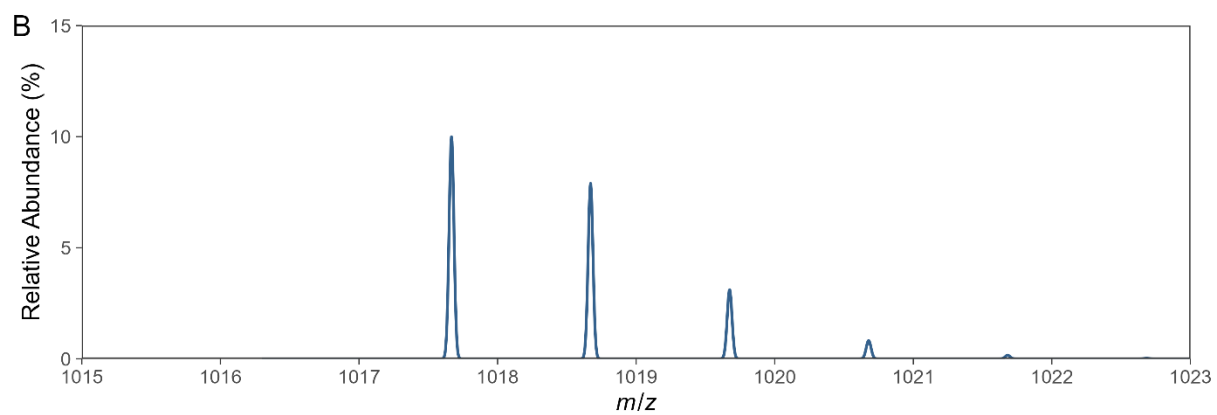

— Experimental 5 — Simulated 5-K(2.2.2.crypt)<sup>-</sup>

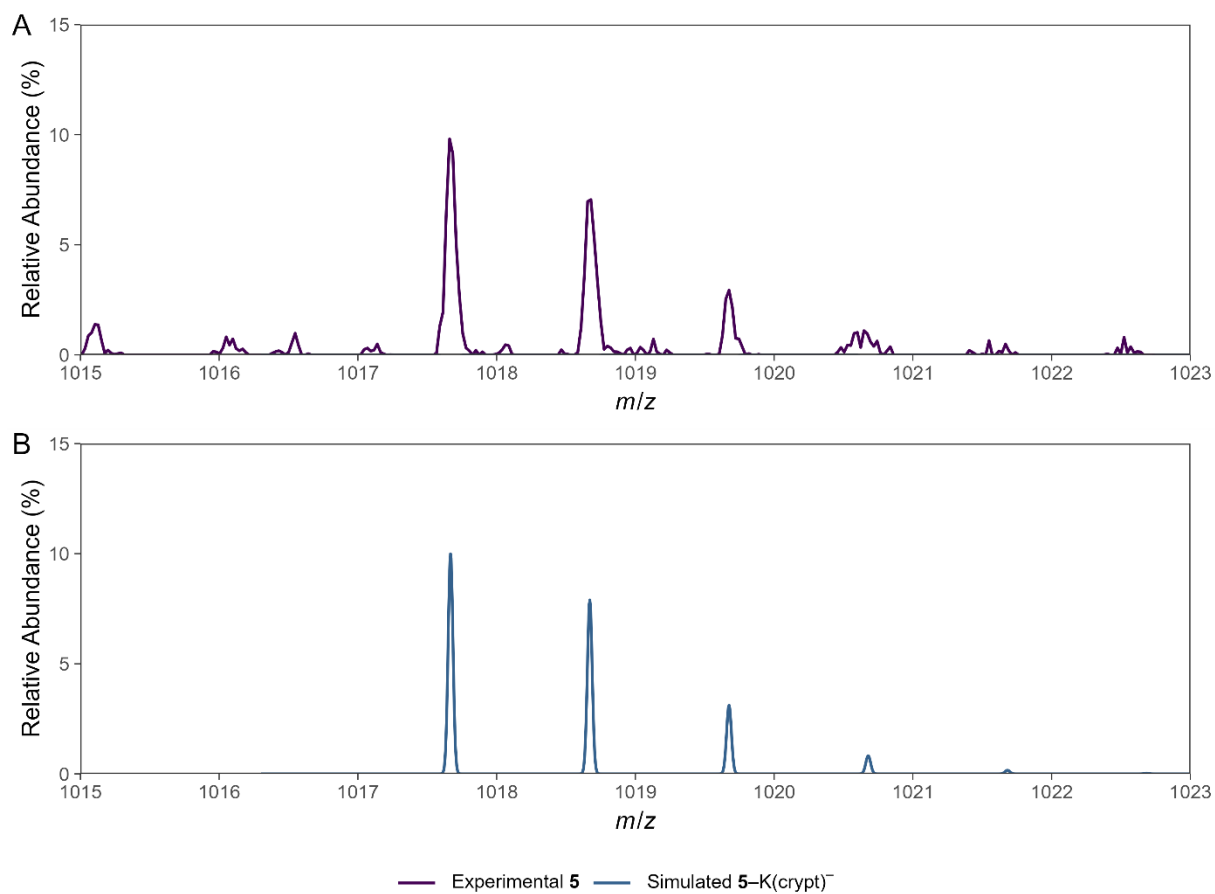

**Figure S15.** (A) Experimental HR-ESI-MS spectrum of **5**. (B) Simulated HR-ESI-MS spectrum for **5**-K(2.2.2.crypt)<sup>-</sup>.

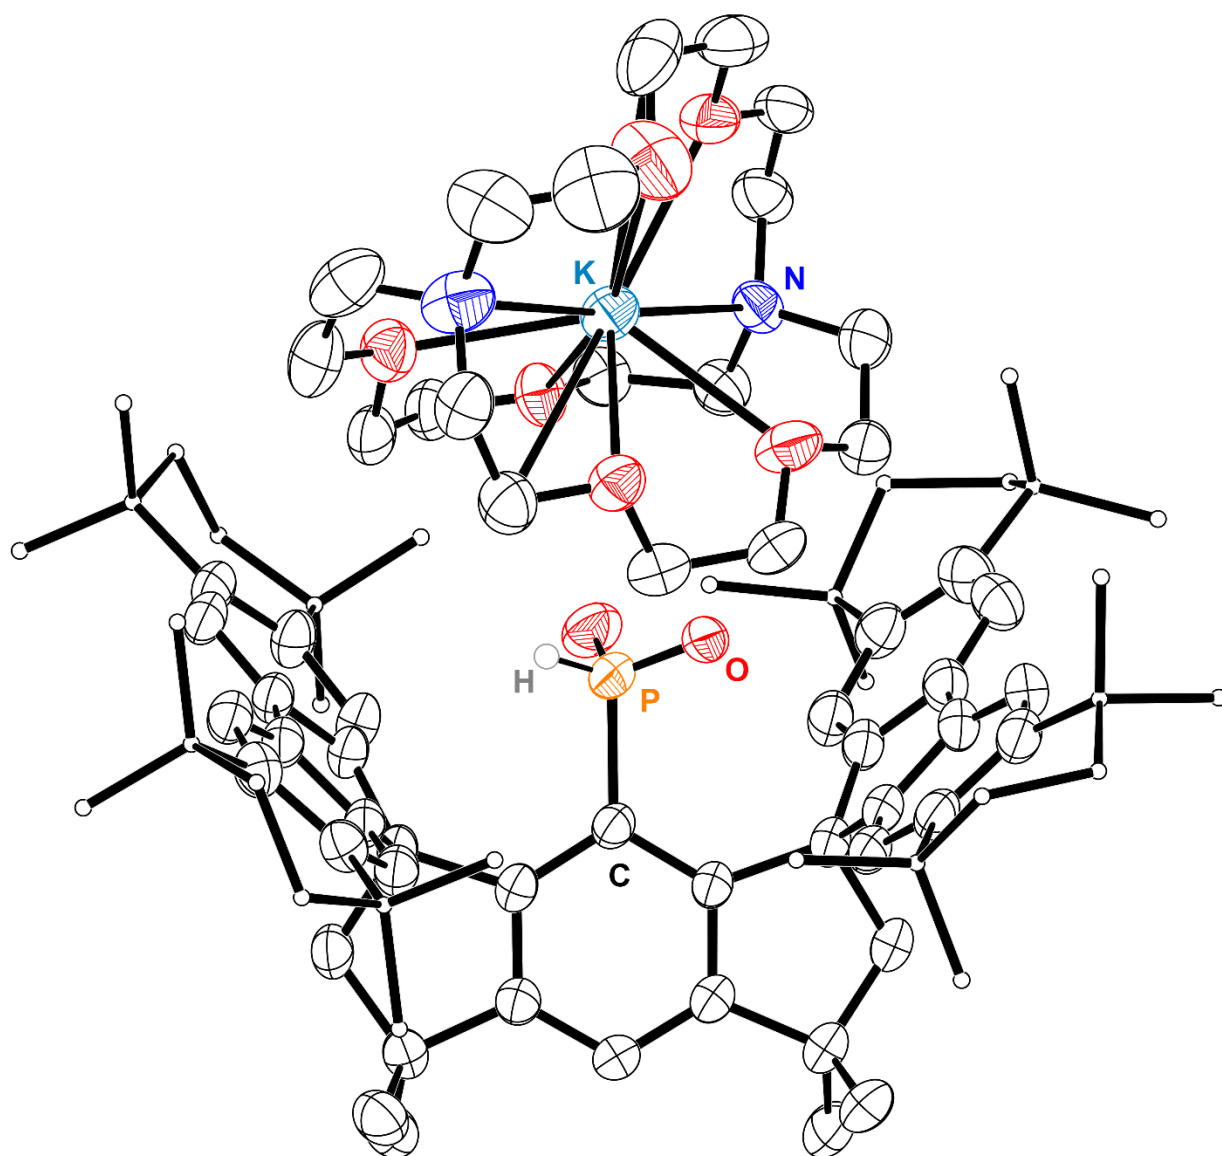

**Figure S16.** Thermal ellipsoid plot (50% probability) of **5**. C-bound H atoms and disordered components are omitted for clarity. Select alkyl C atoms are shown as spheres of arbitrary size for clarity. Color code: P orange, C black, N blue, K teal, H grey, O red.

### 2.3 Synthesis of [K(2.2.2.crypt)][(M<sup>s</sup>FluInd\*)P(CO<sub>2</sub>)H] (<sup>13</sup>6) *in situ*.

A suspension of 4•(THF)(pentane)<sub>0.5</sub> (48 mg, 32 μmol) in benzene was filtered and transferred into a J-Young tube. The sample was degassed *via* freeze-pump-thaw three times. Gaseous <sup>13</sup>CO<sub>2</sub> (1 atm) was transferred to the sample at room temperature. The tube was inverted three times. The resulting sample was analyzed by <sup>1</sup>H, <sup>31</sup>P{<sup>1</sup>H}, <sup>31</sup>P, and <sup>13</sup>C{<sup>1</sup>H} NMR, revealing the presence of both <sup>13</sup>6 and 2. The solvent was stripped to afford a solid mixture containing <sup>13</sup>6 and 2, which was analyzed by IR spectroscopy and HR-ESI-MS. Attempts to isolate <sup>13</sup>6 as a pure bulk material were unsuccessful, and all bulk samples contained significant amounts of the decomposition product, 2. Crystals of <sup>13</sup>6 suitable for X-ray diffraction were grown from a mixture of pentane/toluene.

**Note:** <sup>13</sup>6 was generated *in situ* and was not isolated as a pure, bulk solid due to partial decomposition to form 2.

**HR-ESI-MS (m/z) [6-K]<sup>-</sup>** 1406.939 (calc. 1406.933).

**<sup>1</sup>H NMR (400 MHz, C<sub>6</sub>D<sub>6</sub>):** δ = 7.77 (s, 4H), 7.70 – 7.55 (br m, 4H), 7.44 (s, 1H), 3.27 (s, 12H), 3.16 (br s, 12H), 2.24 (br s, 12H), 1.90 – 1.76 (br m, 8H), 1.74 – 1.65 (br m, 8H), 1.57 – 1.35 (br m, 65 H) ppm.

**<sup>13</sup>C{<sup>1</sup>H} NMR (101 MHz, C<sub>6</sub>D<sub>6</sub>):** δ = 168.0, 156.8, 156.2, 154.2, 141.1, 138.8, 137.3, 122.3, 117.4, 116.3, 116.1, 70.5, 68.1, 66.4, 64.2, 55.2, 42.0, 36.3, 36.3, 35.2, 34.8, 33.4, 33.3, 32.9, 32.4, 32.3, 32.3 ppm.

**<sup>31</sup>P NMR (162 MHz, C<sub>6</sub>D<sub>6</sub>):** δ = -85.5 (d, <sup>1</sup>J<sub>PH</sub> = 221.7 Hz) ppm.

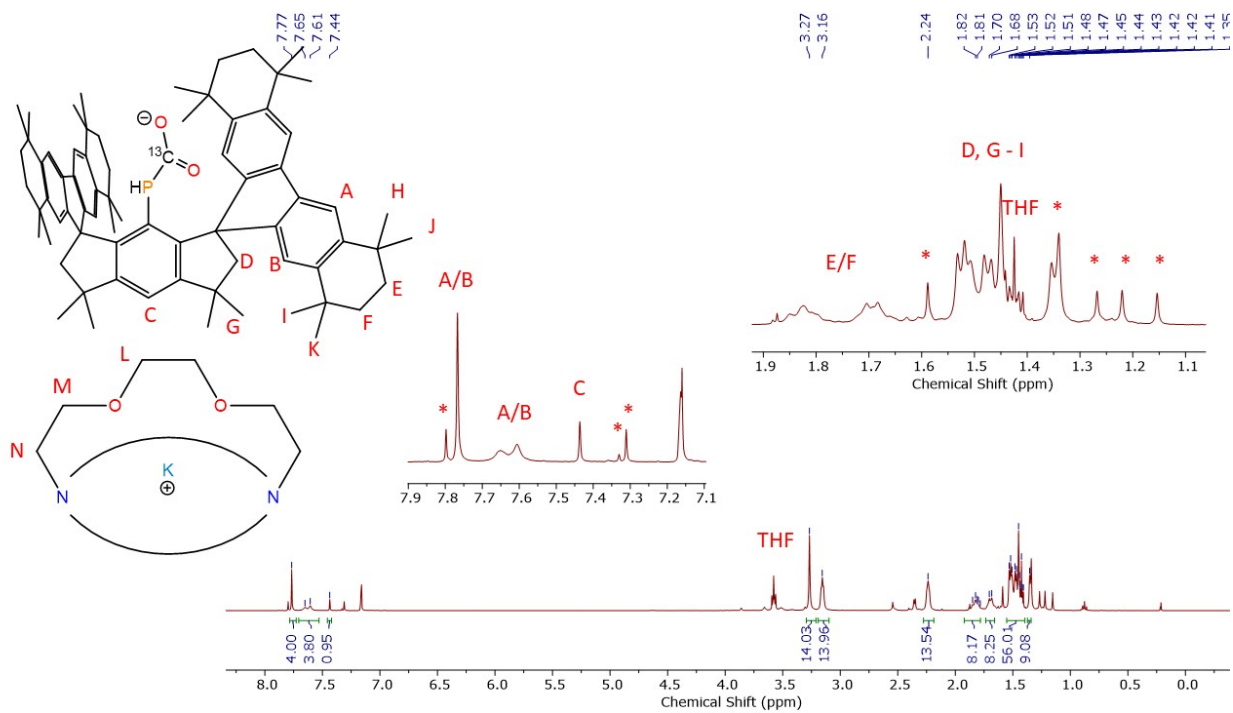

**Figure S17.**  $^1\text{H}$  NMR spectrum ( $\text{C}_6\text{D}_6$ , 400 MHz) of a mixture of  $^{13}\text{C}$ **6** and **2** at room temperature, formed *in situ* by treatment of  $4\cdot(\text{THF})(\text{pentane})_{0.5}$  with  $^{13}\text{CO}_2$ . Signals arising from compound **2** are labelled with an asterisk.

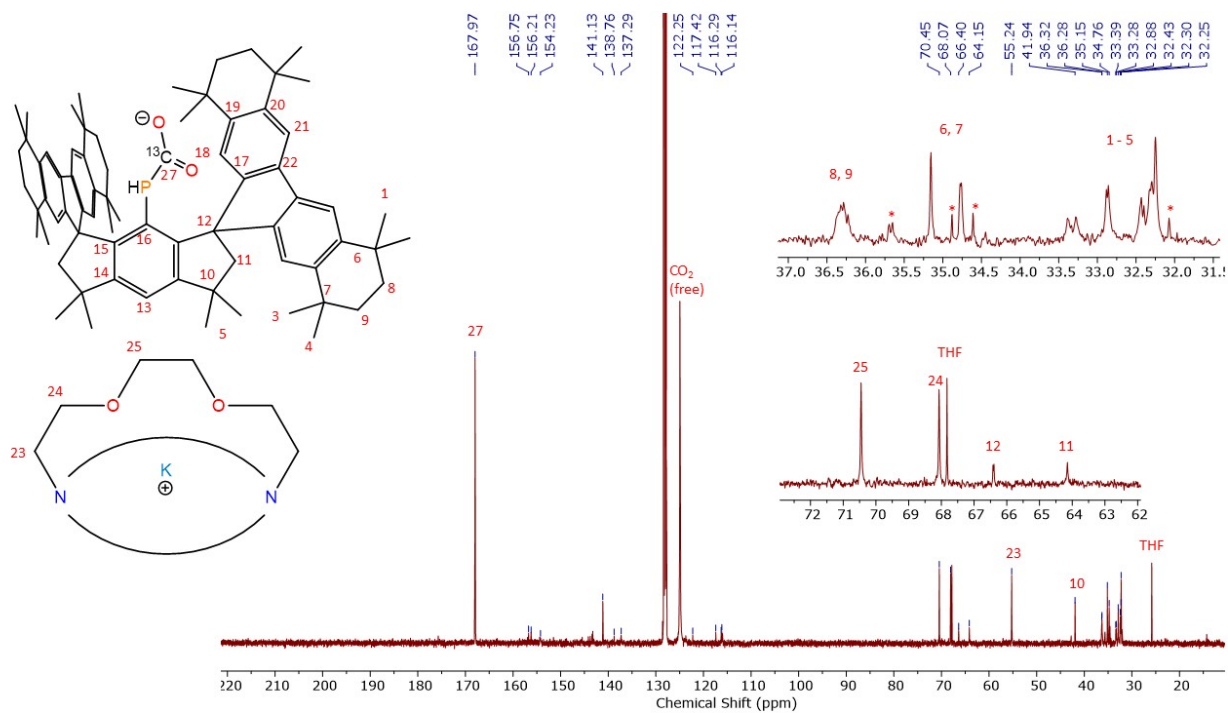

**Figure S18.**  $^{13}\text{C}\{^1\text{H}\}$  NMR spectrum ( $\text{C}_6\text{D}_6$ , 101 MHz) of a mixture of  $^{13}\mathbf{6}$  and  $\mathbf{2}$  at room temperature, formed *in situ* by treatment of  $\mathbf{4}\cdot(\text{THF})(\text{pentane})_{0.5}$  with  $^{13}\text{CO}_2$ . Signals arising from compound  $\mathbf{2}$  are labelled with an asterisk.

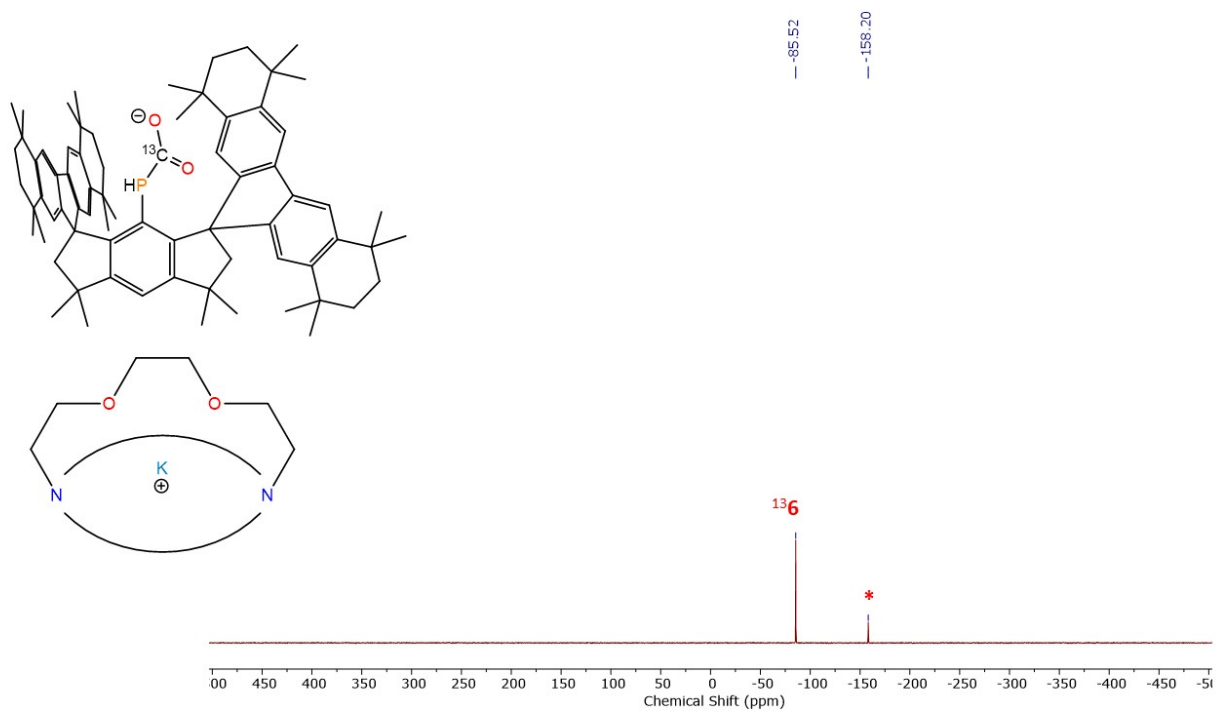

**Figure S19.**  $^{31}\text{P}\{^1\text{H}\}$  NMR spectrum ( $\text{C}_6\text{D}_6$ , 162 MHz) of a mixture of  $^{13}\mathbf{6}$  and  $\mathbf{2}$  at room temperature, formed *in situ* by treatment of  $\mathbf{4}\cdot(\text{THF})(\text{pentane})_{0.5}$  with  $^{13}\text{CO}_2$ . The signal arising from compound  $\mathbf{2}$  is labelled with an asterisk.

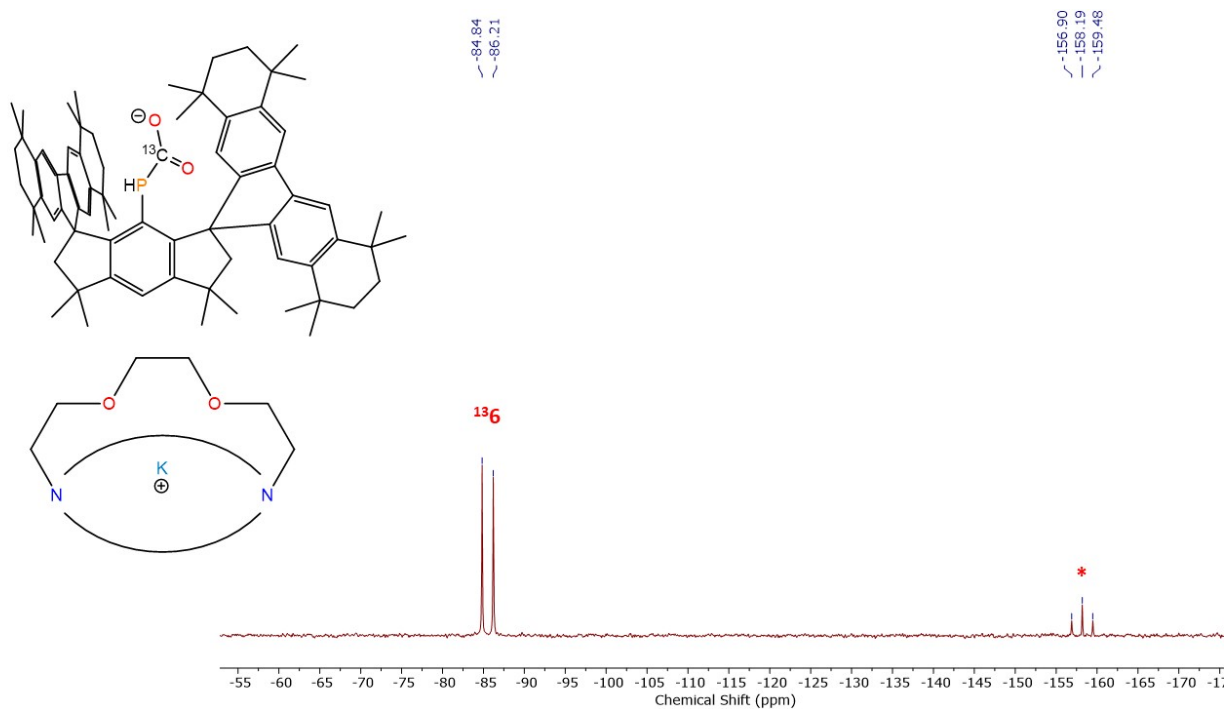

**Figure S20.**  $^{31}\text{P}$  NMR spectrum ( $\text{C}_6\text{D}_6$ , 162 MHz) of a mixture of  $^{136}$  and **2** at room temperature, formed *in situ* by treatment of  $4 \cdot (\text{THF})(\text{pentane})_{0.5}$  with  $^{13}\text{CO}_2$ . The signal arising from compound **2** is labelled with an asterisk.

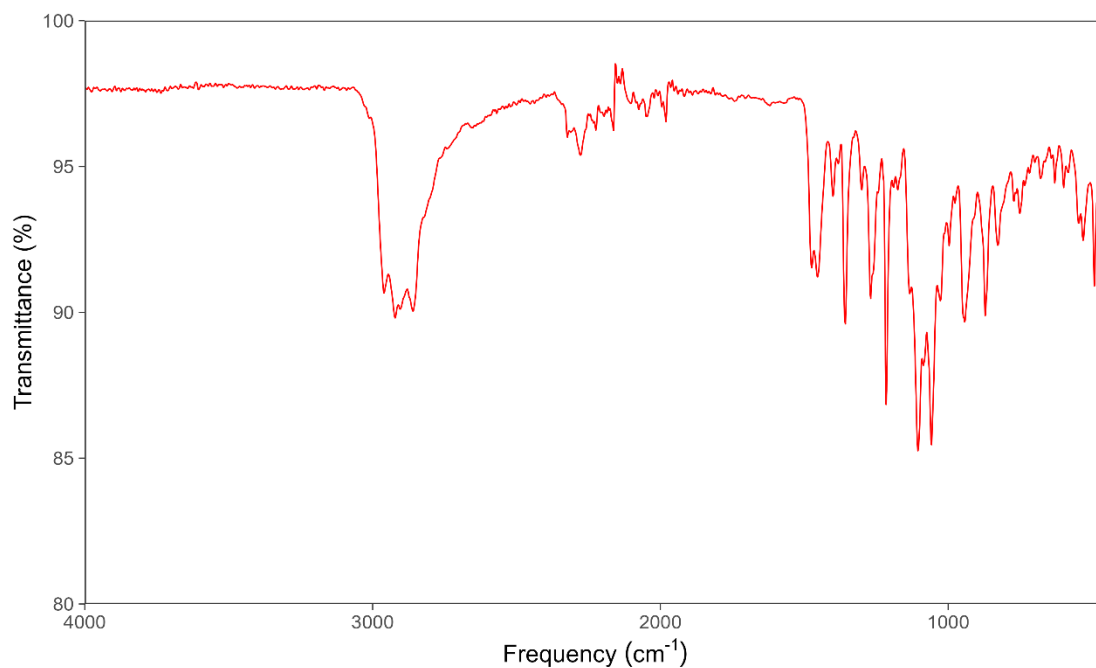

**Figure S21.** Experimental IR spectrum of a mixture of  $^{136}$  and **2** at room temperature, formed by treatment of  $4 \cdot (\text{THF})(\text{pentane})_{0.5}$  with  $^{13}\text{CO}_2$ .

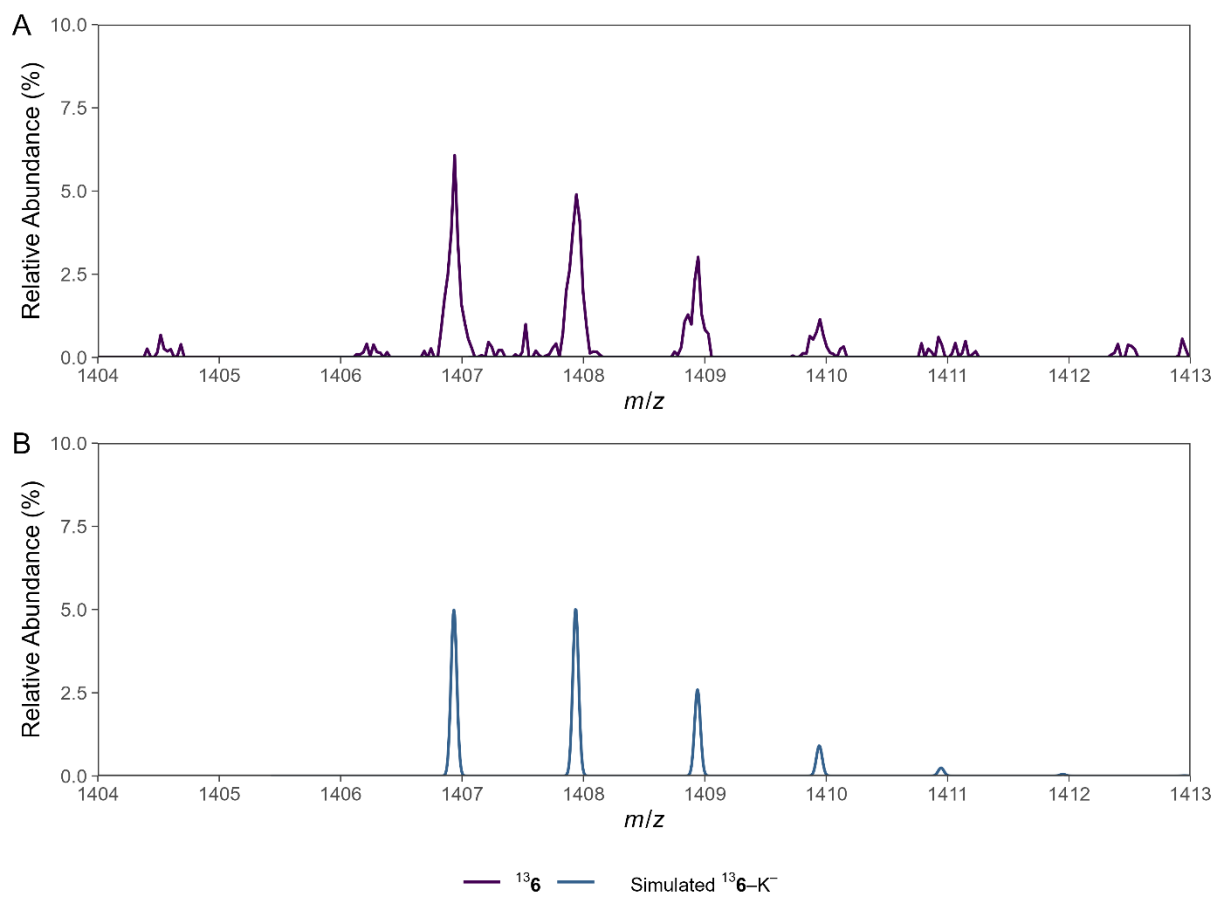

**Figure S22.** (A) Experimental HR-ESI-MS spectrum of a mixture of  $^{13}\mathbf{6}$  and  $\mathbf{2}$  at room temperature, formed by treatment of  $\mathbf{4}\cdot(\text{THF})(\text{pentane})_{0.5}$  with  $^{13}\text{CO}_2$ . (B) Simulated HR-ESI-MS spectrum for  $^{13}\mathbf{6-K}^-$ .

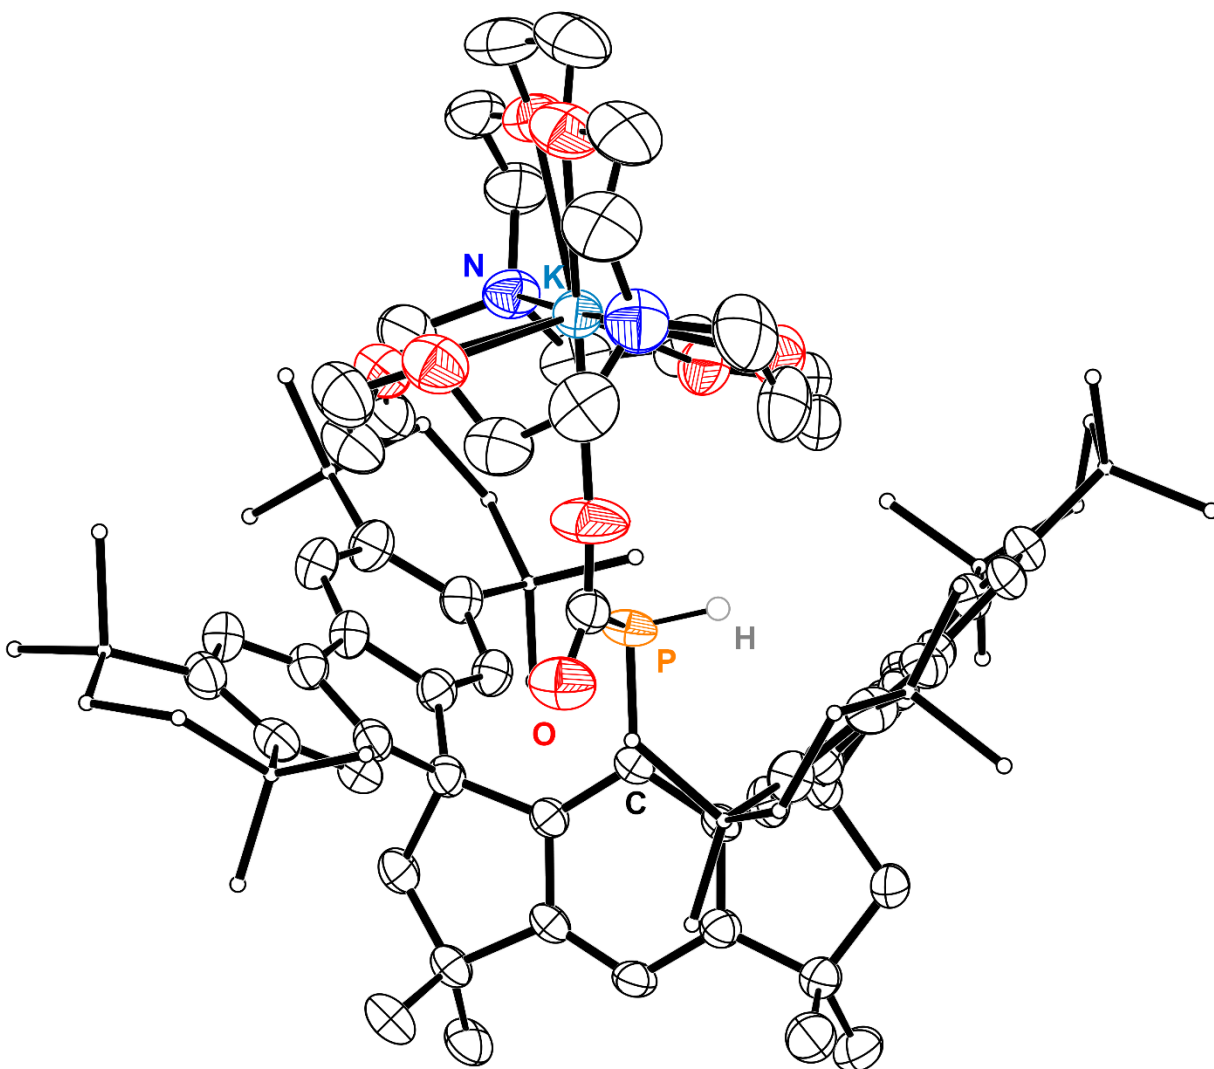

**Figure S23.** Thermal ellipsoid plot (50% probability) of **136**. C-bound H atoms and disordered components are omitted for clarity. Select alkyl C atoms are shown as spheres of arbitrary size for clarity. Color code: P orange, C black, N blue, K teal, H grey, O red.

## 2.4 Synthesis of (M<sup>s</sup>FluInd\*)P (**7**).

**Method A.** A solid mixture of **3**•(Et<sub>2</sub>O)<sub>2</sub> (33 mg, 27.3 μmol) and KBz (6.1 mg, 47 μmol) was suspended in C<sub>6</sub>D<sub>6</sub> (1 mL) and stirred for 2 h. The reaction mixture was filtered through a glass filter pad and transferred to a J-Young tube. The sample was degassed via freeze-pump-thaw before being frozen in a liquid N<sub>2</sub> cooling bath. An excess of gaseous N<sub>2</sub>O was transferred to the tube. The reaction mixture was allowed to warm to room temperature, and the tube was inverted three times. The resulting sample was analyzed with <sup>1</sup>H and <sup>31</sup>P{<sup>1</sup>H} NMR spectroscopy, confirming the quantitative formation of **7**, *in situ* (Supplementary Figures S27, S28). The solvent was then removed and the solid was dissolved in hexane, filtered, and stripped of solvent to afford **7** as a yellow-orange powder. Yield: 16 mg (59%). Crystals of **7**•(toluene)<sub>0.5</sub> suitable for X-ray diffraction were grown from a concentrated mixture of hexane/toluene.

**Method B.** A vial was loaded with **1** (300 mg, 284 μmol), KC<sub>8</sub> (78 mg, 577 μmol), and a stir bar before being cooled to –30 °C. An aliquot of THF (6 mL) at –30 °C was transferred to the solids and the mixture was stirred at room-temperature for 20 h. The solvent was stripped and the dark residue was extracted with benzene (5 mL) and filtered through a glass filter pad. The resulting filtrate was stripped of solvent to afford **7** as a yellow-orange solid. Yield: 226 mg (81%).

**Elemental analysis, Found:** C, 82.55; H, 8.44%. **Calc.** for C<sub>72</sub>H<sub>89</sub>P: C, 87.75; H, 9.10%. Compound **7** is highly sensitive, and elemental analyses were consistently unsuccessful; best results are provided. Bulk purity of freshly prepared material was determined by <sup>1</sup>H, <sup>13</sup>C{<sup>1</sup>H}, and <sup>31</sup>P NMR spectroscopy and the composition of **7** was confirmed by HR-ESI-MS.

**HR-ESI-MS (m/z) [7+H]<sup>+</sup>** 985.683 (calc. 985.677).

**<sup>1</sup>H NMR (400 MHz, C<sub>6</sub>D<sub>6</sub>):** δ = 7.96 (s, 1H), 7.84 (s, 1H), 7.61 (s, 1H), 7.60 (s, 1H), 7.40 (s, 1H), 7.34 (s, 1H), 7.06 (s, 1H), 6.43 (s, 1H), 2.95 (s, 1H), 2.68 (d, J = 13.8 Hz, 1H), 2.44 (d, J = 13.8 Hz, 1H), 2.12 (d, J = 12.8 Hz, 1H), 1.97 (d, J = 13.0 Hz, 1H), 1.80 (s, 3H), 1.75 (s, 3H), 1.73-1.40 (m, 19H), 1.39 (s, 3H), 1.38 (s, 3H), 1.33 (s, 3H), 1.32 (s, 3H), 1.30 (s, 3H), 1.27 (s, 3H), 1.23 (s, 3H), 1.19 (s, 3H), 1.12 (s, 3H), 1.12 (s, 3H), 1.11 (s,

3H), 1.11 (s, 3H), 1.06 (s, 3H), 1.04 (s, 3H), 0.97 (s, 3H), 0.95 (s, 3H), 0.84 (s, 3H), 0.79 (s, 3H) ppm.

$^{13}\text{C}\{^1\text{H}\}$  NMR (101 MHz,  $\text{C}_6\text{D}_6$ ):  $\delta$  = 156.9, 155.9, 153.8, 152.7, 152.7, 152.5, 149.5, 144.8, 144.0, 143.8, 143.8, 143.7, 143.4, 139.0, 139.0, 137.7, 137.1, 137.0, 134.0, 122.6, 122.4, 122.3, 119.9, 117.7, 117.3, 115.9, 111.5, 67.3, 62.8, 57.9, 54.8, 49.9, 43.7, 36.1, 35.9, 35.8, 35.8, 35.7, 35.7, 35.6, 35.3, 35.0, 35.0, 34.9, 34.8, 34.8, 34.6, 34.5, 34.4, 33.7, 33.1, 32.8, 32.6, 32.5, 32.5, 32.4, 32.3, 32.2, 32.2, 32.1, 31.8, 31.8, 31.7, 31.6, 29.5, 29.5, 29.2, 28.4, 27.1 ppm.

$^{31}\text{P}$  NMR (162 MHz,  $\text{C}_6\text{D}_6$ ):  $\delta$  = -153.0 (s) ppm.

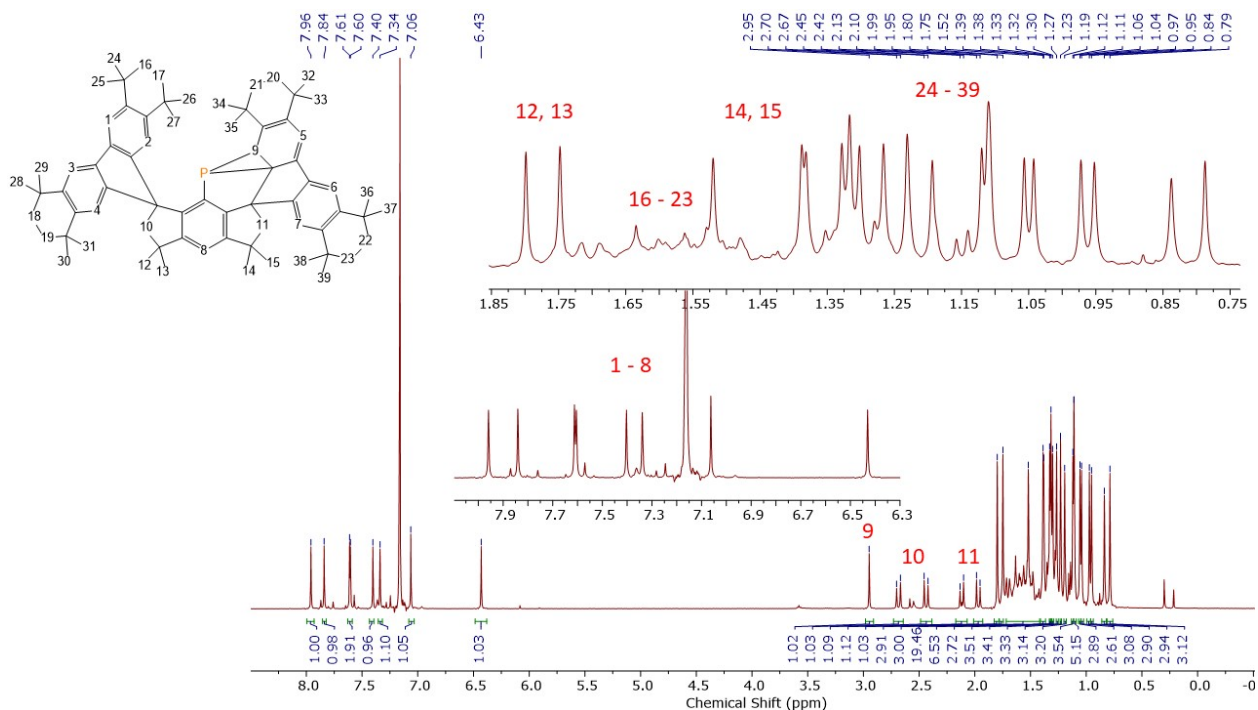

Figure S24.  $^1\text{H}$  NMR spectrum ( $\text{C}_6\text{D}_6$ , 400 MHz) of **7** at room temperature.

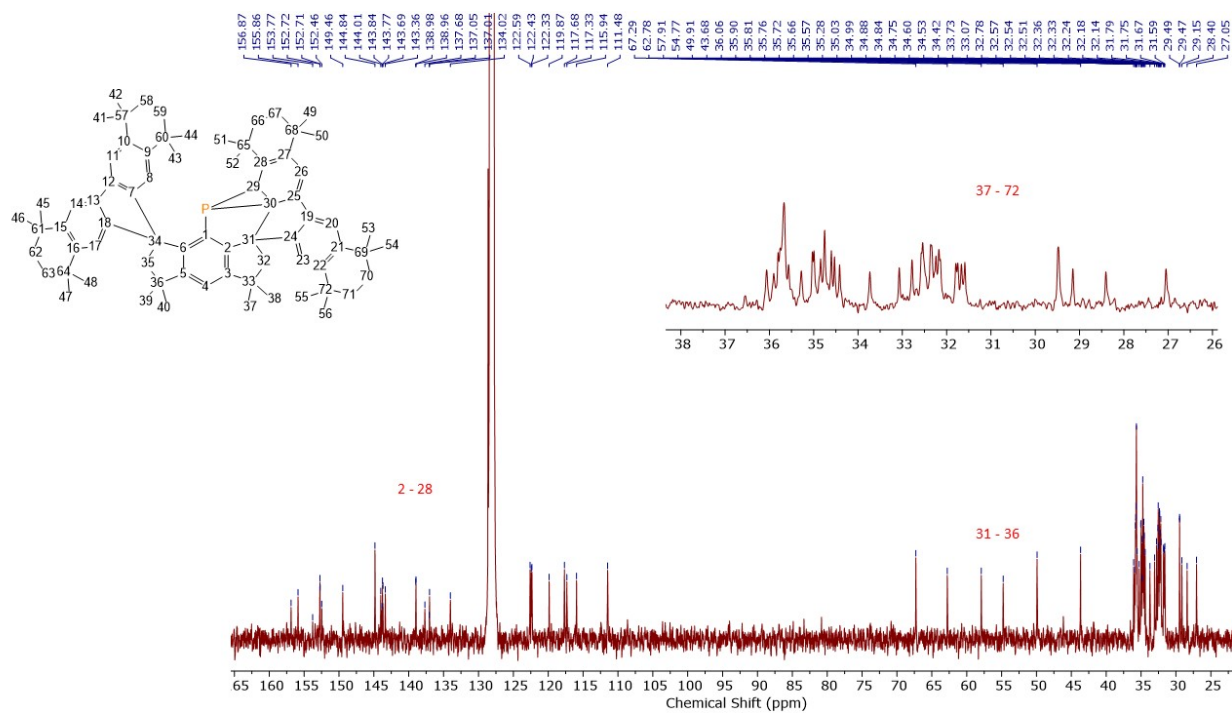

**Figure S25.**  $^{13}\text{C}\{^1\text{H}\}$  NMR spectrum ( $\text{C}_6\text{D}_6$ , 101 MHz) **7** at room temperature. Signals arising from atoms 1, 29, and 30 were not identified.

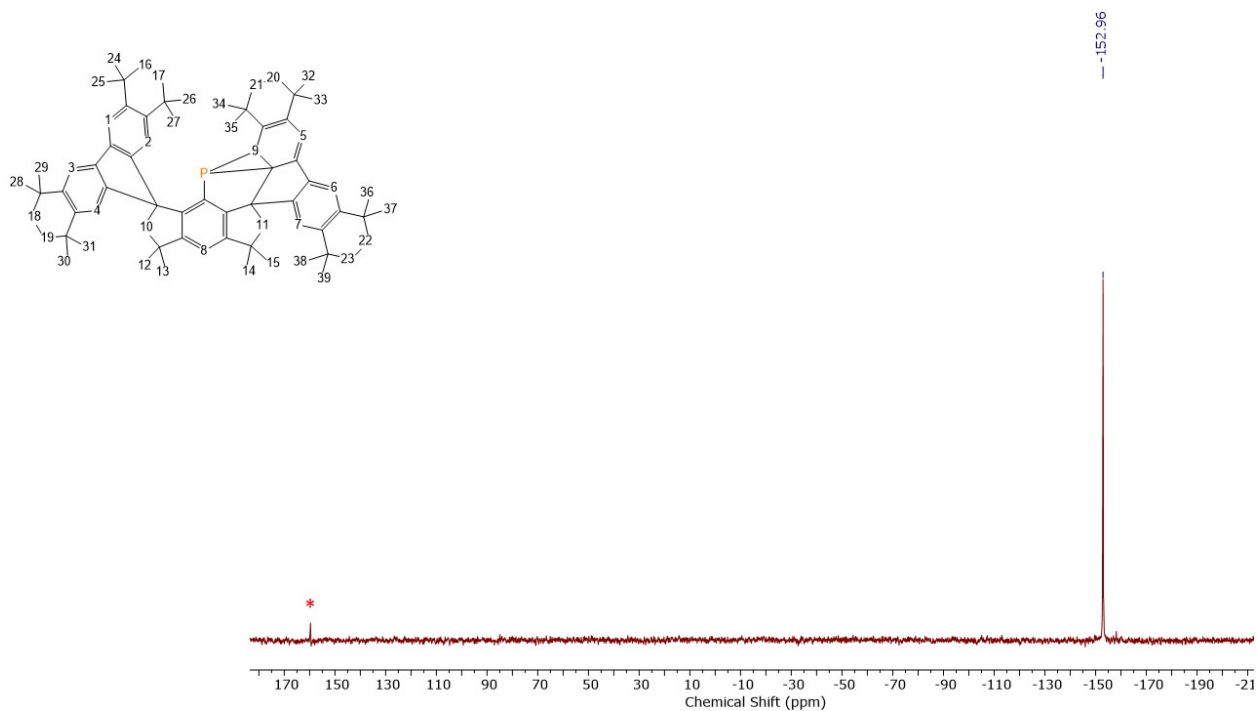

**Figure S26.**  $^{31}\text{P}\{^1\text{H}\}$  NMR spectrum ( $\text{C}_6\text{D}_6$ , 162 MHz) of **7** at room temperature. The asterisk denotes a signal arising from unreacted precursor, **1**.

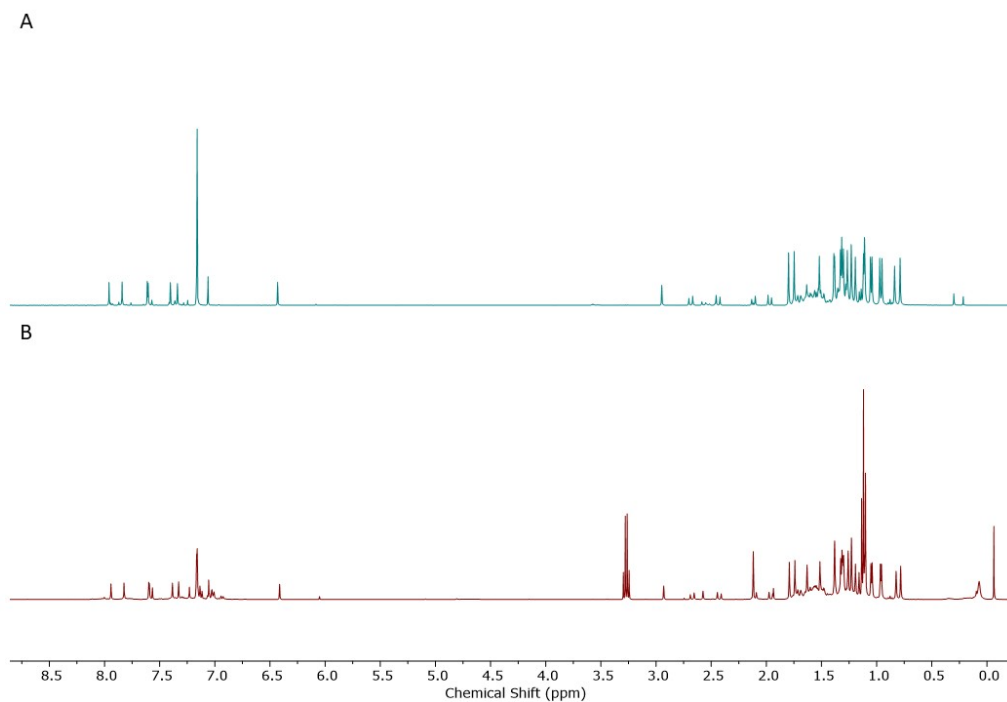

**Figure S27.**  $^1\text{H}$  NMR spectrum ( $\text{C}_6\text{D}_6$ , 400 MHz) of (A) isolated **7** and (B) **7**, generated *in situ* from a reaction mixture between  $\mathbf{3}\cdot(\text{Et}_2\text{O})_2$ , KBz, and  $\text{N}_2\text{O}$  at room temperature.

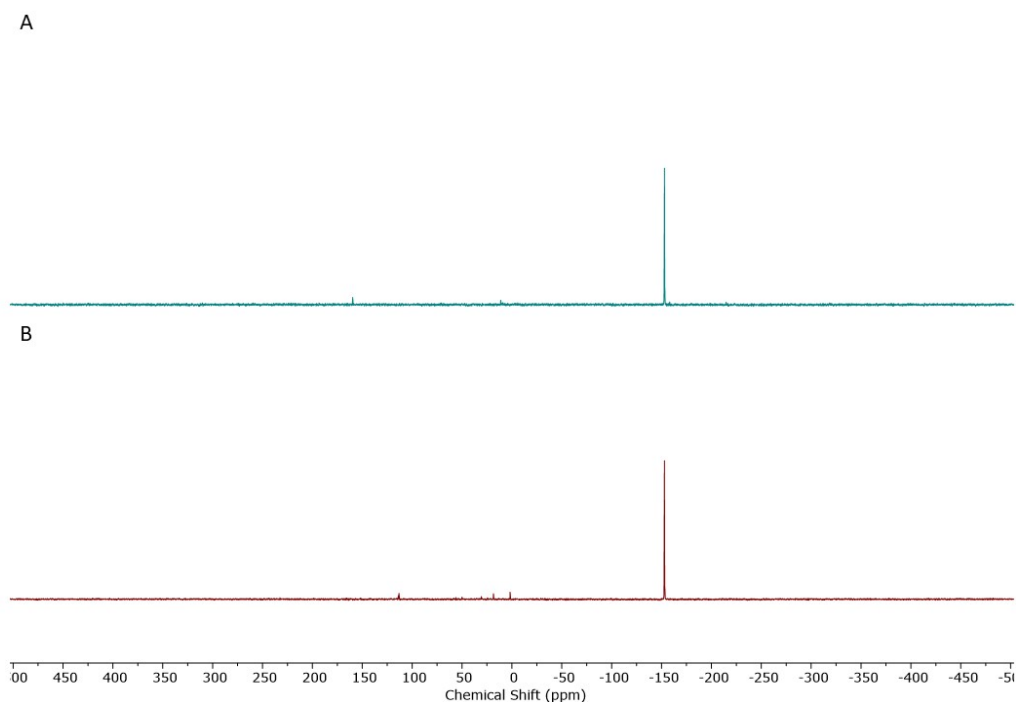

**Figure S28.**  $^{31}\text{P}\{^1\text{H}\}$  NMR spectrum ( $\text{C}_6\text{D}_6$ , 162 MHz) of (A) isolated **7** and (B) a reaction mixture between  $\mathbf{3}\cdot(\text{Et}_2\text{O})_2$ , KBz, and  $\text{N}_2\text{O}$  at room temperature.

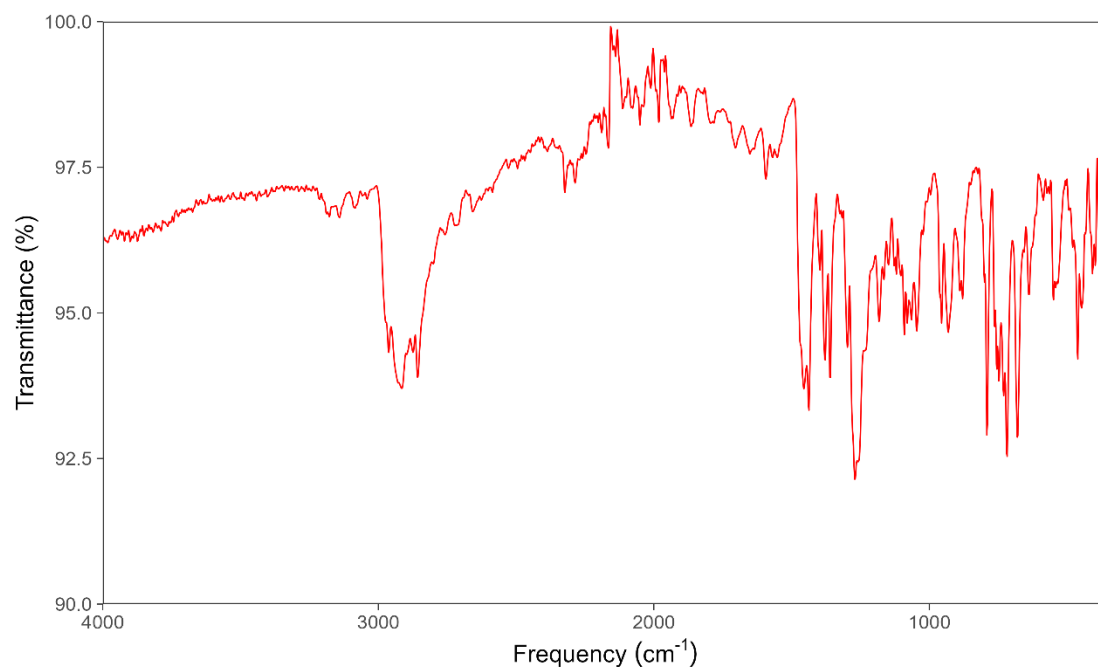

**Figure S29.** Experimental IR spectrum of **7**.

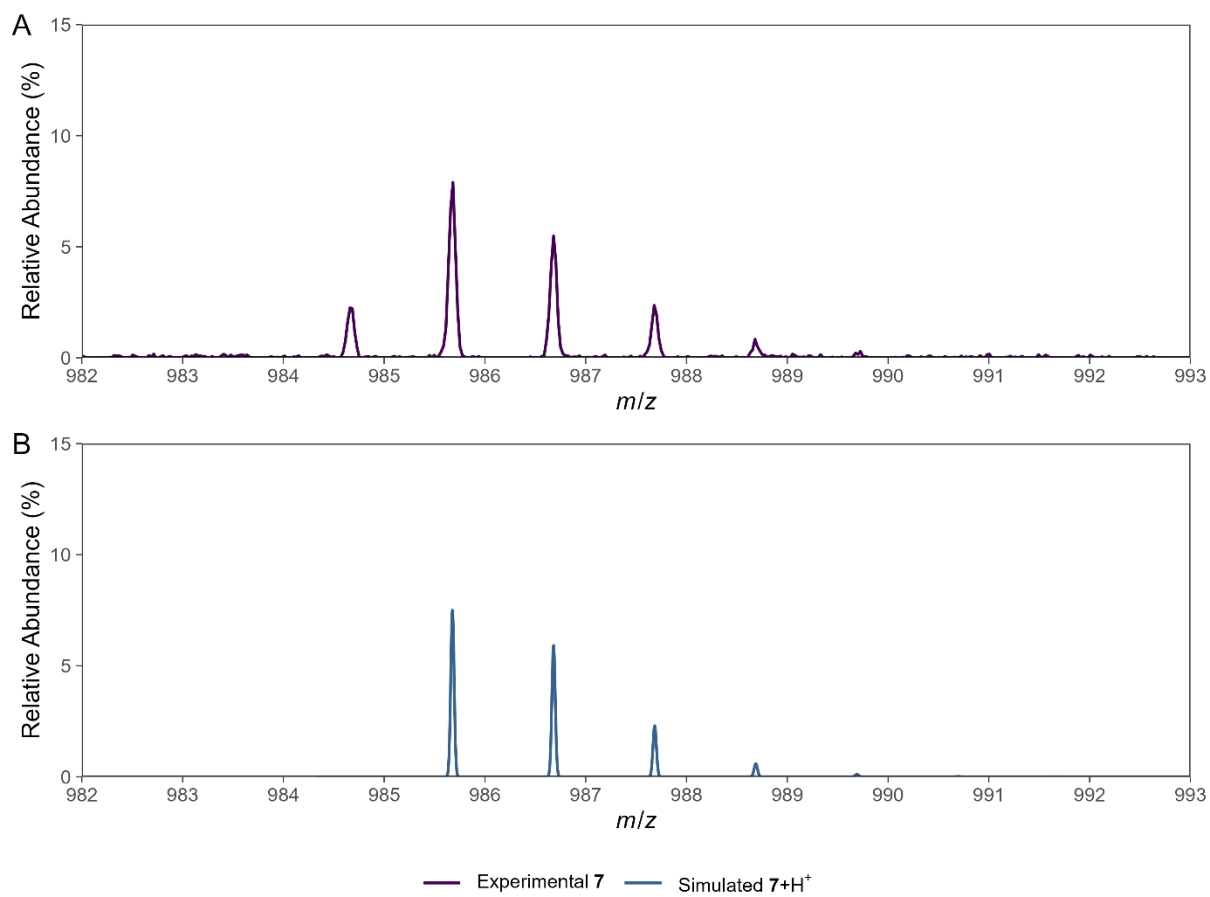

**Figure S30.** (A) Experimental HR-ESI-MS spectrum of **7**. (B) Simulated HR-ESI-MS spectrum for **7+H<sup>+</sup>**.

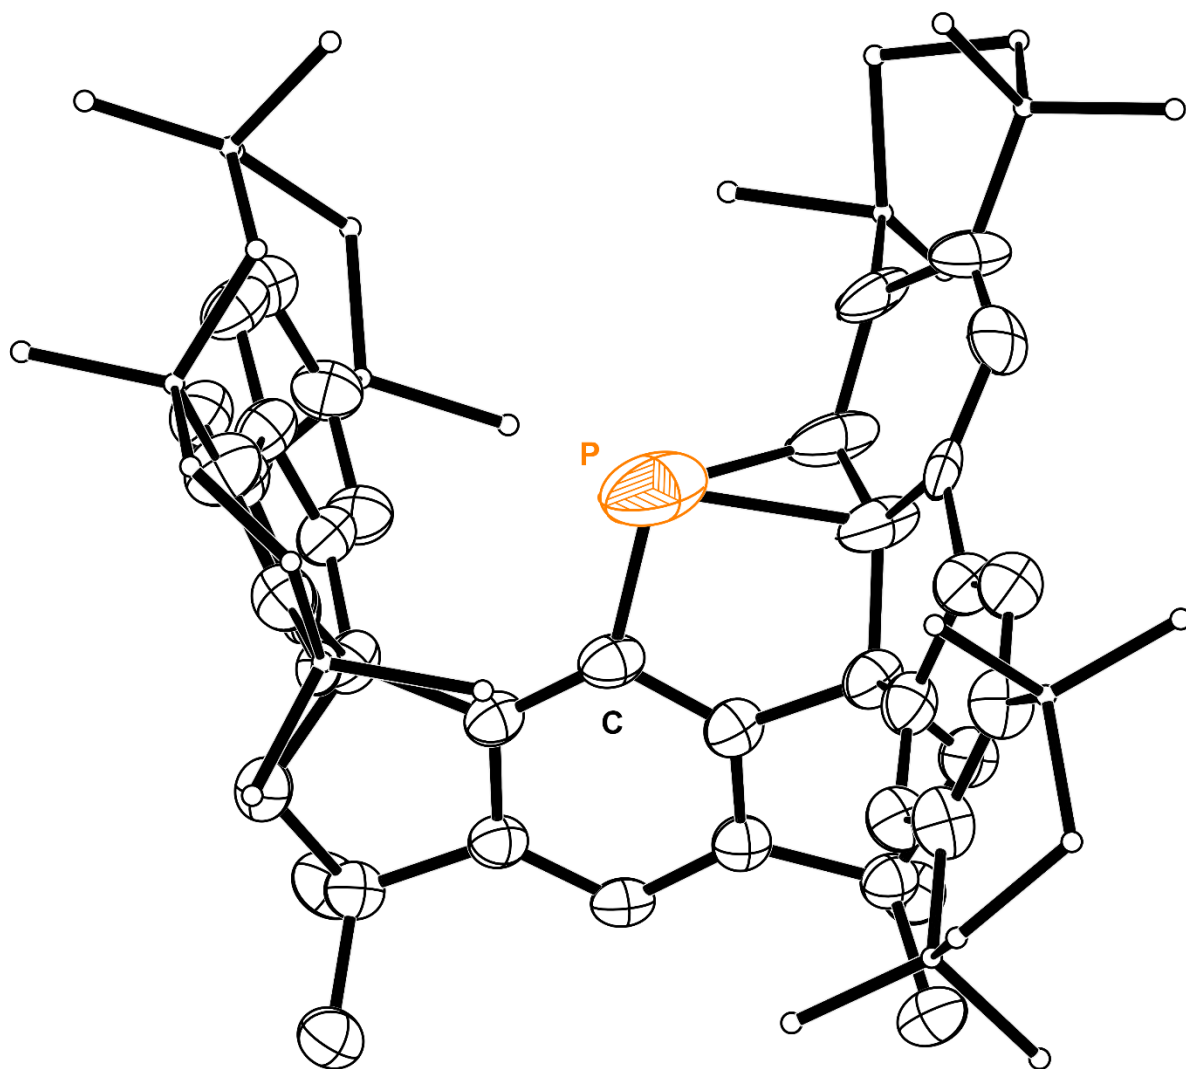

**Figure S31.** Thermal ellipsoid plot (50% probability) of **7•(toluene)<sub>0.5</sub>**. Solvent molecules, H atoms, and disordered components are omitted for clarity. Color code: P orange, C black. Select alkyl C atoms are shown as spheres of arbitrary size for clarity.

## 2.5 Synthesis of (M<sup>s</sup>FluInd\*)PCO (**8** and <sup>13</sup>**8**) *in situ*.

**Method A (Synthesis of **8**).** A solution of **7** (25 mg, 25 μmol) in C<sub>6</sub>D<sub>6</sub> (0.6 mL) was transferred to an amber-glass J-Young tube. The solution was degassed via freeze-pump-thaw before being treated with CO (1 atm) at room temperature. The sample was heated to 50 °C overnight before being analyzed by <sup>1</sup>H, <sup>13</sup>C{<sup>1</sup>H}, and <sup>31</sup>P{<sup>1</sup>H}, confirming the quantitative formation of **8** in solution. The solution of **8** was stripped of solvent and the resulting solid was analyzed by IR spectroscopy and HR-ESI-MS.

**Method B (Synthesis of <sup>13</sup>**8**).** A solution of **3**•(Et<sub>2</sub>O)<sub>2</sub> (31 mg, 26 μmol) in C<sub>6</sub>D<sub>6</sub> (1 mL) was transferred to a vial containing KBz (7.0 mg, 54 μmol) and stirred for 2 h. The reaction mixture was filtered through a glass filter pad and transferred to an amber-glass J-Young tube. The sample was degassed *via* freeze-pump-thaw three times before being treated with gaseous <sup>13</sup>CO<sub>2</sub> (1 atm) at room temperature, and the tube was inverted three times. The sample was analyzed by <sup>1</sup>H, <sup>13</sup>C{<sup>1</sup>H}, and <sup>31</sup>P NMR spectroscopy to confirm the presence of <sup>13</sup>**8**. Crystals of <sup>13</sup>**8** suitable for X-ray diffraction were grown from a concentrated mixture of hexane/toluene.

**Note:** **8** and <sup>13</sup>**8** were generated *in situ* and were not isolated as pure, bulk solids due to partial decomposition to form **7** during workup.

**<sup>1</sup>H NMR (400 MHz, C<sub>6</sub>D<sub>6</sub>):** δ = 7.79 (s, 4H), 7.35 (s, 1H), 7.23 (s, 4H), 2.57 (s, 4H), 1.72 – 1.49 (m, 38H), 1.33 (s, 12H), 1.29 (s, 12H), 1.25 (s, 12H), 1.20 (s, 12H) ppm.

**<sup>13</sup>C{<sup>1</sup>H} NMR (126 MHz, C<sub>6</sub>D<sub>6</sub>):** δ = 203.0 (d, <sup>1</sup>J<sub>PC</sub> = 113.4 Hz), 155.6, 153.4, 153.4, 152.1, 144.2, 143.7, 139.6, 121.8, 118.3, 117.3, 115.5, 115.2, 64.2, 58.1, 42.9, 35.7, 35.7, 34.9, 34.6, 32.9, 32.8, 32.6, 32.3, 32.3 ppm.

**<sup>31</sup>P NMR (**8**) (162 MHz, C<sub>6</sub>D<sub>6</sub>):** δ = –232.9 (s) ppm.

**<sup>31</sup>P NMR (<sup>13</sup>**8**) (162 MHz, C<sub>6</sub>D<sub>6</sub>):** δ = –233.1 (d, <sup>1</sup>J<sub>PC</sub> = 113.4 Hz) ppm.

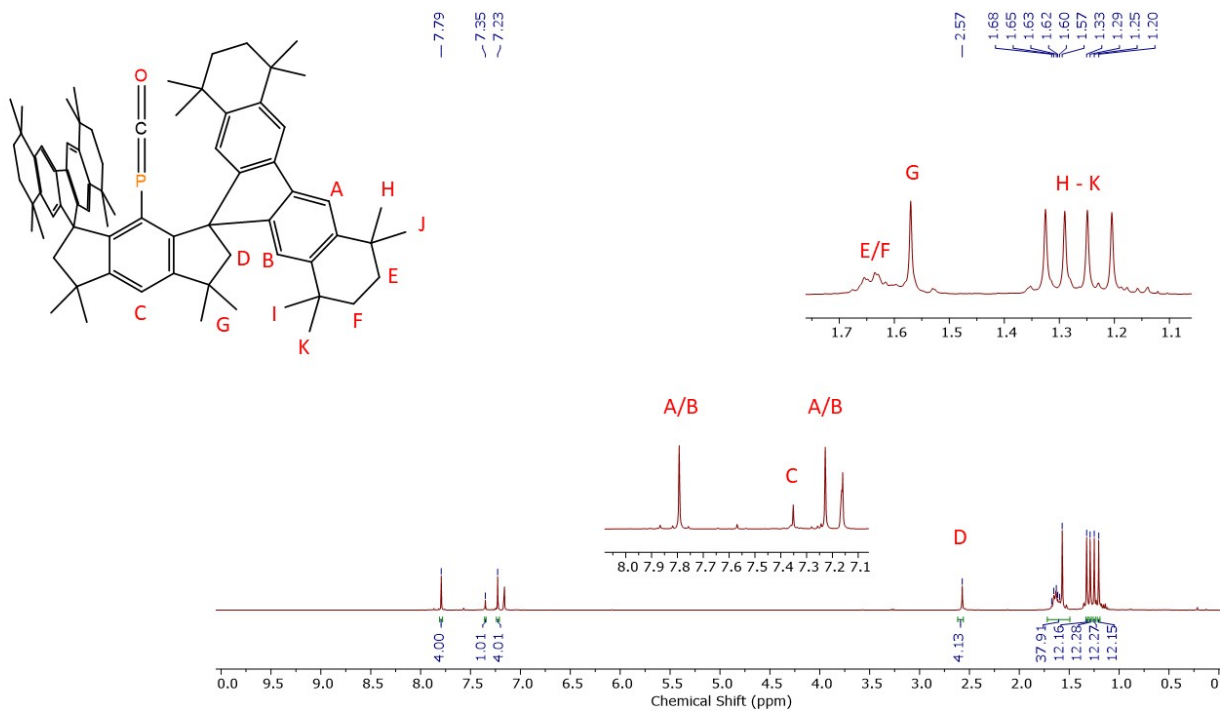

**Figure S32.**  $^1\text{H}$  NMR spectrum ( $\text{C}_6\text{D}_6$ , 400 MHz) of **8** at room temperature, generated *in situ* from a mixture of **7** and  $^{12}\text{CO}$ .

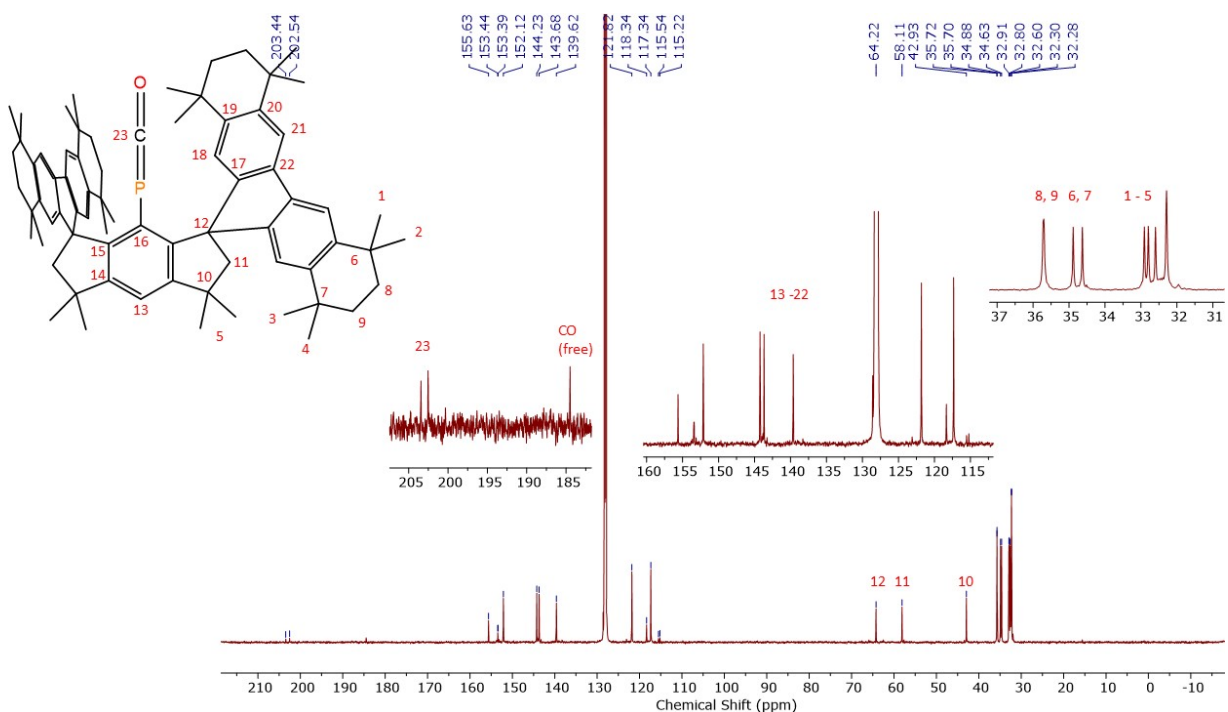

**Figure S33.**  $^{13}\text{C}\{^1\text{H}\}$  NMR spectrum ( $\text{C}_6\text{D}_6$ , 126 MHz) **8** at room temperature, generated *in situ* from a mixture of **7** and  $^{12}\text{CO}$ .

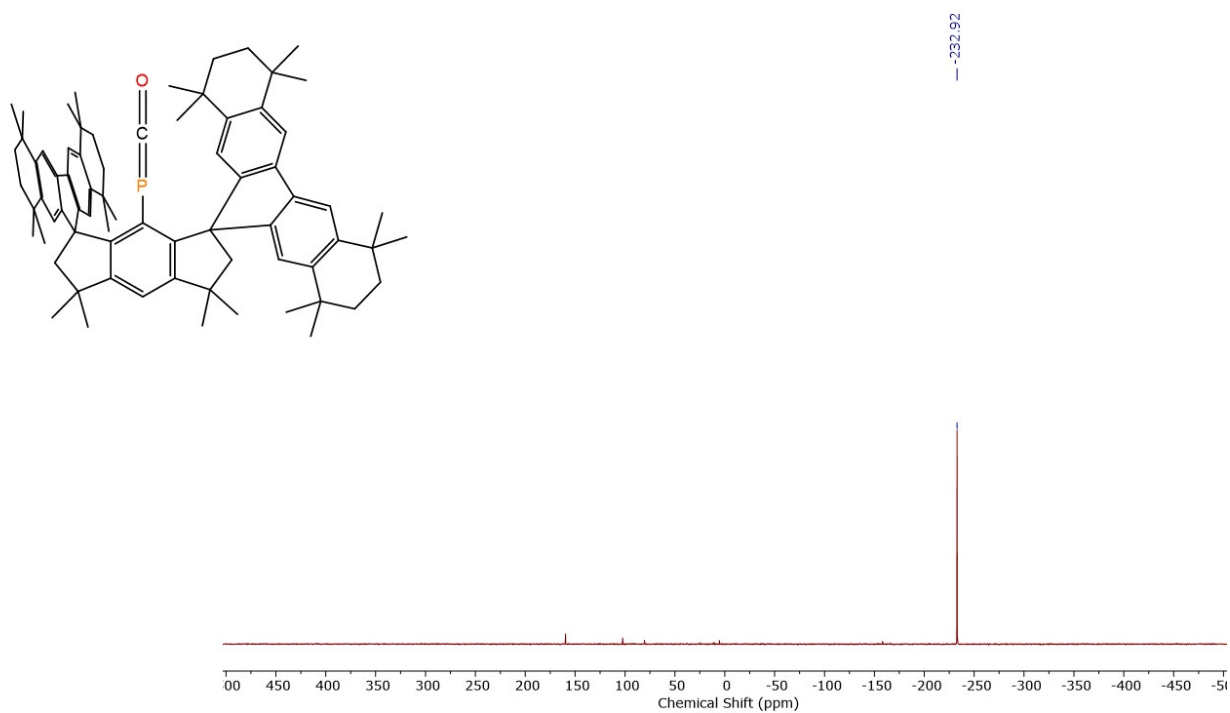

**Figure S34.**  $^{31}\text{P}\{^1\text{H}\}$  NMR spectrum ( $\text{C}_6\text{D}_6$ , 162 MHz) of **8** at room temperature, generated *in situ* from a mixture of **7** and  $^{12}\text{CO}$ .

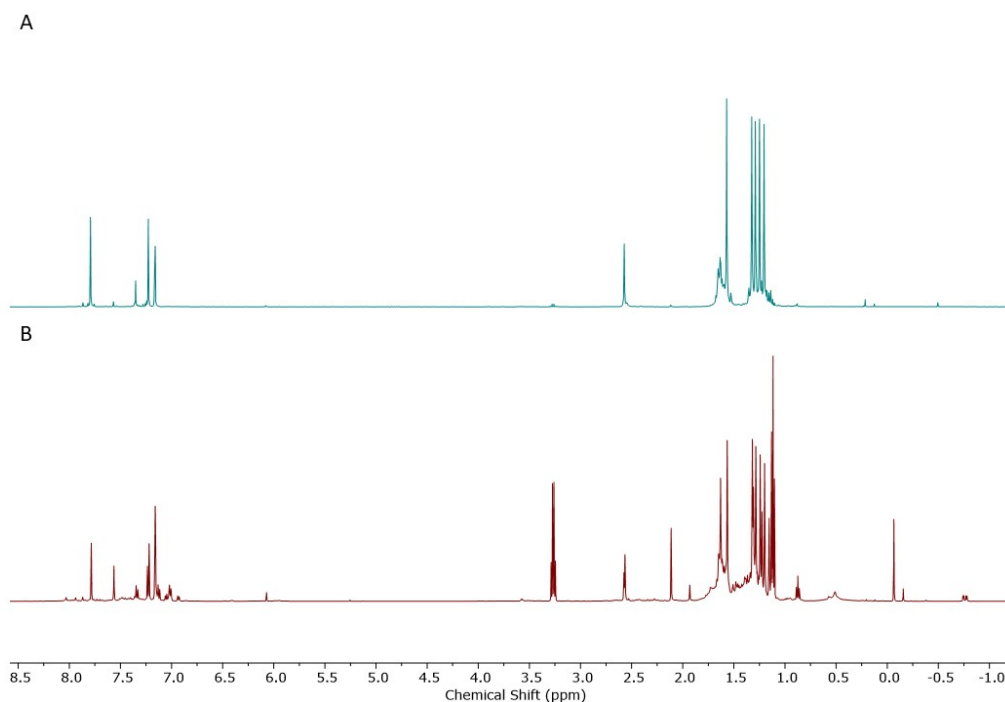

**Figure S35.** (A)  $^1\text{H}$  NMR spectrum ( $\text{C}_6\text{D}_6$ , 400 MHz) of **8**, generated *in situ* from a mixture of **7** and  $^{12}\text{CO}$ . (B)  $^1\text{H}$  NMR spectrum ( $\text{C}_6\text{D}_6$ , 500 MHz) of  $^{13}\text{8}$ , generated *in situ* from a reaction mixture between  $\mathbf{3}\cdot(\text{Et}_2\text{O})_2$ , KBz, and  $^{13}\text{CO}_2$  at room temperature.

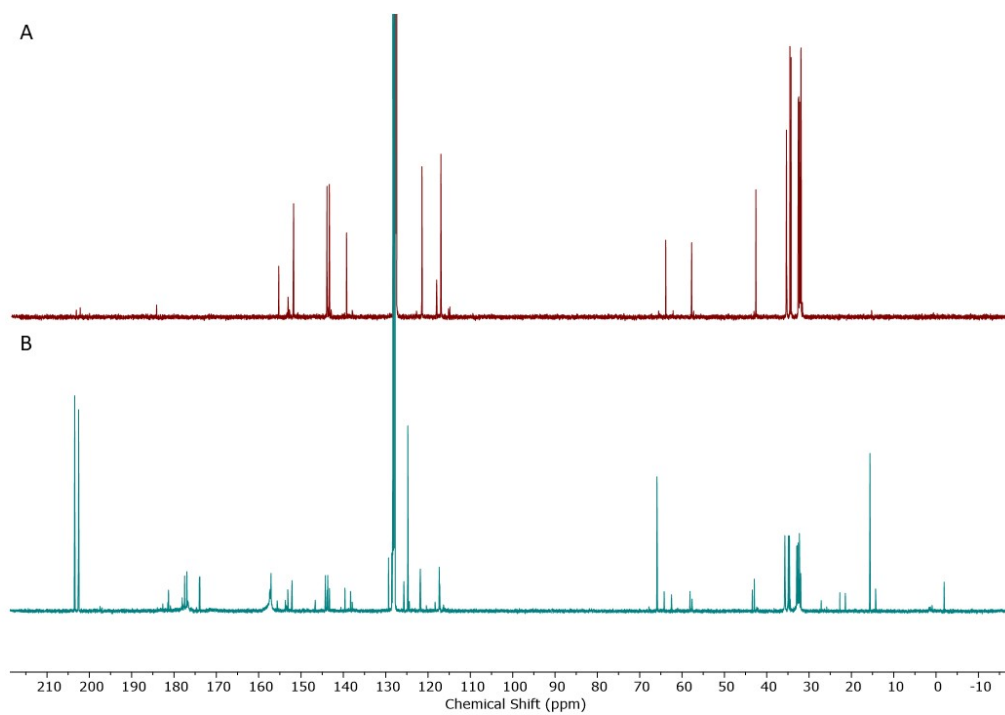

**Figure S36.**  $^{13}\text{C}\{^1\text{H}\}$  NMR spectrum ( $\text{C}_6\text{D}_6$ , 126 MHz) of (A) **8**, generated *in situ* from a mixture of **7** and  $^{12}\text{CO}$ , and (B)  $^{13}\text{8}$ , generated *in situ* from a reaction mixture between  $\mathbf{3}\cdot(\text{Et}_2\text{O})_2$ , KBz, and  $^{13}\text{CO}_2$  at room temperature.

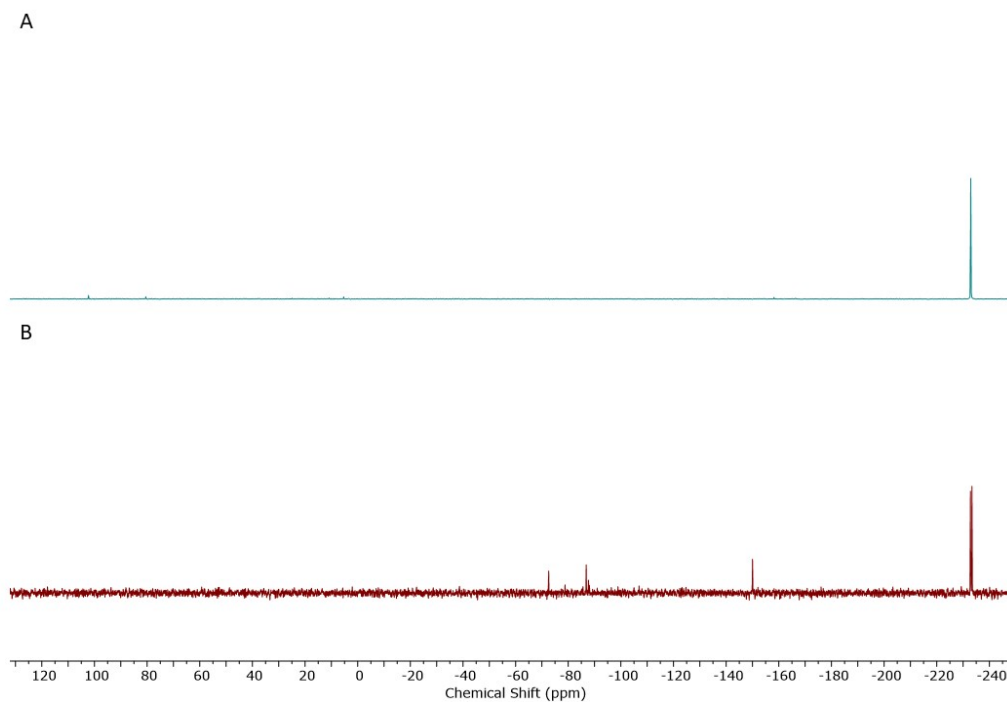

**Figure S37.** (A)  $^{31}\text{P}\{^1\text{H}\}$  NMR spectrum ( $\text{C}_6\text{D}_6$ , 162 MHz) of **8**, generated *in situ* from a mixture of **7** and  $^{12}\text{CO}$ . (B)  $^{31}\text{P}\{^1\text{H}\}$  NMR spectrum ( $\text{C}_6\text{D}_6$ , 202 MHz) of  $^{13}\text{8}$ , generated *in situ* from a reaction mixture between  $\mathbf{3}\cdot(\text{Et}_2\text{O})_2$ , KBz, and  $^{13}\text{CO}_2$  at room temperature.

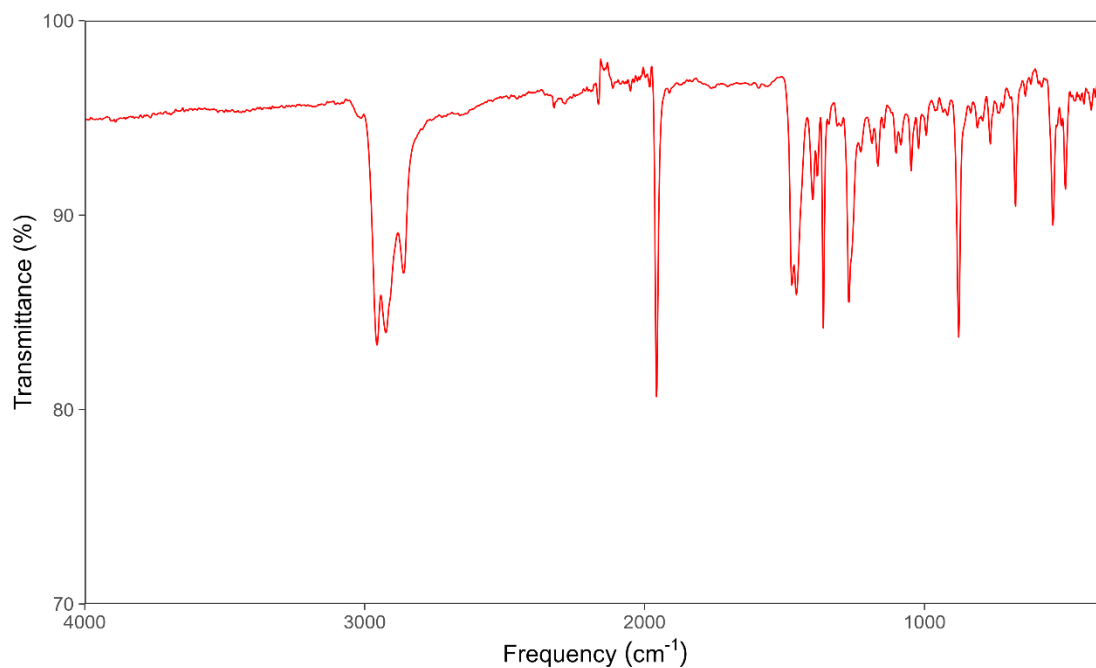

**Figure S38.** Experimental IR spectrum of **8**, generated *in situ* from a mixture of **7** and  $^{12}\text{CO}$ .

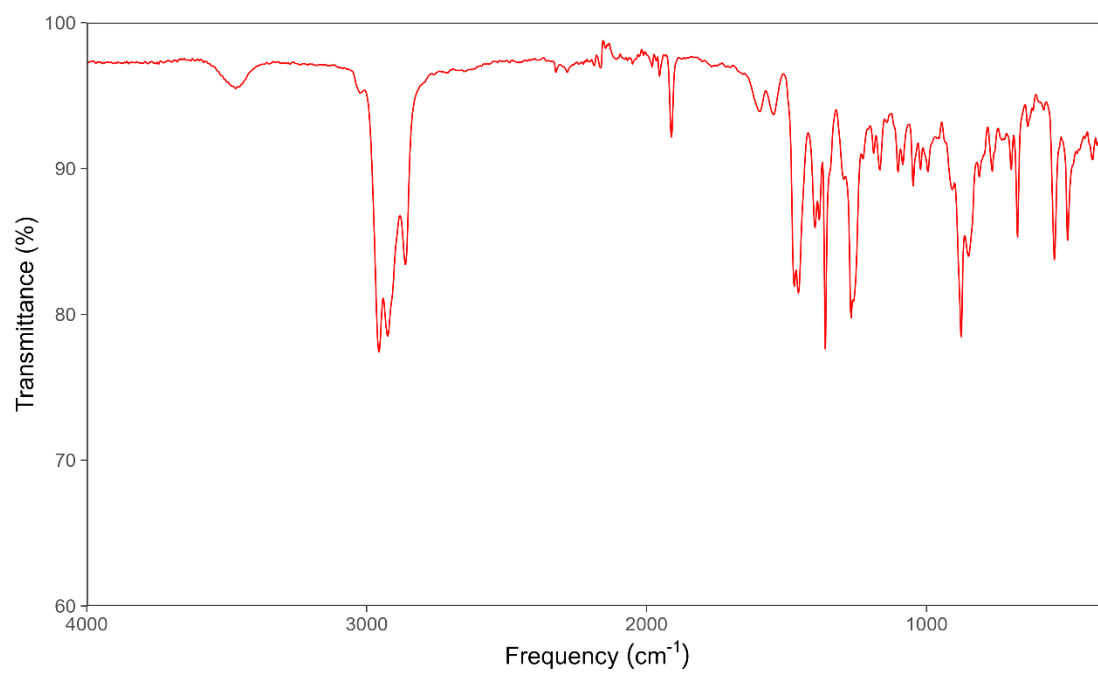

**Figure S39.** Experimental IR spectrum of **138**, generated *in situ* from a reaction mixture between **3**•(Et<sub>2</sub>O)<sub>2</sub>, KBz, and <sup>13</sup>CO<sub>2</sub>.

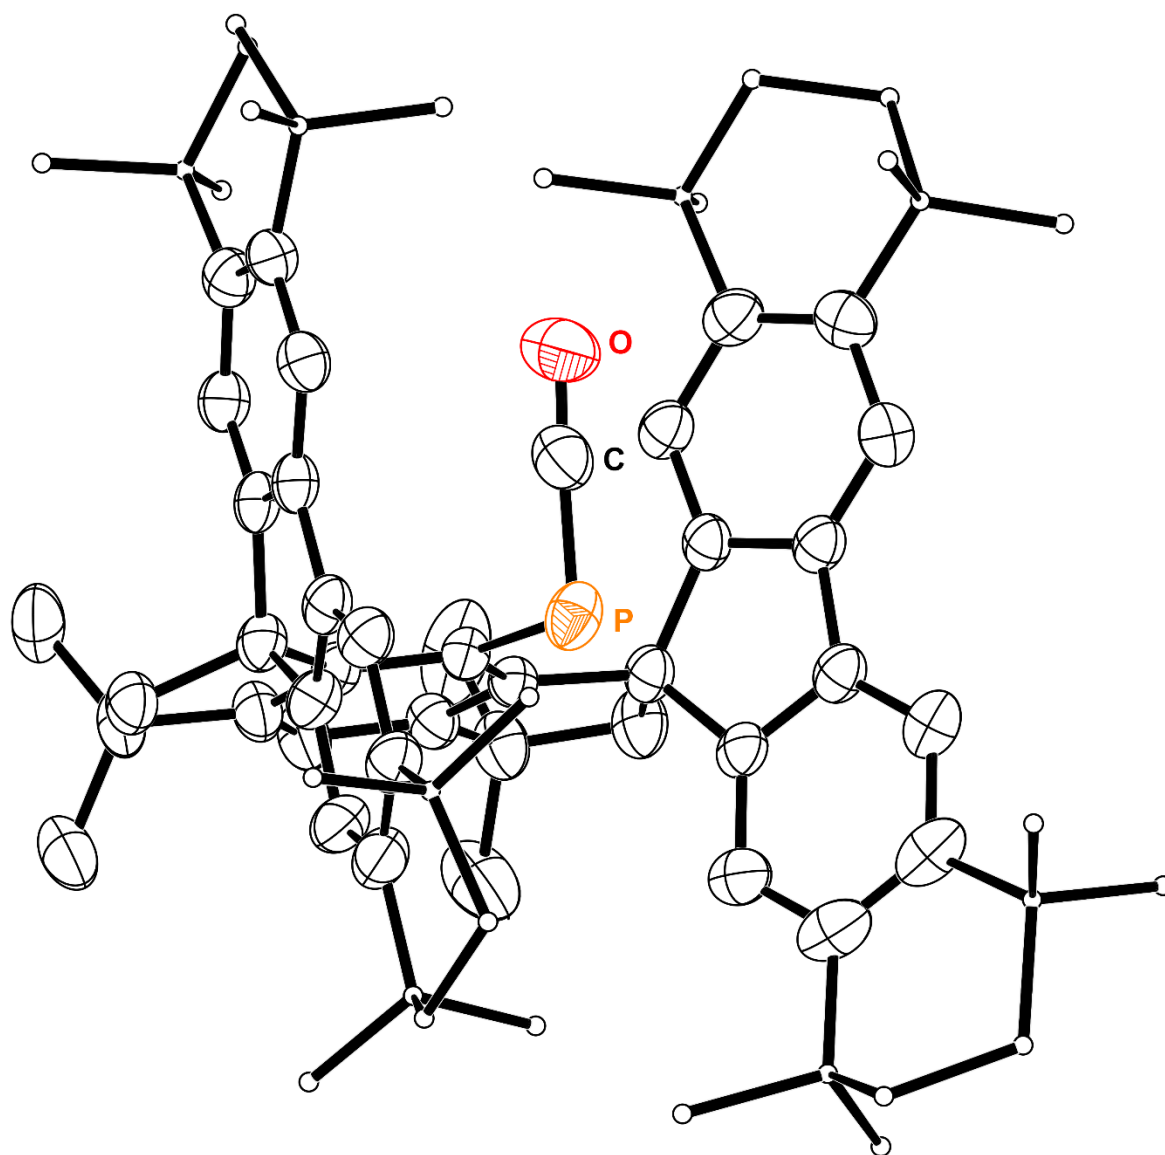

**Figure S40.** Thermal ellipsoid plot (50% probability) of **138**. Solvent molecules, H atoms, and disordered components are omitted for clarity. Color code: P orange, C black, O red.

## 2.6 Photolysis of **8**.

**Procedure.** A solution of **7** (18 mg, 18  $\mu$ mol) in  $C_6D_6$  (0.6 mL) was transferred to an amber-glass J-Young tube. The sample was analyzed by  $^1H$  and  $^{31}P\{^1H\}$  NMR (Supplementary Figure S41A, S42A). The solution was degassed *via* freeze-pump-thaw three times before being treated with CO (1 atm) at room temperature. The sample was heated to 50  $^{\circ}C$  overnight before being analyzed by  $^1H$  and  $^{31}P\{^1H\}$ , confirming the quantitative formation of **8** in solution (Supplementary Figure S41B, S42B). The sample was then transferred to a translucent J-Young tube and irradiated with light (390 nm) for 2 h before being analyzed by  $^1H$  and  $^{31}P\{^1H\}$ , confirming the near quantitative formation of **7** in solution (Supplementary Figure S41C, S42C).

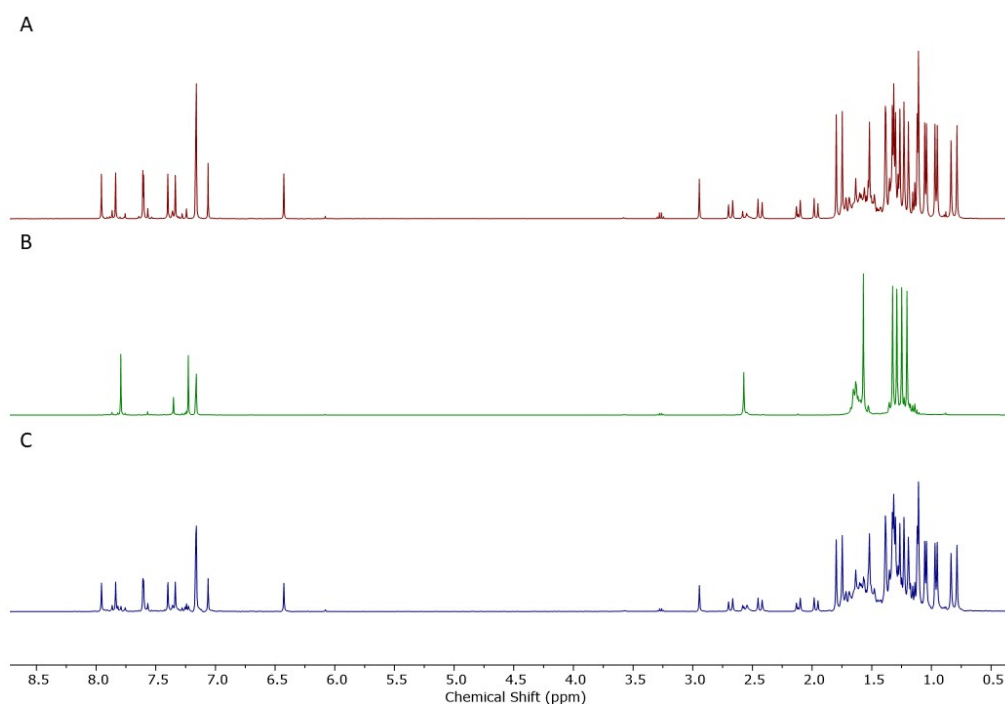

**Figure S41.**  $^1H$  NMR spectrum ( $C_6D_6$ , 400 MHz) of (A) **7**, (B) **8**, generated *in situ* from a mixture of **7** and  $^{12}CO$ , and (C) **7** generated from photolysis of **8**.

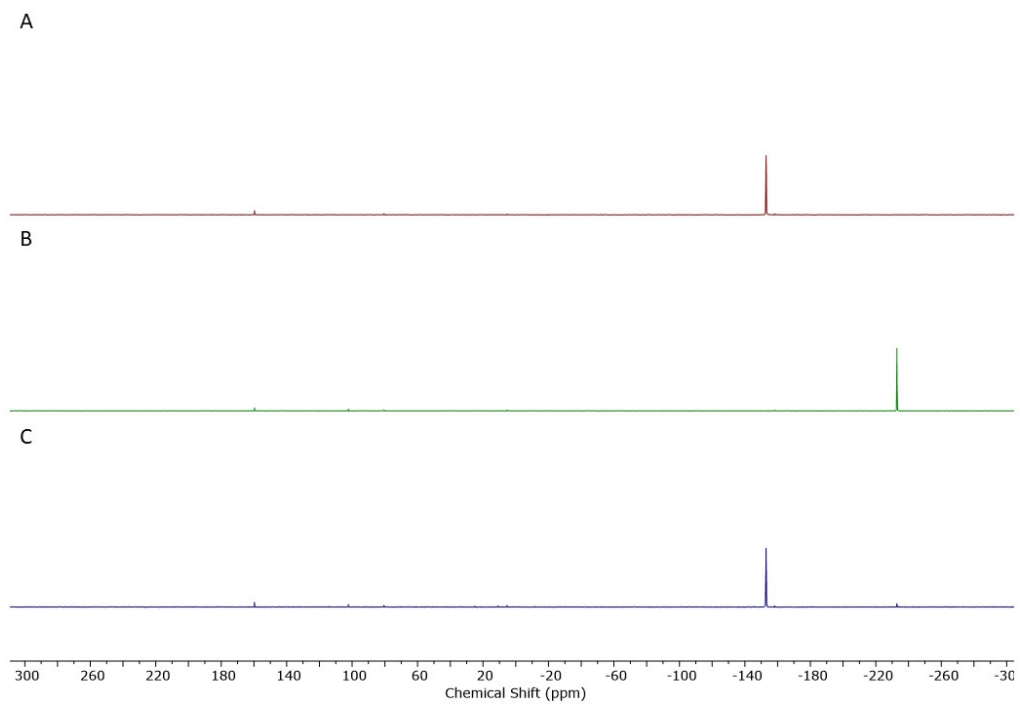

**Figure S42.**  $^{31}\text{P}\{^1\text{H}\}$  NMR spectrum ( $\text{C}_6\text{D}_6$ , 162 MHz) of (A) **7**, (B) **8**, generated *in situ* from a mixture of **7** and  $^{12}\text{CO}$ , and (C) **7** generated from photolysis of **8**.

### 3. Crystallographic Tables

**Table S1.** Crystallographic details for **4**, **5**, and <sup>13</sup>**6**.

| <b>Compound</b>                            | <b>4</b>                                                          | <b>5</b>                                                          | <sup>13</sup> <b>6</b>                                            |
|--------------------------------------------|-------------------------------------------------------------------|-------------------------------------------------------------------|-------------------------------------------------------------------|
| <b>Empirical formula</b>                   | C <sub>90</sub> H <sub>126</sub> KN <sub>2</sub> O <sub>6</sub> P | C <sub>90</sub> H <sub>126</sub> KN <sub>2</sub> O <sub>8</sub> P | C <sub>91</sub> H <sub>126</sub> KN <sub>2</sub> O <sub>8</sub> P |
| <b>Formula Weight</b>                      | 1401.99                                                           | 1433.99                                                           | 1446.00                                                           |
| <b>Temperature (K)</b>                     | 150.00(10)                                                        | 150.00(10)                                                        | 149.9(3)                                                          |
| <b>Wavelength (Å)</b>                      | 1.54184                                                           | 1.54184                                                           | 1.54184                                                           |
| <b>Crystal system</b>                      | Monoclinic                                                        | Monoclinic                                                        | Monoclinic                                                        |
| <b>Space group</b>                         | <i>C2/c</i>                                                       | <i>C2/c</i>                                                       | <i>P2<sub>1</sub>/n</i>                                           |
| <b>a (Å)</b>                               | 27.4751(6)                                                        | 27.5212(4)                                                        | 14.7892(3)                                                        |
| <b>b (Å)</b>                               | 22.2366(3)                                                        | 22.4238(3)                                                        | 21.8360(5)                                                        |
| <b>c (Å)</b>                               | 29.9474(5)                                                        | 30.0171(4)                                                        | 27.0927(5)                                                        |
| <b>α (°)</b>                               |                                                                   |                                                                   |                                                                   |
| <b>β (°)</b>                               | 117.452(2)                                                        | 117.540(2)                                                        | 94.020(2)                                                         |
| <b>γ (°)</b>                               |                                                                   |                                                                   |                                                                   |
| <b>Volume (Å<sup>3</sup>)</b>              | 16236.2(6)                                                        | 16425.4(5)                                                        | 8727.7(3)                                                         |
| <b>Z</b>                                   | 8                                                                 | 8                                                                 | 4                                                                 |
| <b>ρ<sub>calc</sub> (Mg/m<sup>3</sup>)</b> | 1.147                                                             | 1.160                                                             | 1.074                                                             |
| <b>Crystal size (mm<sup>3</sup>)</b>       | 0.188 × 0.146 ×<br>0.141                                          | 0.2 × 0.15 ×<br>0.11                                              | 0.26 × 0.19 ×<br>0.06                                             |
| <b>θ range (°)</b>                         | 3.326 to 76.310                                                   | 3.321 to 77.656                                                   | 3.616 to 76.280                                                   |
| <b>Total reflections</b>                   | 61439                                                             | 61532                                                             | 52306                                                             |
| <b>Unique reflections</b>                  | 16656                                                             | 16937                                                             | 17997                                                             |
| <b>Parameters</b>                          | 1111                                                              | 1426                                                              | 1159                                                              |
| <b>Completeness</b>                        | 99.9                                                              | 99.8                                                              | 99.9                                                              |
| <b>R<sub>int</sub></b>                     | 0.0231                                                            | 0.0292                                                            | 0.0340                                                            |
| <b>R<sub>1</sub> (I &gt; 2σ)</b>           | 0.0787                                                            | 0.0664                                                            | 0.0655                                                            |
| <b>R<sub>1</sub> (all data)</b>            | 0.0909                                                            | 0.0794                                                            | 0.0826                                                            |

|                                   |         |         |         |
|-----------------------------------|---------|---------|---------|
| <b>wR<sub>2</sub> (I &gt; 2σ)</b> | 0.2339  | 0.1915  | 0.1908  |
| <b>wR<sub>2</sub> (all data)</b>  | 0.2511  | 0.2076  | 0.2083  |
| <b>Goodness of fit, S</b>         | 1.047   | 1.035   | 1.023   |
| <b>Deposition Number (CCDC)</b>   | 2537504 | 2537507 | 2537506 |

**Table S2.** Crystallographic details for **7•(toluene)<sub>0.5</sub>** and **<sup>13</sup>8**.

| <b>Compound</b>                            | <b>7•(toluene)<sub>0.5</sub></b>    | <b><sup>13</sup>8</b>              |
|--------------------------------------------|-------------------------------------|------------------------------------|
| <b>Empirical formula</b>                   | C <sub>75.5</sub> H <sub>93</sub> P | C <sub>73</sub> H <sub>89</sub> OP |
| <b>Formula Weight</b>                      | 1031.98                             | 1013.41                            |
| <b>Temperature (K)</b>                     | 100.00(10)                          | 149.97(16)                         |
| <b>Wavelength (Å)</b>                      | 1.54184                             | 1.54184                            |
| <b>Crystal system</b>                      | Monoclinic                          | Triclinic                          |
| <b>Space group</b>                         | <i>P</i> 2 <sub>1</sub> / <i>n</i>  | <i>P</i> $\bar{1}$                 |
| <b>a (Å)</b>                               | 15.2381(2)                          | 13.7547(3)                         |
| <b>b (Å)</b>                               | 20.8779(2)                          | 15.4460(3)                         |
| <b>c (Å)</b>                               | 21.5696(3)                          | 17.9250(4)                         |
| <b>α (°)</b>                               |                                     | 102.078(2)                         |
| <b>β (°)</b>                               | 97.3510(10)                         | 91.454(2)                          |
| <b>γ (°)</b>                               |                                     | 100.540(2)                         |
| <b>Volume (Å<sup>3</sup>)</b>              | 6805.74(15)                         | 3653.09(14)                        |
| <b>Z</b>                                   | 4                                   | 2                                  |
| <b>ρ<sub>calc</sub> (Mg/m<sup>3</sup>)</b> | 1.007                               | 0.921                              |
| <b>Crystal size (mm<sup>3</sup>)</b>       | 0.14 × 0.1 × 0.07                   | 0.24 × 0.15 × 0.13                 |
| <b>θ range (°)</b>                         | 2.958 to 67.078                     | 3.983 to 67.074                    |
| <b>Total reflections</b>                   | 115761                              | 57966                              |
| <b>Unique reflections</b>                  | 12036                               | 13020                              |
| <b>Parameters</b>                          | 1016                                | 779                                |

|                                   |         |                                 |
|-----------------------------------|---------|---------------------------------|
| <b>Completeness</b>               | 99.2    | 99.7                            |
| <b>R<sub>int</sub></b>            | 0.0430  | 0.0587                          |
| <b>R<sub>1</sub> (I &gt; 2σ)</b>  | 0.0775  | 0.0847                          |
| <b>R<sub>1</sub> (all data)</b>   | 0.0965  | 0.0996                          |
| <b>wR<sub>2</sub> (I &gt; 2σ)</b> | 0.2138  | 0.2353                          |
| <b>wR<sub>2</sub> (all data)</b>  | 0.2275  | 0.255 <del>1</del> <sub>2</sub> |
| <b>Goodness of fit, S</b>         | 1.018   | 1.021                           |
| <b>Deposition Number (CCDC)</b>   | 2537503 | 2537505                         |

---

## 4. Computational Data

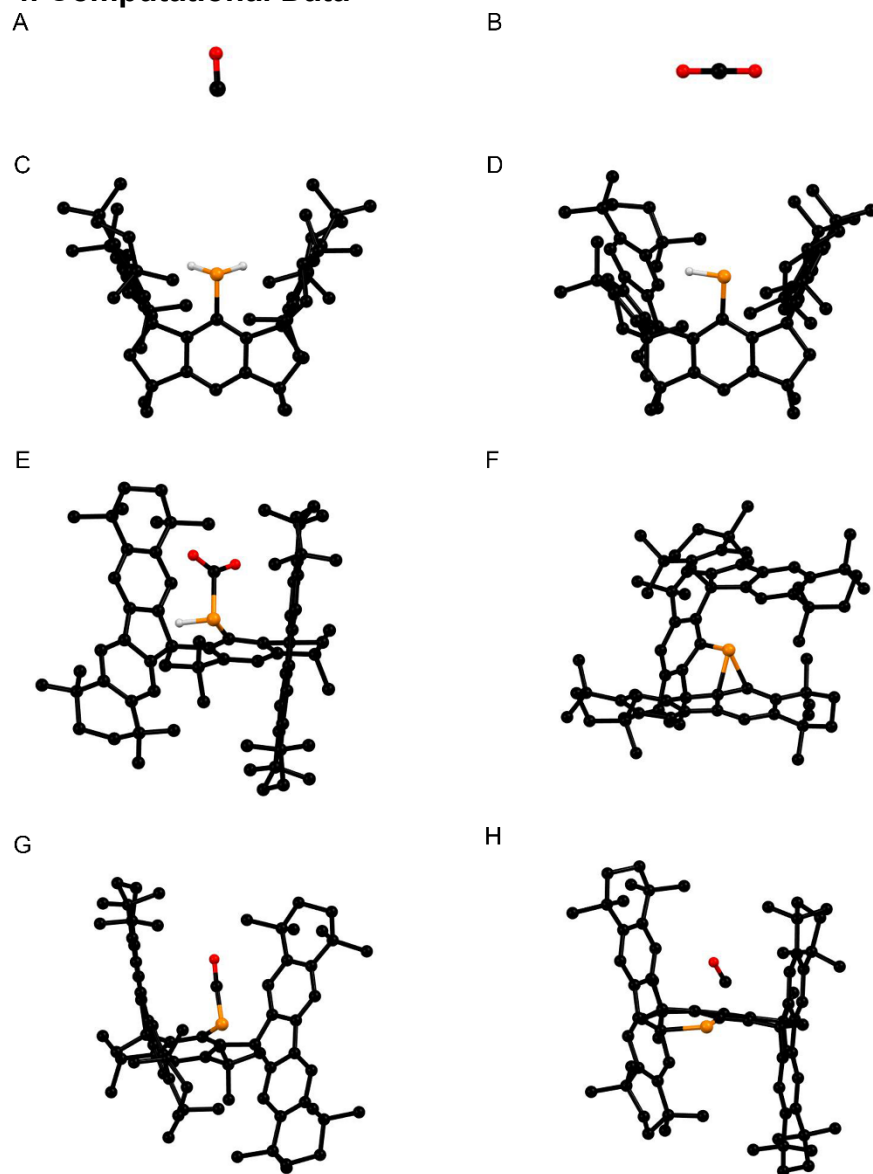

**Figure S43.** Ball-and-stick representation of geometry-optimized atomic coordinates (r<sup>2</sup>SCAN-3c) of (A) CO, (B) CO<sub>2</sub>, (C) **2**, (D) **4**-K(2.2.2.crypt)<sup>-</sup>, (E) **6**-K(2.2.2.crypt)<sup>-</sup>, (F) **7**, (G) **8**, and (H) **TS**. C-bound H atoms are omitted for clarity. Color code: P orange, O red, C black, H grey.

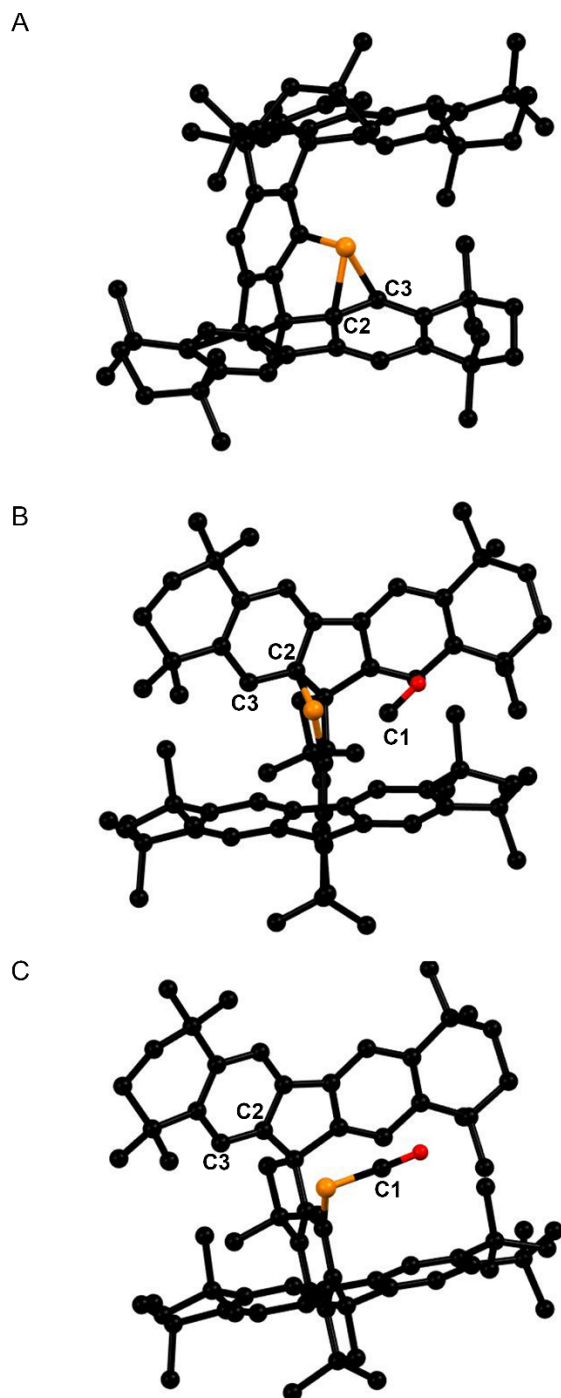

**Figure S44.** Ball-and-stick representation of geometry-optimized atomic coordinates (r<sup>2</sup>SCAN-3c) of (A) **7**, (B) **TS**, and (C) **8**, in which C atoms referred to throughout as C1, C2 and C3 are labelled in each case. C-bound H atoms are omitted for clarity. Color code: P orange, O red, C black.

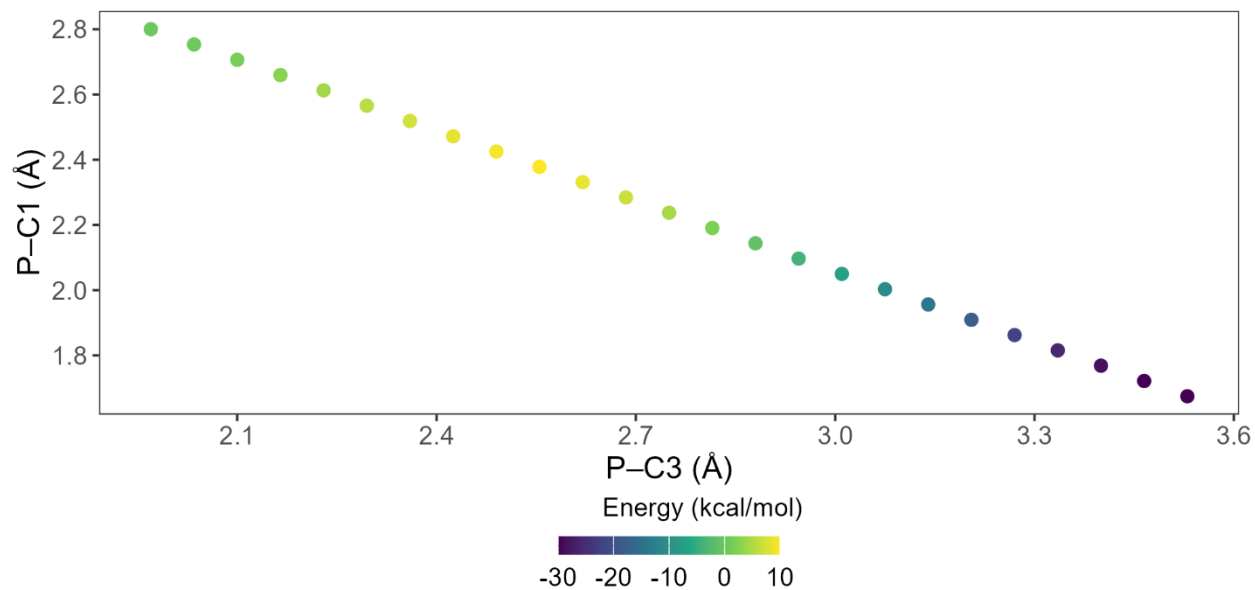

**Figure S45.** Simultaneous, two-dimensional relaxed surface scan ( $r^2$ SCAN-3c) along the proposed reaction coordinate for the conversion of **7**+CO to **8**, in which the P–C1 (where C1 is the carbonyl carbon) is extended from 1.675 Å to 2.8 Å, while the P–C3 distance (where C3 is the secondary fluorenyl carbon that binds P in **7**, as displayed in Figure 4) is contracted from 3.53 Å to 1.97 Å.

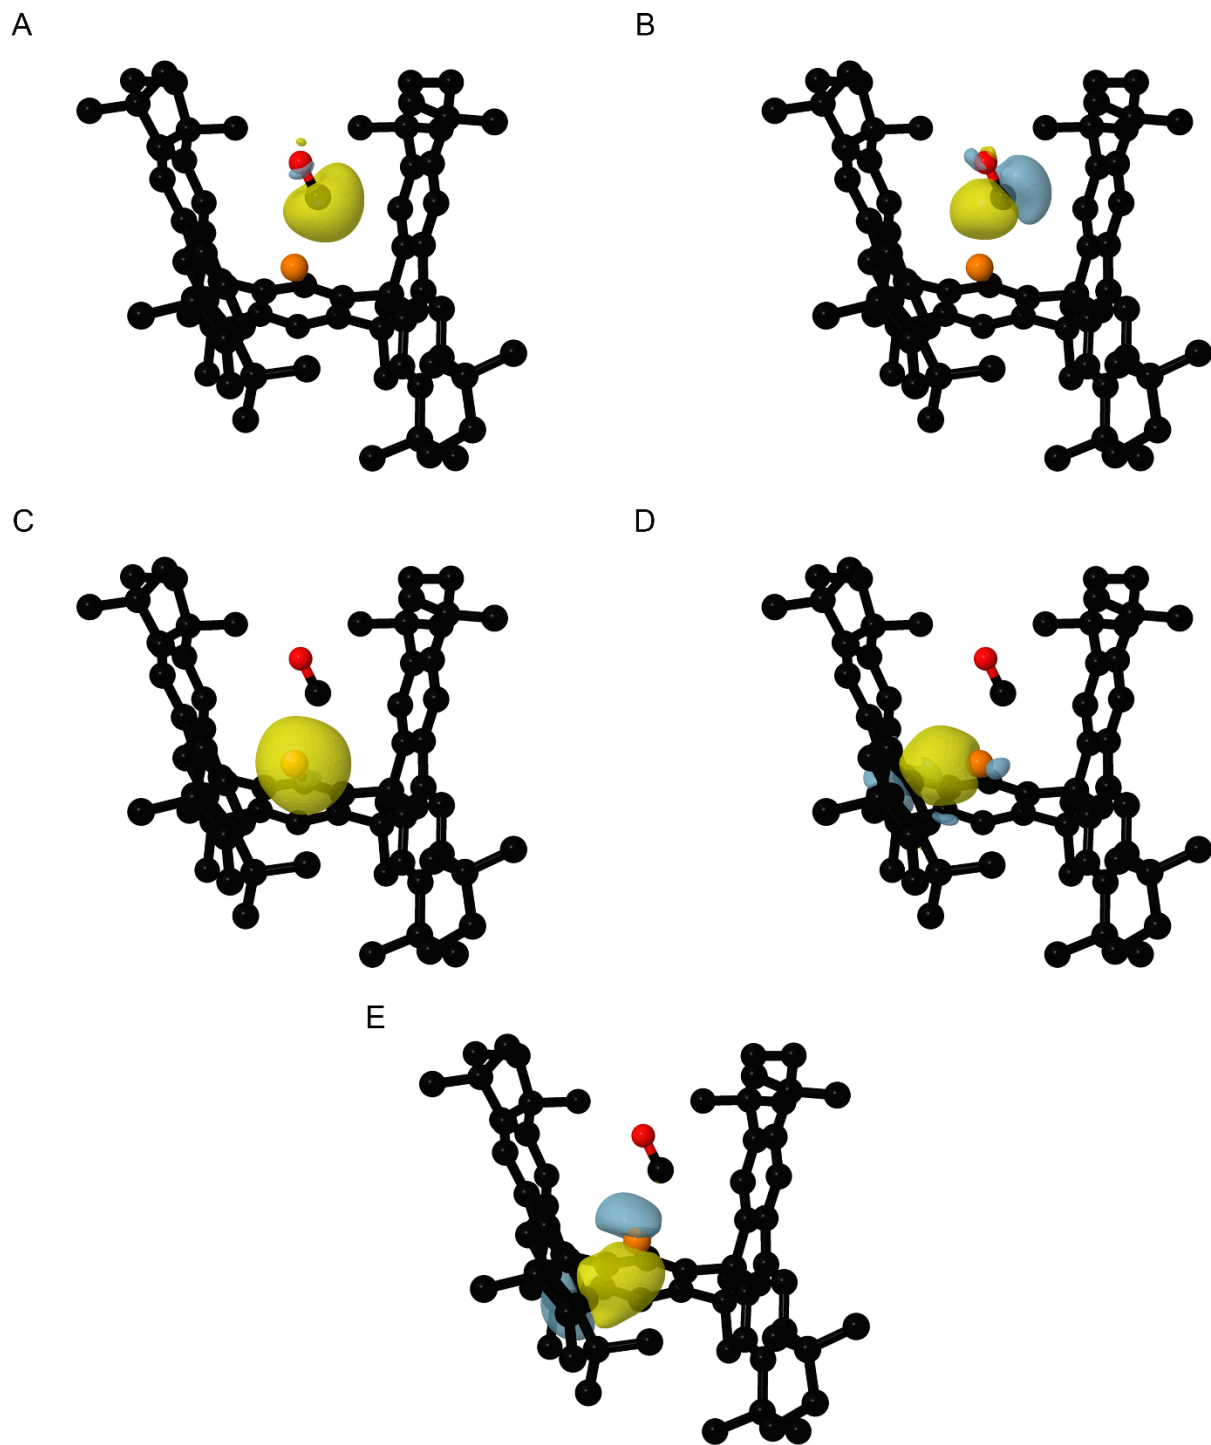

**Figure S46.** Surface plots (PBE0-D3BJ/def2-TZVP// $r^2$ SCAN-3c) (isovalue = 0.06) depicting select NBOs identified in **TS**. (A) The C1-centered lone pair, (B) the C1-centered lone valence (or empty  $p$ -orbital), (C) the P-centered lone pair, (D) the P–C2 bonding orbital, and (E) the P–C3 bonding orbital. H atoms are omitted for clarity. Color code: P orange, O red, C black.

**Table S3.** Enthalpy of formation.<sup>a</sup>

| Compound                      | $\Delta H_f$ (Eh) | $\Delta H_f$ (kcal/mol) |
|-------------------------------|-------------------|-------------------------|
| 4-K(2.2.2.crypt) <sup>-</sup> | -3137.18189576    | -1968591.051            |
| 6-K(2.2.2.crypt) <sup>-</sup> | -3325.76499639    | -2086927.513            |
| 2                             | -3137.73347661    | -1968937.17             |
| 7                             | -3136.51686703    | -1968173.744            |
| 8                             | -3249.85296908    | -2039292.488            |
| TS                            | -3249.792869      | -2039254.775            |
| CO                            | -113.28531632     | -71086.87585            |
| CO <sub>2</sub>               | -188.5560041      | -118319.4582            |

<sup>a</sup> Calculated at the r<sup>2</sup>SCAN-3c level of theory.**Table S4.** Gibbs Free Energy of formation.<sup>a</sup>

| Compound                      | $\Delta G$ (Eh) | $\Delta G$ (kcal/mol) |
|-------------------------------|-----------------|-----------------------|
| 4-K(2.2.2.crypt) <sup>-</sup> | -3137.341412    | -1968691.148          |
| 6-K(2.2.2.crypt) <sup>-</sup> | -3325.9297715   | -2087030.909          |
| 2                             | -3137.893826    | -1969037.789          |
| 7                             | -3136.674194    | -1968272.467          |
| 8                             | -3250.015843    | -2039394.691          |
| TS                            | -3249.955755    | -2039356.986          |
| CO                            | -113.3077484    | -71100.95207          |
| CO <sub>2</sub>               | -188.5749724    | -118331.3609          |

<sup>a</sup> Calculated at the r<sup>2</sup>SCAN-3c level of theory.**Table S5.** Select bond lengths (Å).<sup>a</sup>

| Bond | 7     | TS    | 8     |
|------|-------|-------|-------|
| P-C1 | NA    | 2.226 | 1.675 |
| P-C2 | 1.976 | 2.119 | 3.189 |
| P-C3 | 1.970 | 2.331 | 3.530 |

<sup>a</sup> From theoretical coordinates (r<sup>2</sup>SCAN-3c).

**Table S6.** Energies obtained for a simultaneous, two-dimensional relaxed surface scan along the proposed reaction coordinate for the conversion of **7**+CO to **8**, starting from the coordinates of **8**, in which the P–C1 (where C1 is the carbonyl carbon) is extended from 1.675 Å to 2.8 Å, while the P–C3 distance (where C3 is the secondary fluorenyl carbon that binds P in **7**, as displayed in Figure 4) is contracted from 3.53 Å to 1.97 Å.<sup>a</sup>

| P–C3<br>(Å)       | P–C1<br>(Å)        | Energy<br>(Eh) | Relative Energy<br>(Eh) | Relative Energy<br>(kcal/mol) |
|-------------------|--------------------|----------------|-------------------------|-------------------------------|
| 3.53              | 1.675              | -3251.35483968 | -0.05021200             | -31.5082                      |
| 3.465             | 1.721875           | -3251.35364744 | -0.04901976             | -30.76                        |
| 3.4               | 1.76875            | -3251.35045820 | -0.04583052             | -28.7588                      |
| 3.335             | 1.815625           | -3251.34576595 | -0.04113827             | -25.8144                      |
| 3.27              | 1.8625             | -3251.33997081 | -0.03534313             | -22.1779                      |
| 3.205             | 1.909375           | -3251.33344181 | -0.02881413             | -18.081                       |
| 3.14              | 1.95625            | -3251.32750747 | -0.02287979             | -14.3571                      |
| 3.075             | 2.003125           | -3251.32177831 | -0.01715063             | -10.7621                      |
| 3.01              | 2.05               | -3251.31625662 | -0.01162894             | -7.29719                      |
| 2.945             | 2.096875           | -3251.31100120 | -0.00637352             | -3.9994                       |
| 2.88              | 2.14375            | -3251.30607557 | -0.00144789             | -0.90856                      |
| 2.815             | 2.190625           | -3251.30154539 | 0.00308229              | 1.934146                      |
| 2.75              | 2.2375             | -3251.29747716 | 0.00715052              | 4.486973                      |
| 2.685             | 2.284375           | -3251.29392523 | 0.01070245              | 6.715819                      |
| 2.62              | 2.33125            | -3251.29096398 | 0.01366370              | 8.574013                      |
| 2.555             | 2.378125           | -3251.28880919 | 0.01581849              | 9.92615                       |
| 2.49 <sup>b</sup> | 2.425 <sup>b</sup> | -3251.28965930 | 0.01496838              | 9.392703                      |
| 2.425             | 2.471875           | -3251.29120938 | 0.01341830              | 8.420024                      |
| 2.36              | 2.51875            | -3251.29334626 | 0.01128142              | 7.079125                      |
| 2.295             | 2.565625           | -3251.29568925 | 0.00893843              | 5.608892                      |
| 2.23              | 2.6125             | -3251.29809073 | 0.00653695              | 4.101956                      |
| 2.165             | 2.659375           | -3251.30039242 | 0.00423526              | 2.657638                      |
| 2.1               | 2.70625            | -3251.30241504 | 0.00221264              | 1.388438                      |
| 2.035             | 2.753125           | -3251.30393426 | 0.00069342              | 0.435123                      |
| 1.97              | 2.8                | -3251.30462768 | 0.00000000              | 0                             |

<sup>a</sup> Calculated at the r<sup>2</sup>SCAN-3c level of theory. <sup>b</sup> Optimized structure used for input for transition state search that identified the transition state, **TS**.

**Table S7.** NBO analysis of **TS**.<sup>a</sup>

| NBO                | Population | %<br>atom<br>1 | %<br>atom<br>2 | %s<br>character<br>1 | %p<br>character<br>1 | %s<br>character<br>2 | %p<br>character<br>2 |
|--------------------|------------|----------------|----------------|----------------------|----------------------|----------------------|----------------------|
| P-C2<br>$\sigma$   | 1.714      | 43.98          | 56.02          | 9.31                 | 90.32                | 7.18                 | 92.67                |
| P-C3<br>$\sigma$   | 1.577      | 47.14          | 52.86          | 0.80                 | 98.77                | 2.42                 | 97.47                |
| LP P               | 1.909      | N/A            | N/A            | 74.76                | 25.21                | N/A                  | N/A                  |
| LP C1              | 1.777      | N/A            | N/A            | 76.76                | 23.20                | N/A                  | N/A                  |
| LV C1              | 0.647      | N/A            | N/A            | 0.62                 | 99.26                | N/A                  | N/A                  |
| P-C2<br>$\sigma^*$ | 0.240      | 56.02          | 43.98          | 9.31                 | 90.32                | 7.18                 | 92.67                |
| P-C3<br>$\sigma^*$ | 0.447      | 52.86          | 47.14          | 0.80                 | 98.77                | 2.42                 | 97.47                |

<sup>a</sup> Calculated at the PBE0-D3BJ/def2-TZVP//r<sup>2</sup>SCAN-3c level of theory.**Table S8.** Thermochemistry of select reactions.<sup>a</sup>

$$\begin{array}{c}
 \text{PH}_2 \\
 | \\
 \text{M}^{\text{s}}\text{FluInd}^* \xleftarrow[\text{(ii)}]{\text{H}^+} \text{M}^{\text{s}}\text{FluInd}^* \xrightarrow[\text{(i)}]{\text{CO}_2} \text{PH}(\text{CO}_2)^{\ominus} \\
 | \\
 \text{M}^{\text{s}}\text{FluInd}^*
 \end{array}$$
  

$$\begin{array}{c}
 \text{P} \\
 | \\
 \text{M}^{\text{s}}\text{FluInd}^* \xrightarrow[\text{(iii)}]{\text{CO}} \text{PCO} \\
 | \\
 \text{M}^{\text{s}}\text{FluInd}^*
 \end{array}$$

| Reaction | $\Delta H$<br>(kcal/mol) | $\Delta G$ (kcal/mol) |
|----------|--------------------------|-----------------------|
| i        | -17.00                   | -8.40                 |
| ii       | -346.12                  | -346.64               |
| iii      | -31.85                   | -21.27                |

<sup>a</sup> Calculated at the r<sup>2</sup>SCAN-3c level of theory.**Table S9.** Optimized coordinates of CO (r<sup>2</sup>-SCAN-3c).

|   |          |          |          |
|---|----------|----------|----------|
| O | 3.187288 | 5.739877 | 12.04109 |
| C | 2.341459 | 6.381006 | 12.43022 |

**Table S10.** Optimized coordinates of CO<sub>2</sub> (r<sup>2</sup>-SCAN-3c).

|   |          |          |          |
|---|----------|----------|----------|
| O | 5.959308 | 14.56434 | 17.5015  |
| O | 6.329426 | 16.56327 | 18.63348 |
| C | 6.14442  | 15.56387 | 18.06737 |

**Table S11.** Optimized coordinates of **2** (r<sup>2</sup>-SCAN-3c).

|   |          |          |          |
|---|----------|----------|----------|
| P | 5.470456 | 16.92317 | 14.1386  |
| C | 4.304873 | 16.42945 | 12.79402 |
| C | 4.208329 | 17.15427 | 11.59056 |
| C | 4.931994 | 18.44251 | 11.20556 |
| C | 4.305259 | 18.79931 | 9.810438 |
| H | 3.654116 | 19.6702  | 9.934533 |
| H | 5.087648 | 19.07857 | 9.098023 |
| C | 3.471788 | 17.58969 | 9.315584 |
| C | 3.423995 | 16.68996 | 10.53166 |
| C | 2.721317 | 15.4953  | 10.62412 |
| H | 2.124194 | 15.13372 | 9.788933 |
| C | 2.812797 | 14.76667 | 11.80187 |
| C | 2.1509   | 13.43155 | 12.07635 |
| C | 2.76797  | 13.02528 | 13.43834 |
| H | 3.546001 | 12.27258 | 13.27341 |
| H | 2.031008 | 12.59339 | 14.12274 |
| C | 3.446587 | 14.29212 | 14.06967 |
| C | 3.584092 | 15.22477 | 12.87383 |
| C | 4.146569 | 16.87489 | 8.134518 |
| H | 5.16162  | 16.55761 | 8.390636 |
| H | 4.207242 | 17.54304 | 7.26735  |
| H | 3.579411 | 15.98496 | 7.839659 |
| C | 2.063315 | 18.0333  | 8.894898 |
| H | 1.465403 | 17.18245 | 8.549398 |
| H | 2.119251 | 18.75955 | 8.075337 |
| H | 1.536954 | 18.49992 | 9.7345   |
| C | 2.51468  | 12.40605 | 10.9922  |
| H | 2.078998 | 12.67895 | 10.0244  |
| H | 2.134406 | 11.41377 | 11.26242 |
| H | 3.600976 | 12.33928 | 10.87001 |
| C | 0.620998 | 13.55816 | 12.14392 |
| H | 0.3064   | 14.22559 | 12.94989 |
| H | 0.16776  | 12.57633 | 12.3246  |
| H | 0.220677 | 13.94843 | 11.20137 |
| C | 6.447973 | 18.29426 | 11.14234 |
| C | 7.202662 | 17.36018 | 10.46924 |

|   |          |          |          |
|---|----------|----------|----------|
| H | 6.703813 | 16.55395 | 9.938783 |
| C | 8.606088 | 17.43644 | 10.45549 |
| C | 9.368236 | 16.40785 | 9.617971 |
| C | 10.83781 | 16.82758 | 9.458643 |
| H | 11.40582 | 15.98196 | 9.048896 |
| H | 10.89967 | 17.63241 | 8.713926 |
| C | 11.44657 | 17.29667 | 10.76731 |
| H | 12.51993 | 17.49327 | 10.64541 |
| H | 11.36141 | 16.50182 | 11.52054 |
| C | 10.76854 | 18.56769 | 11.30344 |
| C | 9.245989 | 18.44397 | 11.2064  |
| C | 8.464677 | 19.38701 | 11.88969 |
| H | 8.948129 | 20.17551 | 12.46006 |
| C | 7.081775 | 19.32488 | 11.85139 |
| C | 6.056333 | 20.16315 | 12.46564 |
| C | 6.145143 | 21.29112 | 13.26392 |
| H | 7.123297 | 21.6954  | 13.50904 |
| C | 4.989995 | 21.91686 | 13.75589 |
| C | 5.163514 | 23.15988 | 14.63263 |
| C | 3.828767 | 23.9073  | 14.7786  |
| H | 3.931853 | 24.6633  | 15.56837 |
| H | 3.625888 | 24.45746 | 13.84996 |
| C | 2.672005 | 22.97375 | 15.08481 |
| H | 1.752433 | 23.54645 | 15.26402 |
| H | 2.877088 | 22.42171 | 16.01185 |
| C | 2.413437 | 21.96894 | 13.95184 |
| C | 3.727142 | 21.36577 | 13.45273 |
| C | 3.656279 | 20.22842 | 12.62915 |
| H | 2.688405 | 19.79956 | 12.37979 |
| C | 4.799187 | 19.63331 | 12.14474 |
| C | 9.279601 | 15.03032 | 10.29916 |
| H | 9.799966 | 14.272   | 9.700928 |
| H | 8.235389 | 14.72052 | 10.40995 |
| H | 9.719825 | 15.0466  | 11.29969 |
| C | 8.762529 | 16.29646 | 8.206401 |
| H | 8.69569  | 17.28126 | 7.731673 |
| H | 7.762433 | 15.85289 | 8.214153 |
| H | 9.399027 | 15.65641 | 7.583626 |
| C | 11.21004 | 18.74494 | 12.76752 |
| H | 10.90031 | 19.70765 | 13.18434 |
| H | 12.30392 | 18.6978  | 12.82987 |
| H | 10.79345 | 17.95173 | 13.39725 |
| C | 11.23181 | 19.79604 | 10.49692 |
| H | 10.96506 | 19.70979 | 9.43915  |

|   |          |          |          |
|---|----------|----------|----------|
| H | 12.31983 | 19.91331 | 10.57222 |
| H | 10.76297 | 20.70889 | 10.87853 |
| C | 1.484538 | 20.87553 | 14.50688 |
| H | 2.006926 | 20.26342 | 15.2494  |
| H | 1.107171 | 20.2095  | 13.72629 |
| H | 0.614681 | 21.33634 | 14.99064 |
| C | 1.705741 | 22.66843 | 12.77426 |
| H | 0.743946 | 23.08389 | 13.09915 |
| H | 1.515419 | 21.95872 | 11.96254 |
| H | 2.313745 | 23.48019 | 12.36356 |
| C | 5.684102 | 22.72654 | 16.01711 |
| H | 5.824555 | 23.60219 | 16.66267 |
| H | 6.645982 | 22.2118  | 15.92424 |
| H | 4.992723 | 22.03752 | 16.51157 |
| C | 6.174435 | 24.14097 | 14.01278 |
| H | 5.902699 | 24.37894 | 12.97886 |
| H | 7.195522 | 23.74914 | 14.01524 |
| H | 6.181641 | 25.07313 | 14.59024 |
| C | 4.700195 | 13.86852 | 14.81765 |
| C | 5.879193 | 13.36408 | 14.31724 |
| H | 6.011804 | 13.29528 | 13.24001 |
| C | 6.917584 | 12.96745 | 15.17805 |
| C | 8.208934 | 12.44549 | 14.54758 |
| C | 9.336198 | 12.38975 | 15.59019 |
| H | 10.17526 | 11.81731 | 15.17298 |
| H | 9.711585 | 13.40709 | 15.7638  |
| C | 8.877974 | 11.7812  | 16.90309 |
| H | 9.724416 | 11.67323 | 17.59421 |
| H | 8.493076 | 10.76805 | 16.72599 |
| C | 7.785554 | 12.61853 | 17.58686 |
| C | 6.722793 | 13.04849 | 16.57259 |
| C | 5.520434 | 13.57573 | 17.066   |
| H | 5.372808 | 13.66774 | 18.13849 |
| C | 4.518975 | 13.98619 | 16.20286 |
| C | 3.221551 | 14.60927 | 16.44806 |
| C | 2.599043 | 15.00248 | 17.62126 |
| H | 3.083303 | 14.80482 | 18.57343 |
| C | 1.36183  | 15.66287 | 17.59394 |
| C | 0.720652 | 16.05171 | 18.92843 |
| C | -0.39613 | 17.08354 | 18.70521 |
| H | -0.96395 | 17.19781 | 19.63816 |
| H | 0.059966 | 18.06129 | 18.49892 |
| C | -1.32095 | 16.69838 | 17.56476 |
| H | -2.15334 | 17.41017 | 17.48621 |

|   |          |          |          |
|---|----------|----------|----------|
| H | -1.77162 | 15.71818 | 17.76988 |
| C | -0.59222 | 16.64318 | 16.21274 |
| C | 0.751826 | 15.9247  | 16.35008 |
| C | 1.411812 | 15.54199 | 15.1684  |
| H | 0.975932 | 15.79422 | 14.20602 |
| C | 2.612793 | 14.87042 | 15.21066 |
| C | 7.953007 | 11.04026 | 13.96785 |
| H | 7.644892 | 10.33194 | 14.74311 |
| H | 8.860386 | 10.65593 | 13.48583 |
| H | 7.155745 | 11.07206 | 13.21794 |
| C | 8.674107 | 13.36865 | 13.40908 |
| H | 8.006449 | 13.33417 | 12.54421 |
| H | 9.667923 | 13.05669 | 13.0652  |
| H | 8.731749 | 14.40946 | 13.74603 |
| C | 7.170873 | 11.75129 | 18.70009 |
| H | 6.484912 | 12.31264 | 19.34121 |
| H | 7.969094 | 11.3583  | 19.34108 |
| H | 6.623138 | 10.90358 | 18.27477 |
| C | 8.40594  | 13.87629 | 18.22584 |
| H | 8.875312 | 14.51925 | 17.47531 |
| H | 9.16389  | 13.59272 | 18.96625 |
| H | 7.639769 | 14.47263 | 18.73183 |
| C | -1.51263 | 15.91015 | 15.21972 |
| H | -1.60639 | 14.85095 | 15.4828  |
| H | -1.15287 | 15.9754  | 14.1885  |
| H | -2.51223 | 16.36052 | 15.24486 |
| C | -0.34215 | 18.06884 | 15.6882  |
| H | -1.29237 | 18.59759 | 15.54241 |
| H | 0.184196 | 18.0397  | 14.72902 |
| H | 0.275299 | 18.64944 | 16.37972 |
| C | 0.150204 | 14.78376 | 19.59354 |
| H | -0.59825 | 14.29775 | 18.96076 |
| H | -0.3151  | 15.03225 | 20.55543 |
| H | 0.945987 | 14.05408 | 19.77656 |
| C | 1.748674 | 16.6847  | 19.8826  |
| H | 2.494329 | 15.96557 | 20.23332 |
| H | 1.232847 | 17.07452 | 20.76819 |
| H | 2.274715 | 17.51386 | 19.3976  |
| H | 5.140351 | 18.30101 | 14.16061 |
| H | 4.624113 | 16.60257 | 15.22942 |

**Table S12.** Optimized coordinates of 4-K(2.2.2.crypt)<sup>-</sup> (r<sup>2</sup>-SCAN-3c).

|   |          |          |          |
|---|----------|----------|----------|
| P | 1.743704 | 10.21127 | 10.03847 |
| C | 3.846269 | 9.025045 | 6.757041 |
| C | 2.795911 | 8.015263 | 6.636504 |
| C | 2.674175 | 7.361811 | 7.874277 |
| C | 3.798191 | 7.776897 | 8.814349 |
| C | 4.329976 | 8.991044 | 8.074223 |
| C | 1.888159 | 7.748431 | 5.624651 |
| H | 1.979323 | 8.270396 | 4.675617 |
| C | 5.183108 | 10.99898 | 6.328014 |
| C | 1.626737 | 6.499852 | 8.093731 |
| H | 1.500118 | 6.078083 | 9.086922 |
| C | 2.617611 | 8.902169 | 10.88296 |
| C | 5.164322 | 9.982748 | 8.531566 |
| H | 5.452115 | 9.978725 | 9.580573 |
| C | 3.445457 | 7.89808  | 10.2834  |
| C | 5.556502 | 11.034   | 7.686288 |
| C | 0.552891 | 10.3772  | 12.93812 |
| C | 4.832593 | 5.914162 | 10.15361 |
| C | 4.014165 | 6.856586 | 11.01437 |
| C | 4.303172 | 9.999625 | 5.884288 |
| H | 3.955721 | 10.00603 | 4.85366  |
| C | 2.522111 | 8.775263 | 12.30868 |
| C | 3.075948 | 7.718377 | 13.01709 |
| C | 0.6909   | 6.223958 | 7.082193 |
| C | 3.823342 | 6.719014 | 12.38852 |
| H | 4.256459 | 5.892128 | 12.94675 |
| C | 0.822024 | 6.858318 | 5.830836 |
| C | 5.688945 | 12.0243  | 5.311446 |
| C | 2.745892 | 11.07682 | 13.35875 |
| C | 4.941282 | 6.695497 | 8.826615 |
| H | 4.891723 | 6.048028 | 7.94316  |
| H | 5.90098  | 7.223716 | 8.796756 |
| C | -0.60536 | 9.709307 | 12.61622 |
| H | -0.57423 | 8.62677  | 12.51883 |
| C | 1.919357 | 9.798944 | 13.25706 |
| C | 0.560934 | 11.77631 | 13.01141 |
| C | 2.792057 | 7.789164 | 14.50476 |
| C | -1.78707 | 10.41218 | 12.33483 |
| C | 1.929884 | 12.21355 | 13.26955 |
| C | -1.79636 | 11.81663 | 12.45472 |
| C | 4.104984 | 11.21892 | 13.52068 |
| H | 4.726968 | 10.32898 | 13.52154 |
| C | 4.693298 | 12.48974 | 13.6404  |

|   |          |          |          |
|---|----------|----------|----------|
| C | -0.60803 | 12.48398 | 12.78823 |
| H | -0.59636 | 13.56946 | 12.84729 |
| C | 4.11861  | 4.565116 | 9.967518 |
| H | 3.929053 | 4.093699 | 10.93877 |
| H | 4.732753 | 3.882796 | 9.365006 |
| H | 3.159223 | 4.693991 | 9.459467 |
| C | -0.47475 | 5.297922 | 7.431556 |
| C | 3.871077 | 13.63399 | 13.58402 |
| C | 6.223456 | 5.660757 | 10.7501  |
| H | 6.726234 | 6.609434 | 10.96684 |
| H | 6.845609 | 5.086079 | 10.05137 |
| H | 6.155071 | 5.093139 | 11.68537 |
| C | 2.492504 | 13.47501 | 13.37647 |
| H | 1.857328 | 14.35187 | 13.27963 |
| C | 1.86362  | 9.024158 | 14.61832 |
| H | 2.133468 | 9.677273 | 15.45628 |
| H | 0.83165  | 8.694019 | 14.78033 |
| C | -0.15533 | 6.619216 | 4.676247 |
| C | -3.04438 | 12.66176 | 12.18771 |
| C | 6.304519 | 12.20742 | 8.321233 |
| C | 2.067803 | 6.52123  | 14.9834  |
| H | 1.770174 | 6.617055 | 16.03609 |
| H | 2.714467 | 5.640887 | 14.89137 |
| H | 1.169823 | 6.343759 | 14.38171 |
| C | 6.199123 | 12.56817 | 13.90373 |
| C | -2.99876 | 9.603329 | 11.86885 |
| C | 4.079957 | 7.954904 | 15.32763 |
| H | 4.600117 | 8.881912 | 15.07051 |
| H | 4.76655  | 7.120936 | 15.14297 |
| H | 3.851027 | 7.981544 | 16.40104 |
| C | 6.244177 | 11.31516 | 4.062414 |
| H | 7.001206 | 10.57598 | 4.34553  |
| H | 6.709225 | 12.05001 | 3.392576 |
| H | 5.462947 | 10.79813 | 3.497159 |
| C | 4.536325 | 12.94971 | 4.87874  |
| H | 3.729048 | 12.36742 | 4.423166 |
| H | 4.885922 | 13.68713 | 4.144182 |
| H | 4.106118 | 13.48211 | 5.731831 |
| C | -1.43989 | 6.057018 | 8.362869 |
| H | -1.8456  | 6.952881 | 7.883065 |
| H | -0.91631 | 6.392189 | 9.263167 |
| H | -2.27527 | 5.411879 | 8.665718 |
| C | 4.420936 | 15.06119 | 13.67403 |
| C | -1.20459 | 4.840716 | 6.159593 |

|   |          |          |          |
|---|----------|----------|----------|
| H | -0.60495 | 4.06425  | 5.664619 |
| H | -2.15293 | 4.364867 | 6.445954 |
| C | 0.016429 | 4.03441  | 8.161288 |
| H | 0.412082 | 4.255373 | 9.156669 |
| H | 0.804308 | 3.534609 | 7.586643 |
| H | -0.8187  | 3.333523 | 8.287014 |
| C | -0.53904 | 7.936464 | 3.977817 |
| H | -0.88738 | 8.674898 | 4.707435 |
| H | -1.34658 | 7.749145 | 3.258723 |
| H | 0.296114 | 8.374726 | 3.423569 |
| C | 5.86082  | 15.06371 | 14.21339 |
| H | 6.302319 | 16.05439 | 14.03501 |
| H | 5.835247 | 14.93047 | 15.30345 |
| C | -1.45634 | 5.983625 | 5.192895 |
| H | -2.0559  | 6.759088 | 5.688395 |
| H | -2.04654 | 5.636778 | 4.332784 |
| C | 6.720607 | 13.9784  | 13.58988 |
| H | 7.758642 | 14.06299 | 13.94144 |
| H | 6.74836  | 14.10707 | 12.49895 |
| C | 6.452327 | 12.21841 | 15.38487 |
| H | 5.901999 | 12.88343 | 16.05751 |
| H | 7.522413 | 12.28466 | 15.62243 |
| H | 6.116033 | 11.1968  | 15.59117 |
| C | -2.86866 | 13.41983 | 10.85756 |
| H | -2.00019 | 14.08449 | 10.90527 |
| H | -3.75721 | 14.02723 | 10.63986 |
| H | -2.69871 | 12.73288 | 10.02348 |
| C | 7.677358 | 11.74056 | 8.839041 |
| H | 7.570293 | 10.90801 | 9.541314 |
| H | 8.18672  | 12.56064 | 9.361374 |
| H | 8.318767 | 11.39871 | 8.019011 |
| C | 6.835965 | 12.84577 | 5.921975 |
| H | 7.734954 | 12.21491 | 5.971087 |
| H | 7.074542 | 13.68167 | 5.249401 |
| C | 6.995241 | 11.5785  | 13.03662 |
| H | 6.769623 | 10.53481 | 13.27289 |
| H | 8.069364 | 11.7284  | 13.20422 |
| H | 6.790786 | 11.73845 | 11.97401 |
| C | -3.26717 | 13.68906 | 13.31223 |
| H | -3.30109 | 13.19257 | 14.28817 |
| H | -4.21976 | 14.21157 | 13.15527 |
| H | -2.47741 | 14.44504 | 13.34492 |
| C | 0.511051 | 5.69539  | 3.637945 |
| H | 1.433943 | 6.149716 | 3.261924 |

|   |          |          |          |
|---|----------|----------|----------|
| H | -0.16144 | 5.522693 | 2.787306 |
| H | 0.778373 | 4.72737  | 4.073064 |
| C | 5.47891  | 12.75847 | 9.499128 |
| H | 4.480186 | 13.05878 | 9.166172 |
| H | 5.986965 | 13.63387 | 9.926101 |
| H | 5.3297   | 12.02579 | 10.29619 |
| C | 6.492857 | 13.35297 | 7.311247 |
| H | 5.56923  | 13.94397 | 7.263324 |
| H | 7.273198 | 14.0316  | 7.682171 |
| C | 4.389314 | 15.69726 | 12.27019 |
| H | 4.760393 | 16.72998 | 12.30694 |
| H | 3.368814 | 15.71046 | 11.87437 |
| H | 4.99982  | 15.12994 | 11.56174 |
| C | 3.574749 | 15.92752 | 14.62419 |
| H | 3.476979 | 15.44587 | 15.60321 |
| H | 2.568795 | 16.11206 | 14.23633 |
| H | 4.058168 | 16.90294 | 14.76452 |
| C | -4.29393 | 11.76979 | 12.12525 |
| H | -4.56944 | 11.47235 | 13.14665 |
| H | -5.13417 | 12.36157 | 11.73551 |
| C | -2.5847  | 8.606793 | 10.76916 |
| H | -3.47902 | 8.1756   | 10.30047 |
| H | -1.99166 | 7.778452 | 11.16663 |
| H | -1.98018 | 9.1014   | 10.00157 |
| C | -4.07238 | 10.52962 | 11.27728 |
| H | -3.7665  | 10.82433 | 10.26476 |
| H | -5.00764 | 9.963195 | 11.16706 |
| C | -3.58051 | 8.812965 | 13.05646 |
| H | -3.94034 | 9.477059 | 13.84947 |
| H | -2.81532 | 8.164128 | 13.49511 |
| H | -4.41549 | 8.181984 | 12.72417 |
| H | 2.184778 | 9.874152 | 8.732155 |

**Table S13.** Optimized coordinates of **6**-K(**2.2.2**-crypt)<sup>-</sup> (r<sup>2</sup>-SCAN-3c).

|   |          |          |          |
|---|----------|----------|----------|
| P | 7.388078 | 15.13383 | 17.19086 |
| O | 5.529638 | 13.09063 | 16.83345 |
| C | 8.150309 | 13.84298 | 14.83747 |
| C | 8.368065 | 13.92089 | 16.22761 |
| C | 9.259328 | 12.9699  | 16.76393 |
| C | 10.17169 | 14.02403 | 18.97292 |
| C | 9.546946 | 11.87333 | 14.61504 |
| H | 9.975249 | 11.07708 | 14.00798 |
| O | 5.273664 | 14.35675 | 18.70158 |

|   |          |          |          |
|---|----------|----------|----------|
| C | 6.187938 | 15.57423 | 14.29431 |
| C | 8.702417 | 12.82639 | 14.05739 |
| C | 9.838598 | 11.9761  | 15.96993 |
| C | 7.500074 | 14.89094 | 13.93724 |
| C | 9.605783 | 14.07667 | 20.25645 |
| C | 9.78888  | 16.13287 | 13.61246 |
| H | 10.33991 | 15.19754 | 13.59497 |
| C | 8.280057 | 12.8947  | 12.60328 |
| C | 8.576338 | 13.04516 | 20.34385 |
| C | 9.678727 | 12.8016  | 18.21717 |
| C | 8.557256 | 12.33198 | 19.1369  |
| C | 8.425263 | 16.09891 | 13.80401 |
| C | 6.314429 | 16.96882 | 14.21509 |
| C | 11.04387 | 15.00389 | 18.56117 |
| H | 11.42063 | 14.97974 | 17.54038 |
| C | 10.47317 | 17.35243 | 13.47504 |
| C | 3.826181 | 15.81453 | 14.76477 |
| C | 4.956616 | 15.00893 | 14.54874 |
| H | 4.87974  | 13.93152 | 14.6436  |
| C | 5.211608 | 17.77741 | 14.42898 |
| H | 5.322433 | 18.85754 | 14.37397 |
| C | 10.91574 | 16.05693 | 20.74296 |
| C | 11.39646 | 16.06174 | 19.41933 |
| C | 10.74681 | 11.04848 | 16.75148 |
| C | 3.959988 | 17.21899 | 14.7224  |
| C | 7.706172 | 17.29539 | 13.92637 |
| C | 9.998833 | 15.07011 | 21.13723 |
| H | 9.573433 | 15.09641 | 22.13703 |
| C | 10.85496 | 11.76687 | 18.11758 |
| H | 11.79952 | 12.32093 | 18.15986 |
| H | 10.84071 | 11.07138 | 18.96356 |
| C | 11.97101 | 17.31191 | 13.16544 |
| C | 7.593624 | 12.82235 | 21.29279 |
| H | 7.57471  | 13.43139 | 22.19266 |
| C | 7.565791 | 11.40622 | 18.90036 |
| H | 7.507589 | 10.92748 | 17.92879 |
| C | 9.74687  | 18.55839 | 13.56039 |
| C | 6.573063 | 11.89199 | 21.06224 |
| C | 6.564984 | 11.1645  | 19.8536  |
| C | 7.329311 | 14.11865 | 12.58613 |
| H | 6.291673 | 13.77414 | 12.52997 |
| H | 7.50566  | 14.77806 | 11.72912 |
| C | 8.36731  | 18.50808 | 13.81084 |
| H | 7.806815 | 19.43171 | 13.93051 |

|   |          |          |          |
|---|----------|----------|----------|
| C | 2.497109 | 15.12513 | 15.07839 |
| C | 9.473446 | 13.07225 | 11.6525  |
| H | 9.999346 | 14.01262 | 11.83948 |
| H | 9.130817 | 13.08065 | 10.61003 |
| H | 10.19076 | 12.2509  | 11.76617 |
| C | 5.804013 | 13.98466 | 17.64833 |
| C | 12.25126 | 17.18891 | 18.83624 |
| C | 11.33534 | 17.11159 | 21.76801 |
| C | 7.520387 | 11.61701 | 12.21122 |
| H | 8.18304  | 10.7437  | 12.23031 |
| H | 7.107982 | 11.70879 | 11.1982  |
| H | 6.697477 | 11.43431 | 12.90986 |
| C | 12.12631 | 10.92327 | 16.09026 |
| H | 12.05789 | 10.40499 | 15.12654 |
| H | 12.81043 | 10.35241 | 16.73082 |
| H | 12.5604  | 11.91348 | 15.91354 |
| C | 10.13032 | 9.647024 | 16.88673 |
| H | 9.177919 | 9.68216  | 17.42187 |
| H | 10.80718 | 8.983493 | 17.43986 |
| H | 9.949318 | 9.207526 | 15.8989  |
| C | 10.40572 | 19.93798 | 13.45833 |
| C | 2.786733 | 18.17951 | 14.94557 |
| C | 5.420029 | 11.84394 | 22.06874 |
| C | 5.507799 | 10.10254 | 19.54916 |
| C | 12.61229 | 18.6698  | 13.48731 |
| H | 12.67098 | 18.78004 | 14.57916 |
| H | 13.64645 | 18.67385 | 13.11559 |
| C | 12.15104 | 16.97357 | 11.67075 |
| H | 11.63306 | 17.69125 | 11.02752 |
| H | 11.73283 | 15.98428 | 11.45686 |
| H | 13.21528 | 16.96399 | 11.40064 |
| C | 12.70918 | 16.24044 | 13.98566 |
| H | 13.78775 | 16.31891 | 13.80071 |
| H | 12.40468 | 15.22392 | 13.72015 |
| H | 12.53684 | 16.37709 | 15.05743 |
| C | 2.511757 | 14.64041 | 16.54099 |
| H | 2.710663 | 15.4558  | 17.24186 |
| H | 3.303153 | 13.90104 | 16.69824 |
| H | 1.544919 | 14.18514 | 16.79563 |
| C | 1.565722 | 17.43899 | 15.51598 |
| H | 1.712345 | 17.28178 | 16.59208 |
| H | 0.683004 | 18.08591 | 15.41275 |
| C | 3.163679 | 19.28541 | 15.94739 |
| H | 2.275367 | 19.88372 | 16.18767 |

|   |          |          |          |
|---|----------|----------|----------|
| H | 3.923505 | 19.96678 | 15.55277 |
| H | 3.549102 | 18.84764 | 16.87405 |
| C | 1.333126 | 16.0993  | 14.84173 |
| H | 0.407346 | 15.63952 | 15.2143  |
| H | 1.19811  | 16.24389 | 13.75975 |
| C | 2.272284 | 13.90633 | 14.16626 |
| H | 2.971378 | 13.09525 | 14.38663 |
| H | 2.377248 | 14.17989 | 13.10972 |
| H | 1.25841  | 13.51713 | 14.32343 |
| C | 2.414359 | 18.83491 | 13.60078 |
| H | 2.106625 | 18.08478 | 12.86531 |
| H | 3.270564 | 19.37293 | 13.18065 |
| H | 1.59137  | 19.54892 | 13.73626 |
| C | 4.229177 | 10.40231 | 20.34532 |
| H | 3.526095 | 9.567201 | 20.2165  |
| H | 3.754528 | 11.29084 | 19.90865 |
| C | 5.128215 | 10.06195 | 18.0601  |
| H | 5.931478 | 9.650676 | 17.43928 |
| H | 4.893385 | 11.06372 | 17.68421 |
| H | 4.256119 | 9.407814 | 17.93264 |
| C | 6.082764 | 8.725946 | 19.94403 |
| H | 5.343274 | 7.935191 | 19.75929 |
| H | 6.379065 | 8.688826 | 20.99722 |
| H | 6.974927 | 8.508309 | 19.346   |
| C | 4.508926 | 10.63112 | 21.82043 |
| H | 4.974835 | 9.733859 | 22.25063 |
| H | 3.569922 | 10.78313 | 22.3707  |
| C | 5.930346 | 11.7488  | 23.51638 |
| H | 5.079059 | 11.63138 | 24.1992  |
| H | 6.477508 | 12.64385 | 23.82688 |
| H | 6.592502 | 10.88407 | 23.64061 |
| C | 4.608482 | 13.14583 | 21.89917 |
| H | 3.729072 | 13.13534 | 22.5571  |
| H | 4.294918 | 13.28949 | 20.8609  |
| H | 5.221586 | 14.01635 | 22.15379 |
| C | 12.58961 | 17.84669 | 21.27045 |
| H | 12.80365 | 18.68617 | 21.94659 |
| H | 13.44803 | 17.16262 | 21.33574 |
| C | 10.17888 | 18.10386 | 21.99334 |
| H | 10.4685  | 18.87662 | 22.7174  |
| H | 9.298413 | 17.58158 | 22.38129 |
| H | 9.87692  | 18.59126 | 21.06191 |
| C | 11.68992 | 16.45926 | 23.11615 |
| H | 12.44314 | 15.67518 | 22.9823  |

|   |          |          |          |
|---|----------|----------|----------|
| H | 10.81931 | 16.01211 | 23.60416 |
| H | 12.096   | 17.21809 | 23.7969  |
| C | 12.43088 | 18.33926 | 19.84383 |
| H | 13.29843 | 18.94224 | 19.54273 |
| H | 11.56276 | 19.008   | 19.78738 |
| C | 11.5561  | 17.77464 | 17.59271 |
| H | 10.55596 | 18.14182 | 17.84629 |
| H | 11.43297 | 17.04371 | 16.78944 |
| H | 12.14858 | 18.61356 | 17.20423 |
| C | 13.6324  | 16.63962 | 18.43242 |
| H | 14.23293 | 17.42727 | 17.95997 |
| H | 13.53723 | 15.81398 | 17.72031 |
| H | 14.17841 | 16.26174 | 19.30393 |
| C | 11.83152 | 19.82882 | 12.8926  |
| H | 11.77602 | 19.71175 | 11.80202 |
| H | 12.35524 | 20.77808 | 13.07247 |
| C | 9.610361 | 20.86655 | 12.52309 |
| H | 8.627015 | 21.12233 | 12.92787 |
| H | 9.461833 | 20.39675 | 11.54473 |
| H | 10.1615  | 21.80433 | 12.37732 |
| C | 10.44901 | 20.5744  | 14.86141 |
| H | 10.89277 | 21.57747 | 14.81547 |
| H | 11.03207 | 19.96494 | 15.55771 |
| H | 9.440506 | 20.66201 | 15.27782 |
| H | 8.008596 | 14.93412 | 18.43891 |

**Table S14.** Optimized coordinates of **7** ( $r^2$ -SCAN-3c).

|   |          |          |          |
|---|----------|----------|----------|
| P | 3.731284 | 16.28576 | 11.85159 |
| C | 3.483933 | 14.4935  | 11.49255 |
| C | 3.008523 | 13.79725 | 12.59307 |
| C | 2.685471 | 14.54335 | 13.83713 |
| C | 3.08426  | 13.47619 | 14.91204 |
| H | 4.129877 | 13.64811 | 15.19645 |
| H | 2.471193 | 13.54486 | 15.81649 |
| C | 2.967685 | 12.06453 | 14.22036 |
| C | 3.071911 | 12.42396 | 12.74064 |
| C | 3.367731 | 11.65235 | 11.61631 |
| H | 3.402791 | 10.56514 | 11.6624  |
| C | 3.654433 | 12.32448 | 10.42065 |
| C | 3.924068 | 11.69096 | 9.06739  |
| C | 4.065071 | 12.9267  | 8.128139 |
| H | 3.146117 | 13.04346 | 7.543503 |
| H | 4.893495 | 12.81831 | 7.421089 |

|   |          |          |          |
|---|----------|----------|----------|
| C | 4.239746 | 14.20549 | 9.015986 |
| C | 3.779154 | 13.71719 | 10.37055 |
| C | 4.144711 | 11.17173 | 14.63356 |
| H | 5.09816  | 11.62055 | 14.33542 |
| H | 4.072436 | 10.18308 | 14.166   |
| H | 4.152347 | 11.02907 | 15.72082 |
| C | 1.656374 | 11.34876 | 14.57375 |
| H | 1.640045 | 11.08139 | 15.63682 |
| H | 1.554735 | 10.42742 | 13.98934 |
| H | 0.786622 | 11.97754 | 14.37331 |
| C | 2.736948 | 10.81781 | 8.63338  |
| H | 2.625572 | 9.949481 | 9.292488 |
| H | 2.88518  | 10.44916 | 7.611265 |
| H | 1.80332  | 11.3895  | 8.663574 |
| C | 5.192623 | 10.82491 | 9.085478 |
| H | 6.07423  | 11.4086  | 9.362888 |
| H | 5.371902 | 10.38715 | 8.096458 |
| H | 5.091561 | 10.00488 | 9.805275 |
| C | 1.276148 | 15.09934 | 14.04574 |
| C | 0.048598 | 14.52429 | 13.80829 |
| H | 0.002176 | 13.55335 | 13.32555 |
| C | -1.14505 | 15.19409 | 14.13173 |
| C | -2.46518 | 14.49093 | 13.81292 |
| C | -3.64207 | 15.47315 | 13.92343 |
| H | -3.66018 | 16.11014 | 13.02899 |
| H | -4.58022 | 14.9027  | 13.91466 |
| C | -3.55764 | 16.3402  | 15.16675 |
| H | -3.52644 | 15.70259 | 16.0605  |
| H | -4.45647 | 16.96345 | 15.26317 |
| C | -2.32098 | 17.2517  | 15.16051 |
| C | -1.07758 | 16.4621  | 14.74459 |
| C | 0.175832 | 17.0601  | 14.9345  |
| H | 0.236182 | 18.06615 | 15.34063 |
| C | 1.342779 | 16.40446 | 14.57651 |
| C | 2.721158 | 16.87554 | 14.51596 |
| C | 3.362828 | 17.98654 | 14.93429 |
| H | 2.824393 | 18.75149 | 15.48446 |
| C | 4.7856   | 18.17617 | 14.67209 |
| C | 5.403641 | 19.45633 | 15.23398 |
| C | 6.938061 | 19.38004 | 15.20219 |
| H | 7.278784 | 18.74712 | 16.03286 |
| H | 7.34501  | 20.38242 | 15.39109 |
| C | 7.465135 | 18.82873 | 13.89048 |
| H | 8.563026 | 18.84982 | 13.87659 |

|   |          |          |          |
|---|----------|----------|----------|
| H | 7.131249 | 19.46491 | 13.06035 |
| C | 6.988246 | 17.39191 | 13.63204 |
| C | 5.506567 | 17.25646 | 13.95822 |
| C | 4.858623 | 16.03117 | 13.4469  |
| H | 5.476143 | 15.13837 | 13.34922 |
| C | 3.440511 | 15.86131 | 13.75909 |
| C | -2.46044 | 13.93283 | 12.37829 |
| H | -2.20154 | 14.71572 | 11.65754 |
| H | -3.45856 | 13.55224 | 12.13041 |
| H | -1.75519 | 13.10627 | 12.25027 |
| C | -2.6587  | 13.32004 | 14.79648 |
| H | -1.83118 | 12.60679 | 14.71878 |
| H | -3.59077 | 12.78554 | 14.57555 |
| H | -2.69507 | 13.66559 | 15.83418 |
| C | -2.52838 | 18.42132 | 14.17839 |
| H | -2.66444 | 18.06927 | 13.15125 |
| H | -1.65986 | 19.08795 | 14.1804  |
| H | -3.40965 | 19.00863 | 14.46431 |
| C | -2.15939 | 17.8252  | 16.57961 |
| H | -3.10282 | 18.28298 | 16.90042 |
| H | -1.38705 | 18.59786 | 16.63299 |
| H | -1.90034 | 17.03539 | 17.29279 |
| C | 7.24741  | 17.07012 | 12.15132 |
| H | 6.666321 | 17.72474 | 11.49365 |
| H | 6.996184 | 16.03934 | 11.88804 |
| H | 8.31098  | 17.22215 | 11.93368 |
| C | 7.795104 | 16.40176 | 14.49833 |
| H | 8.860749 | 16.46626 | 14.24661 |
| H | 7.476167 | 15.36846 | 14.32521 |
| H | 7.676646 | 16.61071 | 15.56589 |
| C | 4.910189 | 20.65351 | 14.39827 |
| H | 5.23241  | 20.57193 | 13.35584 |
| H | 5.297882 | 21.59221 | 14.81259 |
| H | 3.816395 | 20.70745 | 14.39873 |
| C | 4.990709 | 19.67326 | 16.70246 |
| H | 3.932984 | 19.92766 | 16.81401 |
| H | 5.570707 | 20.5038  | 17.1218  |
| H | 5.192442 | 18.7783  | 17.301   |
| C | 5.653255 | 14.78118 | 8.984294 |
| C | 6.840163 | 14.22187 | 9.401793 |
| H | 6.828899 | 13.25701 | 9.899273 |
| C | 8.066247 | 14.88358 | 9.207026 |
| C | 9.340145 | 14.18589 | 9.687057 |
| C | 10.52231 | 15.16689 | 9.673263 |

|   |          |          |          |
|---|----------|----------|----------|
| H | 10.4289  | 15.84699 | 10.53147 |
| H | 11.45329 | 14.6043  | 9.823383 |
| C | 10.58752 | 15.97272 | 8.388269 |
| H | 10.65906 | 15.29309 | 7.528787 |
| H | 11.49428 | 16.59177 | 8.366936 |
| C | 9.363036 | 16.88521 | 8.206451 |
| C | 8.075145 | 16.13298 | 8.555544 |
| C | 6.85264  | 16.72463 | 8.202289 |
| H | 6.84484  | 17.70952 | 7.742833 |
| C | 5.654174 | 16.06506 | 8.415014 |
| C | 4.270222 | 16.46239 | 8.164299 |
| C | 3.711062 | 17.65331 | 7.730856 |
| H | 4.359112 | 18.47841 | 7.448282 |
| C | 2.318467 | 17.81819 | 7.686134 |
| C | 1.768867 | 19.16645 | 7.214991 |
| C | 0.26026  | 19.06294 | 6.93969  |
| H | -0.14335 | 20.07448 | 6.799371 |
| H | 0.106584 | 18.53391 | 5.989314 |
| C | -0.48081 | 18.34272 | 8.051553 |
| H | -1.56411 | 18.37027 | 7.87404  |
| H | -0.31086 | 18.86092 | 9.004504 |
| C | -0.03913 | 16.87749 | 8.193252 |
| C | 1.484225 | 16.76409 | 8.113723 |
| C | 2.068785 | 15.54766 | 8.502313 |
| H | 1.440437 | 14.7238  | 8.832834 |
| C | 3.436658 | 15.39807 | 8.527815 |
| C | 9.184687 | 13.66757 | 11.12822 |
| H | 8.897119 | 14.47761 | 11.80677 |
| H | 10.14105 | 13.25613 | 11.47308 |
| H | 8.438988 | 12.87125 | 11.21113 |
| C | 9.632816 | 12.98435 | 8.766297 |
| H | 8.80389  | 12.26896 | 8.790536 |
| H | 10.54201 | 12.46491 | 9.09304  |
| H | 9.764654 | 13.29453 | 7.725303 |
| C | 9.502668 | 18.13119 | 9.100474 |
| H | 9.617649 | 17.86041 | 10.15369 |
| H | 8.618317 | 18.77204 | 9.023161 |
| H | 10.37865 | 18.71826 | 8.798495 |
| C | 9.338318 | 17.33885 | 6.734971 |
| H | 10.31703 | 17.75101 | 6.460939 |
| H | 8.591297 | 18.11631 | 6.549815 |
| H | 9.122158 | 16.4942  | 6.072239 |
| C | -0.55118 | 16.36598 | 9.55381  |
| H | -0.0253  | 16.85542 | 10.38098 |

|   |          |          |          |
|---|----------|----------|----------|
| H | -0.4253  | 15.28541 | 9.669011 |
| H | -1.62254 | 16.58378 | 9.645949 |
| C | -0.6706  | 16.02491 | 7.075639 |
| H | -1.76503 | 16.06415 | 7.138908 |
| H | -0.36113 | 14.97832 | 7.164516 |
| H | -0.3681  | 16.37285 | 6.082941 |
| C | 2.03878  | 20.22774 | 8.299528 |
| H | 1.574124 | 19.95864 | 9.252828 |
| H | 1.64935  | 21.20363 | 7.984042 |
| H | 3.113434 | 20.33102 | 8.481172 |
| C | 2.448635 | 19.61139 | 5.90817  |
| H | 3.507651 | 19.84777 | 6.046475 |
| H | 1.958377 | 20.51553 | 5.527514 |
| H | 2.371111 | 18.83035 | 5.144295 |

**Table S15.** Optimized coordinates of **8** (r<sup>2</sup>-SCAN-3c).

|   |          |          |          |
|---|----------|----------|----------|
| P | 3.120048 | 7.389568 | 11.92835 |
| O | 3.908088 | 4.741128 | 11.29164 |
| C | 1.50196  | 6.922181 | 12.74377 |
| C | 0.325767 | 6.807346 | 11.99387 |
| C | 0.174243 | 6.839087 | 10.48443 |
| C | -1.3787  | 6.956455 | 10.30381 |
| H | -1.61508 | 8.007237 | 10.10487 |
| H | -1.72284 | 6.371807 | 9.444996 |
| C | -2.05576 | 6.524234 | 11.63101 |
| C | -0.9073  | 6.593214 | 12.61803 |
| C | -0.99409 | 6.479671 | 13.99925 |
| H | -1.95539 | 6.314738 | 14.48309 |
| C | 0.167705 | 6.602777 | 14.75325 |
| C | 0.262489 | 6.554756 | 16.26415 |
| C | 1.788318 | 6.690762 | 16.52172 |
| H | 2.189152 | 5.736264 | 16.87702 |
| H | 2.0103   | 7.440605 | 17.28736 |
| C | 2.494826 | 7.056584 | 15.17145 |
| C | 1.401993 | 6.825095 | 14.13891 |
| C | -0.26576 | 5.217841 | 16.80446 |
| H | -1.33878 | 5.107965 | 16.61069 |
| H | -0.11153 | 5.154402 | 17.88806 |
| H | 0.253252 | 4.376982 | 16.33203 |
| C | -0.53123 | 7.703973 | 16.90438 |
| H | -0.16748 | 8.677511 | 16.56291 |
| H | -0.43627 | 7.669566 | 17.99588 |

|   |          |          |          |
|---|----------|----------|----------|
| H | -1.59575 | 7.633205 | 16.65435 |
| C | -2.6388  | 5.104557 | 11.55065 |
| H | -3.47411 | 5.077297 | 10.84124 |
| H | -3.01288 | 4.782622 | 12.52916 |
| H | -1.89058 | 4.38144  | 11.21715 |
| C | -3.1776  | 7.500423 | 12.0126  |
| H | -2.78452 | 8.513912 | 12.14562 |
| H | -3.66633 | 7.19765  | 12.94546 |
| H | -3.94282 | 7.525957 | 11.22805 |
| C | 0.878036 | 7.95567  | 9.732988 |
| C | 0.875216 | 9.308117 | 9.993327 |
| H | 0.350046 | 9.6788   | 10.87073 |
| C | 1.586709 | 10.19974 | 9.17333  |
| C | 2.280885 | 9.69816  | 8.051322 |
| C | 2.25847  | 8.319924 | 7.793196 |
| H | 2.796256 | 7.924425 | 6.936378 |
| C | 1.582419 | 7.450572 | 8.632916 |
| C | 1.521224 | 5.992906 | 8.676792 |
| C | 2.135483 | 5.02328  | 7.902208 |
| H | 2.726596 | 5.324674 | 7.041706 |
| C | 2.032863 | 3.663936 | 8.233768 |
| C | 2.76444  | 2.652099 | 7.349504 |
| C | 2.303304 | 1.221995 | 7.671199 |
| H | 1.313724 | 1.056483 | 7.224073 |
| H | 2.984722 | 0.512928 | 7.182651 |
| C | 2.239127 | 0.955277 | 9.164344 |
| H | 3.225253 | 1.127737 | 9.615824 |
| H | 1.99065  | -0.09691 | 9.356511 |
| C | 1.206424 | 1.844803 | 9.874203 |
| C | 1.326702 | 3.292339 | 9.395379 |
| C | 0.691114 | 4.287709 | 10.15705 |
| H | 0.174487 | 4.011586 | 11.07115 |
| C | 0.767506 | 5.613878 | 9.798236 |
| C | -0.22046 | 1.338368 | 9.586018 |
| H | -0.45491 | 1.371067 | 8.517595 |
| H | -0.96104 | 1.959039 | 10.1019  |
| H | -0.3377  | 0.305544 | 9.93688  |
| C | 1.470052 | 1.740268 | 11.3872  |
| H | 1.533384 | 0.684436 | 11.6771  |
| H | 0.675006 | 2.194947 | 11.98619 |
| H | 2.414371 | 2.227535 | 11.64771 |
| C | 2.476412 | 2.906942 | 5.859648 |
| H | 1.39805  | 2.928443 | 5.669134 |
| H | 2.916429 | 2.102759 | 5.257734 |

|   |          |          |          |
|---|----------|----------|----------|
| H | 2.903322 | 3.849793 | 5.505785 |
| C | 4.281002 | 2.787249 | 7.589553 |
| H | 4.623846 | 3.796051 | 7.33769  |
| H | 4.831358 | 2.072774 | 6.96505  |
| H | 4.542259 | 2.610317 | 8.637163 |
| C | 3.793681 | 6.28302  | 15.01045 |
| C | 3.982422 | 4.921295 | 14.94338 |
| H | 3.117148 | 4.262177 | 14.95668 |
| C | 5.273839 | 4.374812 | 14.84371 |
| C | 5.405323 | 2.850718 | 14.80745 |
| C | 6.817371 | 2.43572  | 14.36565 |
| H | 6.947873 | 1.36418  | 14.56698 |
| H | 6.899414 | 2.557628 | 13.27753 |
| C | 7.902917 | 3.242152 | 15.05411 |
| H | 8.896078 | 2.867242 | 14.77306 |
| H | 7.822741 | 3.120303 | 16.14281 |
| C | 7.826269 | 4.738665 | 14.71391 |
| C | 6.386123 | 5.242944 | 14.83552 |
| C | 6.174775 | 6.628776 | 14.89936 |
| H | 7.025066 | 7.304393 | 14.878   |
| C | 4.895437 | 7.148847 | 14.9924  |
| C | 4.404567 | 8.523569 | 15.04912 |
| C | 5.057663 | 9.744861 | 15.00096 |
| H | 6.140761 | 9.768608 | 14.9213  |
| C | 4.339943 | 10.94975 | 15.04252 |
| C | 5.127538 | 12.25955 | 14.94885 |
| C | 4.253261 | 13.45398 | 15.36456 |
| H | 4.175426 | 13.47704 | 16.45955 |
| H | 4.763884 | 14.38123 | 15.07275 |
| C | 2.86322  | 13.40212 | 14.75513 |
| H | 2.297283 | 14.30664 | 15.01497 |
| H | 2.938719 | 13.38625 | 13.65957 |
| C | 2.06892  | 12.17022 | 15.21373 |
| C | 2.930479 | 10.9111  | 15.10416 |
| C | 2.284819 | 9.664402 | 15.13563 |
| H | 1.200068 | 9.62021  | 15.15759 |
| C | 3.005502 | 8.491102 | 15.12358 |
| C | 5.109054 | 2.299818 | 16.21657 |
| H | 5.807085 | 2.696978 | 16.95992 |
| H | 5.180627 | 1.205154 | 16.22139 |
| H | 4.098858 | 2.577485 | 16.53573 |
| C | 4.412233 | 2.224614 | 13.81402 |
| H | 3.37079  | 2.335887 | 14.1305  |
| H | 4.611382 | 1.149707 | 13.72451 |

|   |          |          |          |
|---|----------|----------|----------|
| H | 4.517838 | 2.680483 | 12.82514 |
| C | 8.767534 | 5.478367 | 15.68067 |
| H | 8.385712 | 5.437035 | 16.70637 |
| H | 8.907416 | 6.528956 | 15.41038 |
| H | 9.756087 | 5.004188 | 15.66246 |
| C | 8.311737 | 4.983201 | 13.2714  |
| H | 9.343087 | 4.629646 | 13.14872 |
| H | 8.284922 | 6.051816 | 13.03375 |
| H | 7.678491 | 4.472096 | 12.53996 |
| C | 1.633631 | 12.3307  | 16.68513 |
| H | 1.020918 | 13.23246 | 16.80753 |
| H | 2.494255 | 12.40011 | 17.3569  |
| H | 1.040183 | 11.46668 | 17.00328 |
| C | 0.803041 | 12.0829  | 14.34423 |
| H | 0.097199 | 11.32547 | 14.69809 |
| H | 1.057628 | 11.8558  | 13.30457 |
| H | 0.280963 | 13.04689 | 14.3641  |
| C | 6.358641 | 12.24556 | 15.8718  |
| H | 7.119257 | 11.53006 | 15.54658 |
| H | 6.073433 | 11.99759 | 16.89977 |
| H | 6.824977 | 13.23796 | 15.87394 |
| C | 5.603775 | 12.43752 | 13.49315 |
| H | 6.180854 | 13.36481 | 13.39024 |
| H | 4.760865 | 12.47104 | 12.79628 |
| H | 6.242003 | 11.60064 | 13.19103 |
| C | 3.526798 | 5.80357  | 11.57542 |
| C | 3.023224 | 10.60286 | 7.063044 |
| C | 1.654258 | 11.66773 | 9.592888 |
| C | 3.287989 | 11.98735 | 7.676009 |
| H | 4.137168 | 11.9141  | 8.368027 |
| H | 3.601817 | 12.67162 | 6.876526 |
| C | 2.081333 | 12.54731 | 8.408286 |
| H | 1.235097 | 12.64456 | 7.714758 |
| H | 2.296241 | 13.55904 | 8.77789  |
| C | 4.386405 | 10.00968 | 6.664581 |
| H | 4.290538 | 9.104973 | 6.057489 |
| H | 4.943381 | 10.74247 | 6.068626 |
| H | 4.979652 | 9.765173 | 7.552066 |
| C | 2.15859  | 10.74486 | 5.794291 |
| H | 1.971924 | 9.764257 | 5.344355 |
| H | 1.185248 | 11.19163 | 6.018998 |
| H | 2.667736 | 11.373   | 5.052983 |
| C | 0.29451  | 12.1861  | 10.09062 |
| H | -0.48814 | 12.01115 | 9.344405 |

|   |          |          |          |
|---|----------|----------|----------|
| H | -0.01672 | 11.71727 | 11.02838 |
| H | 0.359858 | 13.26502 | 10.27482 |
| C | 2.678189 | 11.78864 | 10.74041 |
| H | 2.3945   | 11.14832 | 11.58257 |
| H | 3.677561 | 11.47288 | 10.42676 |
| H | 2.733298 | 12.8263  | 11.09477 |

## 5. References.

1. D. Wang, C. Zhai, Y. Chen, Y. He, X.-d. Chen, S. Wang, L. Zhao, G. Frenking, X. Wang and G. Tan, *Nat. Chem.*, 2022, **15**(2), 200–205.
2. P. J. Bailey, R. A. Coxall, C. M. Dick, S. Fabre, L. C. Henderson, C. Herber, S. T. Liddle, D. Loroño-González, A. Parkin and S. Parsons, *Chem.–Eur. J.*, 2003, **9**(19), 4820–4828.
3. J. S. Wenger, N. Gaschik, W. J. Rowe, A. E. Crumpton, B. van IJzendoorn and M. Mehta, *Chem. Sci.*, 2026, DOI: 10.1039/d6sc00723f.
4. Rigaku Oxford Diffraction, *CrysAlis<sup>Pro</sup>*, 2020.
5. O. V. Dolomanov, L. J. Bourhis, R. J. Gildea, J. A. K. Howard and H. Puschmann, *J. Appl. Crystallogr.*, 2009, **42**(2), 339–341.
6. (a) G. M. Sheldrick, *Acta Crystallogr. Sect. A*, 2015, **71**(1), 3–8; (b) G. M. Sheldrick, *Acta Crystallogr. Sect. C*, 2015, **71**(1), 3–8; (c) P. Müller, *Crystallogr. Rev.*, 2009, **15**(1), 57–83.
7. F. Neese, *Wiley Interdiscip. Rev.: Comput. Mol. Sci.*, 2025, **15**(2).
8. (a) S. Grimme, A. Hansen, S. Ehlert and J.-M. Mewes, *J. Chem. Phys.*, 2021, **154**(6); (b) F. Neese, *J. Comput. Chem.*, 2003, **24**(14), 1740–1747; (c) D. Bykov, T. Petrenko, R. Izsák, S. Kossmann, U. Becker, E. Valeev and F. Neese, *Mol. Phys.*, 2015, **113**(13-14), 1961–1977; (d) E. Caldeweyher, C. Bannwarth and S. Grimme, *J. Chem. Phys.*, 2017, **147**(3); (e) S. Lehtola, C. Steigemann, M. J. T. Oliveira and M. A. L. Marques, *SoftwareX*, 2018, **7**, 1–5; (f) E. Caldeweyher, S. Ehlert, A. Hansen, H. Neugebauer, S. Spicher, C. Bannwarth and S. Grimme, *J. Chem. Phys.*, 2019, **150**(15); (g) E. Caldeweyher, J.-M. Mewes, S. Ehlert and S. Grimme, *Phys. Chem. Chem. Phys.*, 2020, **22**(16), 8499–8512; (h) F. Neese, *J. Comput. Chem.*, 2022, **44**(3), 381–396; (i) L. Wittmann, I. Gordiy, M. Friede, B. Helmich-Paris, S. Grimme, A. Hansen and M. Bursch, *Phys. Chem. Chem. Phys.*, 2024, **26**(32), 21379–21394.
9. (a) F. Neese, F. Wennmohs, A. Hansen and U. Becker, *Chem. Phys.*, 2009, **356**(1-3), 98–109; (b) S. Grimme, J. Antony, S. Ehrlich and H. Krieg, *J. Chem. Phys.*, 2010, **132**(15); (c) S. Grimme, S. Ehrlich and L. Goerigk, *J. Comput. Chem.*, 2011, **32**(7), 1456–1465; (d) B. Helmich-Paris, B. de Souza, F. Neese and R. Izsák, *J. Chem. Phys.*, 2021, **155**(10).

10. T. Lu and F. Chen, *J. Comput. Chem.*, 2012, **33**(5), 580–592.
11. E. D. Glendening, C. R. Landis and F. Weinhold, *J. Comput. Chem.*, 2019, **40**(25), 2234–2241.
12. J. A. Smith and K. D. Moeller, *Org. Lett.*, 2013, **15**(22), 5818–5821.
13. T. Matsuo, K. Suzuki, T. Fukawa, B. Li, M. Ito, Y. Shoji, T. Otani, L. Li, M. Kobayashi, M. Hachiya, Y. Tahara, D. Hashizume, T. Fukunaga, A. Fukazawa, Y. Li, H. Tsuji and K. Tamao, *Bull. Chem. Soc. Jpn.*, 2011, **84**(11), 1178–1191.
14. L. Wagner, *Org. Synth.*, 2025, **102**, 350–366.
15. L. J. Irwin, J. H. Reibenspies and S. A. Miller, *J. Am. Chem. Soc.*, 2004, **126**(51), 16716–16717.
